# Supplementary material for: Rapid Bacterial Community Changes during Vermicomposting of Grape Marc Derived from Red Winemaking
Source: Microorganisms. 2019 Oct 19;7(10):473. doi: 10.3390/microorganisms7100473 (PMC6843324; doi:10.3390/microorganisms7100473)
Supplement: Supplementary file 1 [file microorganisms-07-00473-s001.zip › Supplementary Tables 1-3.xlsx]

## Sheet: ASVs
Supplementary Table 1. Abundance changes expressed as log2fold at the ASV level. Only the ASVs which exhibit significant differences over time are considered (p-values < 0.05).
baseMean	log2FoldChange	lfcSE	stat	pvalue	padj	Kingdom	Phylum	Class	Order	Family	Genus	ASV	compar	padjBIEN
1.30229	-19.4079	4.95028	-3.92058	8.83367e-05	0.000567977	Bacteria	Actinobacteria	Acidimicrobiia	Microtrichales	Ilumatobacteraceae	unclassified	ASV1473	0-14	0.000562484
0.917814	16.6133	4.97544	3.33907	0.000840605	0.00404572	Bacteria	Firmicutes	Bacilli	Bacillales	Paenibacillaceae	unclassified	ASV1963	0-14	0.00449233
0.920445	-16.86	4.95292	-3.40406	0.000663932	0.00327195	Bacteria	Proteobacteria	Alphaproteobacteria	Sphingomonadales	Sphingomonadaceae	unclassified	ASV1648	0-14	0.00361373
9.05431	21.3597	3.19447	6.68645	2.28645e-11	5.01799e-10	Bacteria	Bacteroidetes	Bacteroidia	Sphingobacteriales	Sphingobacteriaceae	Mucilaginibacter	ASV771	0-14	4.28888e-10
1.87242	-28.7397	4.922	-5.83903	5.25049e-09	6.85898e-08	Bacteria	Actinobacteria	Actinobacteria	Micrococcales	Microbacteriaceae	Leucobacter	ASV1156	0-14	6.03545e-08
2.60606	17.8891	4.69927	3.80677	0.000140791	0.000833604	Bacteria	Proteobacteria	Alphaproteobacteria	Sphingomonadales	Sphingomonadaceae	Sphingomonas	ASV1296	0-14	0.000858303
11.2386	8.21455	2.80728	2.92616	0.00343179	0.0145962	Bacteria	Bacteroidetes	Bacteroidia	Sphingobacteriales	Sphingobacteriaceae	Sphingobacterium	ASV713	0-14	0.0167122
7.70862	17.0112	3.70407	4.59256	4.37851e-06	3.51562e-05	Bacteria	Proteobacteria	unclassified	unclassified	unclassified	unclassified	ASV835	0-14	3.42783e-05
1.05723	-19.0821	4.97448	-3.83601	0.000125049	0.000762335	Bacteria	Planctomycetes	Phycisphaerae	Phycisphaerales	Phycisphaeraceae	unclassified	ASV1809	0-14	0.000774527
2.02423	19.148	4.96563	3.85611	0.000115206	0.000707569	Bacteria	Proteobacteria	Gammaproteobacteria	Betaproteobacteriales	Burkholderiaceae	Burkholderia-Caballeronia-Paraburkholderia	ASV1421	0-14	0.000718971
0.663806	-30	4.9758	-6.02918	1.64789e-09	2.51151e-08	Bacteria	Proteobacteria	Alphaproteobacteria	Rhodobacterales	Rhodobacteraceae	unclassified	ASV1950	0-14	2.11909e-08
48.0521	9.09465	1.98109	4.59074	4.41681e-06	3.52916e-05	Bacteria	Bacteroidetes	Bacteroidia	Sphingobacteriales	Sphingobacteriaceae	unclassified	ASV311	0-14	3.45371e-05
420.094	-13.4367	4.89749	-2.7436	0.00607703	0.0251326	Bacteria	Bacteroidetes	Bacteroidia	Sphingobacteriales	Sphingobacteriaceae	Sphingobacterium	ASV14	0-14	0.0283365
2521.17	8.40128	0.827998	10.1465	3.43467e-24	2.17441e-22	Bacteria	Proteobacteria	Gammaproteobacteria	Betaproteobacteriales	Burkholderiaceae	unclassified	ASV4	0-14	3.53342e-22
110.691	12.1144	1.54198	7.85639	3.95348e-15	1.08457e-13	Bacteria	Proteobacteria	Alphaproteobacteria	Acetobacterales	Acetobacteraceae	Gluconacetobacter	ASV158	0-14	1.35571e-13
147.325	-7.82521	1.38074	-5.66739	1.44989e-08	1.71692e-07	Bacteria	Verrucomicrobia	Verrucomicrobiae	Verrucomicrobiales	Rubritaleaceae	Luteolibacter	ASV108	0-14	1.50332e-07
266.156	4.36304	0.983552	4.43601	9.16437e-06	6.85661e-05	Bacteria	Bacteroidetes	Bacteroidia	Sphingobacteriales	Sphingobacteriaceae	Pedobacter	ASV75	0-14	6.84883e-05
3.35069	15.664	4.90571	3.19301	0.00140799	0.00645559	Bacteria	Proteobacteria	unclassified	unclassified	unclassified	unclassified	ASV1151	0-14	0.00726507
82.7657	10.657	2.21219	4.81742	1.45427e-06	1.27326e-05	Bacteria	Bacteroidetes	Bacteroidia	Flavobacteriales	Flavobacteriaceae	Flavobacterium	ASV194	0-14	1.19836e-05
55.8074	-25.0836	4.8993	-5.11984	3.05795e-07	3.03216e-06	Bacteria	Actinobacteria	Actinobacteria	Micrococcales	Microbacteriaceae	Leucobacter	ASV163	0-14	2.70612e-06
666.591	15.3309	1.34378	11.4088	3.78062e-30	5.65719e-28	Bacteria	Proteobacteria	Gammaproteobacteria	Betaproteobacteriales	Burkholderiaceae	unclassified	ASV33	0-14	7.32107e-28
266.041	12.1894	1.18342	10.3002	7.03332e-25	4.63074e-23	Bacteria	Proteobacteria	Deltaproteobacteria	Oligoflexales	Oligoflexaceae	Oligoflexus	ASV78	0-14	7.59137e-23
4578.44	18.0272	1.29079	13.966	2.51178e-44	8.26878e-42	Bacteria	Bacteroidetes	Bacteroidia	Chitinophagales	unclassified	unclassified	ASV1	0-14	1.0336e-41
104.46	2.96966	0.982047	3.02395	0.00249498	0.0108072	Bacteria	Bacteroidetes	Bacteroidia	Sphingobacteriales	Sphingobacteriaceae	Pedobacter	ASV155	0-14	0.0123511
691.27	-4.44438	1.35482	-3.28043	0.0010365	0.00484684	Bacteria	Proteobacteria	Alphaproteobacteria	Acetobacterales	Acetobacteraceae	Acetobacter	ASV9	0-14	0.00545076
1095.5	15.6519	1.47987	10.5765	3.82813e-26	2.73961e-24	Bacteria	Bacteroidetes	Bacteroidia	Chitinophagales	unclassified	unclassified	ASV17	0-14	4.50079e-24
149.719	-4.82073	1.54055	-3.12922	0.00175274	0.00783705	Bacteria	Proteobacteria	Gammaproteobacteria	Betaproteobacteriales	Burkholderiaceae	Hydrogenophaga	ASV114	0-14	0.00890433
450.518	14.0355	1.24302	11.2914	1.44661e-29	1.7008e-27	Bacteria	Proteobacteria	Alphaproteobacteria	Rhodobacterales	Rhodobacteraceae	unclassified	ASV48	0-14	2.50644e-27
13.1987	-17.5152	3.1897	-5.49117	3.99274e-08	4.44057e-07	Bacteria	Bacteroidetes	Bacteroidia	Cytophagales	Spirosomaceae	Leadbetterella	ASV635	0-14	3.8433e-07
0.674725	-30	4.97524	-6.02985	1.64107e-09	2.51151e-08	Bacteria	Actinobacteria	Acidimicrobiia	IMCC26256	unclassified	unclassified	ASV1877	0-14	2.11444e-08
4.01861	25.9884	4.79428	5.42071	5.93627e-08	6.42835e-07	Bacteria	Proteobacteria	Alphaproteobacteria	Sphingomonadales	Sphingomonadaceae	Sphingobium	ASV1115	0-14	5.55966e-07
2.69865	-17.4221	4.95272	-3.51768	0.00043533	0.00230403	Bacteria	Actinobacteria	Actinobacteria	Micrococcales	Microbacteriaceae	unclassified	ASV1244	0-14	0.00247301
11.2423	-23.7074	4.9754	-4.76493	1.8892e-06	1.63664e-05	Bacteria	Proteobacteria	Alphaproteobacteria	Rhizobiales	Kaistiaceae	Kaistia	ASV686	0-14	1.53751e-05
12.4903	9.73655	3.44159	2.82908	0.0046682	0.0195396	Bacteria	Proteobacteria	Gammaproteobacteria	Enterobacteriales	Enterobacteriaceae	unclassified	ASV617	0-14	0.0222398
1.02889	-18.1377	4.95309	-3.66189	0.000250366	0.00137247	Bacteria	Actinobacteria	Acidimicrobiia	Microtrichales	unclassified	unclassified	ASV1810	0-14	0.00147048
96.1054	9.69976	1.56034	6.21644	5.08551e-10	9.51221e-09	Bacteria	Bacteroidetes	Bacteroidia	Sphingobacteriales	Sphingobacteriaceae	Pedobacter	ASV178	0-14	7.59252e-09
61.4525	4.62496	1.42298	3.25019	0.00115328	0.00534732	Bacteria	Firmicutes	Clostridia	Clostridiales	Clostridiaceae_1	Clostridium_sensu_stricto_3	ASV277	0-14	0.00601203
3.98408	-20.4634	4.96094	-4.12491	3.70884e-05	0.000252262	Bacteria	Proteobacteria	Alphaproteobacteria	Rhizobiales	Xanthobacteraceae	Tardiphaga	ASV961	0-14	0.000253047
27.2807	5.94386	1.86366	3.18935	0.00142593	0.00651965	Bacteria	Proteobacteria	Alphaproteobacteria	Rhizobiales	Devosiaceae	Arsenicitalea	ASV446	0-14	0.00735183
16.9311	8.23127	2.61706	3.14524	0.00165951	0.00748373	Bacteria	Actinobacteria	Actinobacteria	Micrococcales	Microbacteriaceae	Herbiconiux	ASV564	0-14	0.00848311
7.0195	17.76	4.53269	3.91822	8.92064e-05	0.000569123	Bacteria	Proteobacteria	Gammaproteobacteria	Betaproteobacteriales	Burkholderiaceae	unclassified	ASV899	0-14	0.000566925
2.96262	18.1411	4.95487	3.66126	0.00025098	0.00137247	Bacteria	Bacteroidetes	Bacteroidia	unclassified	unclassified	unclassified	ASV1301	0-14	0.00147277
10.6988	28.4878	4.91853	5.79194	6.95794e-09	8.80982e-08	Bacteria	Actinobacteria	Actinobacteria	Micrococcales	Microbacteriaceae	Curtobacterium	ASV725	0-14	7.81759e-08
2.01472	-20.2396	4.94962	-4.08911	4.33028e-05	0.000290924	Bacteria	Firmicutes	Bacilli	Bacillales	Paenibacillaceae	Paenibacillus	ASV1229	0-14	0.000292116
2.0952	19.2558	4.96447	3.87871	0.000105011	0.000654726	Bacteria	Proteobacteria	Gammaproteobacteria	Betaproteobacteriales	Burkholderiaceae	Janthinobacterium	ASV1464	0-14	0.000658467
6.22437	-25.4728	4.65913	-5.46729	4.56981e-08	5.04826e-07	Bacteria	Proteobacteria	Alphaproteobacteria	Caulobacterales	Caulobacteraceae	Brevundimonas	ASV752	0-14	4.36685e-07
4.21426	17.0265	4.9734	3.42351	0.00061818	0.00305563	Bacteria	Bacteroidetes	Bacteroidia	Chitinophagales	Chitinophagaceae	Filimonas	ASV1137	0-14	0.00338611
2.0312	-19.2146	4.96119	-3.87299	0.000107508	0.000667768	Bacteria	Bacteroidetes	Bacteroidia	Chitinophagales	Chitinophagaceae	unclassified	ASV1357	0-14	0.000673486
3.11585	18.5332	4.98311	3.71921	0.000199846	0.00113822	Bacteria	Proteobacteria	Alphaproteobacteria	Rhizobiales	Stappiaceae	Agaricicola	ASV1213	0-14	0.001194
0.801137	15.1344	4.97876	3.03979	0.0023674	0.0102816	Bacteria	Proteobacteria	Alphaproteobacteria	Azospirillales	Azospirillaceae	Azospirillum	ASV2065	0-14	0.0117372
19.9685	24.0661	3.05279	7.88333	3.18761e-15	9.04623e-14	Bacteria	Bacteroidetes	Bacteroidia	Sphingobacteriales	Sphingobacteriaceae	Mucilaginibacter	ASV506	0-14	1.10459e-13
0.984301	-17.1652	4.95457	-3.46452	0.000531179	0.00271528	Bacteria	Proteobacteria	Alphaproteobacteria	Rhizobiales	Beijerinckiaceae	Microvirga	ASV1773	0-14	0.00294632
20.739	-29.9108	4.85372	-6.16246	7.16228e-10	1.32462e-08	Bacteria	Proteobacteria	Alphaproteobacteria	Acetobacterales	Acetobacteraceae	Roseococcus	ASV374	0-14	1.03187e-08
1.50927	-17.8796	4.95117	-3.61119	0.000304799	0.00164491	Bacteria	Proteobacteria	Alphaproteobacteria	unclassified	unclassified	unclassified	ASV1460	0-14	0.00176499
0.876363	19.7073	4.95844	3.97449	7.053e-05	0.000460684	Bacteria	Proteobacteria	Alphaproteobacteria	Rhodospirillales	unclassified	unclassified	ASV2022	0-14	0.000459772
1.71188	24.2592	4.93879	4.91196	9.01684e-07	8.15479e-06	Bacteria	Proteobacteria	Gammaproteobacteria	Legionellales	Legionellaceae	Legionella	ASV1537	0-14	7.60139e-06
15.0162	29.4954	4.91788	5.99758	2.00284e-09	2.9174e-08	Bacteria	Bacteroidetes	Bacteroidia	Chitinophagales	Chitinophagaceae	unclassified	ASV603	0-14	2.52135e-08
3.14383	-27.8534	4.94286	-5.63507	1.74985e-08	2.04273e-07	Bacteria	Proteobacteria	Gammaproteobacteria	Xanthomonadales	Xanthomonadaceae	Luteimonas	ASV1096	0-14	1.79176e-07
0.7861	-16.3613	4.95651	-3.30098	0.000963466	0.00457162	Bacteria	Firmicutes	Bacilli	Bacillales	Paenibacillaceae	Paenibacillus	ASV2159	0-14	0.00510491
1.34518	17.4381	4.9661	3.51143	0.000445709	0.00234389	Bacteria	Bacteroidetes	Bacteroidia	Flavobacteriales	Flavobacteriaceae	Flavobacterium	ASV1649	0-14	0.00251893
8.70417	24.9356	3.92856	6.34727	2.19176e-10	4.24428e-09	Bacteria	Bacteroidetes	Bacteroidia	Cytophagales	Spirosomaceae	Leadbetterella	ASV777	0-14	3.47724e-09
76.9924	10.3822	1.73177	5.99511	2.03348e-09	2.93606e-08	Bacteria	Bacteroidetes	Bacteroidia	Flavobacteriales	Weeksellaceae	Chryseobacterium	ASV218	0-14	2.55504e-08
54.6984	-8.47891	1.89244	-4.48042	7.44974e-06	5.73004e-05	Bacteria	Proteobacteria	Gammaproteobacteria	Xanthomonadales	Xanthomonadaceae	unclassified	ASV185	0-14	5.63136e-05
24.79	-24.3161	2.86446	-8.48889	2.08624e-17	7.30627e-16	Bacteria	Bacteroidetes	Bacteroidia	Chitinophagales	Chitinophagaceae	Taibaiella	ASV441	0-14	1.03277e-15
158.072	11.5191	1.4239	8.08982	5.97511e-16	1.85567e-14	Bacteria	Bacteroidetes	Bacteroidia	Chitinophagales	Chitinophagaceae	Taibaiella	ASV121	0-14	2.32782e-14
35.4846	10.3745	3.94362	2.63069	0.00852113	0.0340432	Bacteria	Patescibacteria	Gracilibacteria	JGI_0000069-P22	unclassified	unclassified	ASV377	0-14	0.0386651
2.63695	13.3661	4.984	2.68181	0.00732257	0.0297762	Bacteria	Proteobacteria	Gammaproteobacteria	Xanthomonadales	Xanthomonadaceae	Xanthomonas	ASV1349	0-14	0.0337
8.77505	17.8735	4.11448	4.34405	1.39877e-05	0.000102785	Bacteria	Proteobacteria	Gammaproteobacteria	Cellvibrionales	Cellvibrionaceae	Cellvibrio	ASV763	0-14	0.000102101
0.969759	-15.665	4.95879	-3.15905	0.00158285	0.00717735	Bacteria	Planctomycetes	Planctomycetacia	Planctomycetales	Rubinisphaeraceae	SH-PL14	ASV1790	0-14	0.00811644
3.20726	-16.7544	4.76668	-3.51489	0.000439929	0.00232091	Bacteria	Bacteroidetes	Bacteroidia	Chitinophagales	Chitinophagaceae	Chitinophaga	ASV1087	0-14	0.00249698
4.62699	-18.3054	4.95248	-3.69621	0.000218846	0.00122875	Bacteria	Proteobacteria	Gammaproteobacteria	Xanthomonadales	Rhodanobacteraceae	Dokdonella	ASV989	0-14	0.00130044
62.8069	11.1055	1.8466	6.01404	1.80953e-09	2.65936e-08	Bacteria	Proteobacteria	Gammaproteobacteria	Xanthomonadales	Xanthomonadaceae	Stenotrophomonas	ASV254	0-14	2.30443e-08
0.229946	-16.4913	4.96189	-3.3236	0.000888639	0.00423971	Bacteria	Chloroflexi	JG30-KF-CM66	unclassified	unclassified	unclassified	ASV3231	0-14	0.00472601
0.863974	-17.7263	4.95443	-3.57787	0.00034641	0.00186199	Bacteria	Proteobacteria	Alphaproteobacteria	Rhizobiales	Devosiaceae	unclassified	ASV1841	0-14	0.00199367
18.7877	29.1822	4.93588	5.91225	3.37474e-09	4.59076e-08	Bacteria	Proteobacteria	Gammaproteobacteria	Betaproteobacteriales	Burkholderiaceae	unclassified	ASV540	0-14	4.04723e-08
23.8675	7.70559	2.12154	3.63208	0.000281148	0.00152227	Bacteria	Proteobacteria	Gammaproteobacteria	Betaproteobacteriales	Methylophilaceae	Methylobacillus	ASV465	0-14	0.00163667
0.993369	-18.8166	4.95117	-3.80044	0.000144437	0.000852128	Bacteria	Proteobacteria	Alphaproteobacteria	Sphingomonadales	Sphingomonadaceae	Altererythrobacter	ASV1547	0-14	0.000878904
0.603059	-17.7992	4.97572	-3.57721	0.000347286	0.00186199	Bacteria	Fibrobacteres	Fibrobacteria	Fibrobacterales	Fibrobacteraceae	possible_genus_04	ASV1973	0-14	0.00199697
5.2801	26.3697	4.67146	5.64485	1.65326e-08	1.94376e-07	Bacteria	Proteobacteria	Gammaproteobacteria	Betaproteobacteriales	Burkholderiaceae	Variovorax	ASV988	0-14	1.70212e-07
12.2871	21.0102	4.9819	4.2173	2.47245e-05	0.000173177	Bacteria	Firmicutes	Bacilli	Lactobacillales	Lactobacillaceae	Lactobacillus	ASV734	0-14	0.000172993
3.46672	26.3184	4.93768	5.3301	9.81573e-08	1.03568e-06	Bacteria	Bacteroidetes	Bacteroidia	Flavobacteriales	Flavobacteriaceae	Flavobacterium	ASV1145	0-14	9.07679e-07
3.71823	-30	4.898	-6.12495	9.07102e-10	1.5553e-08	Bacteria	Proteobacteria	Alphaproteobacteria	Rhodobacterales	Rhodobacteraceae	unclassified	ASV758	0-14	1.2547e-08
57.5899	28.9108	4.21009	6.86703	6.55522e-12	1.45809e-10	Bacteria	Proteobacteria	Alphaproteobacteria	Acetobacterales	Acetobacteraceae	unclassified	ASV268	0-14	1.32391e-10
3.89722	24.9958	4.9368	5.06315	4.12394e-07	3.9696e-06	Bacteria	Bacteroidetes	Bacteroidia	Cytophagales	Spirosomaceae	Dyadobacter	ASV1108	0-14	3.60107e-06
2.63212	-18.9456	4.94937	-3.82788	0.00012925	0.000779286	Bacteria	Actinobacteria	Thermoleophilia	Solirubrobacterales	Solirubrobacteraceae	Solirubrobacter	ASV1192	0-14	0.000795308
187.637	5.23978	1.49717	3.4998	0.000465607	0.00239496	Bacteria	Bacteroidetes	Bacteroidia	Chitinophagales	Chitinophagaceae	Filimonas	ASV99	0-14	0.00260676
3.96382	19.1058	4.18751	4.56257	5.05316e-06	4.01811e-05	Bacteria	Proteobacteria	Alphaproteobacteria	Micavibrionales	unclassified	unclassified	ASV1135	0-14	3.91873e-05
7.21617	-21.3146	4.31606	-4.93844	7.87513e-07	7.20137e-06	Bacteria	Gemmatimonadetes	Gemmatimonadetes	Gemmatimonadales	Gemmatimonadaceae	unclassified	ASV785	0-14	6.68169e-06
318.967	11.8613	1.19737	9.90615	3.91457e-23	2.22186e-21	Bacteria	Bacteroidetes	Bacteroidia	Cytophagales	Spirosomaceae	Dyadobacter	ASV68	0-14	3.48291e-21
1.62488	-30	4.97454	-6.03071	1.63238e-09	2.51151e-08	Bacteria	Bacteroidetes	Bacteroidia	Cytophagales	Spirosomaceae	Persicitalea	ASV1269	0-14	2.1103e-08
6.57201	26.6195	4.93605	5.39288	6.93362e-08	7.41087e-07	Bacteria	Bacteroidetes	Bacteroidia	Sphingobacteriales	Sphingobacteriaceae	unclassified	ASV901	0-14	6.44788e-07
12.2204	14.7282	4.68655	3.14264	0.00167429	0.00752973	Bacteria	Firmicutes	Bacilli	Bacillales	Paenibacillaceae	Paenibacillus	ASV648	0-14	0.00855199
94.1279	10.3518	1.39362	7.428	1.10248e-13	2.70848e-12	Bacteria	Bacteroidetes	Bacteroidia	Flavobacteriales	Flavobacteriaceae	Flavobacterium	ASV176	0-14	2.88045e-12
53.5328	17.2063	2.14994	8.00316	1.21266e-15	3.62917e-14	Bacteria	Bacteroidetes	Bacteroidia	Chitinophagales	Chitinophagaceae	unclassified	ASV292	0-14	4.41115e-14
131.38	6.31299	1.498	4.21429	2.50565e-05	0.000174758	Bacteria	Proteobacteria	Alphaproteobacteria	Caulobacterales	Caulobacteraceae	Caulobacter	ASV141	0-14	0.00017494
54.4883	11.4437	4.36774	2.62005	0.0087918	0.0350395	Bacteria	Proteobacteria	Gammaproteobacteria	Betaproteobacteriales	Burkholderiaceae	unclassified	ASV279	0-14	0.0397563
31.4534	9.74269	2.19296	4.44272	8.883e-06	6.67645e-05	Bacteria	Proteobacteria	Gammaproteobacteria	Betaproteobacteriales	Burkholderiaceae	Pandoraea	ASV417	0-14	6.66883e-05
1.14148	-17.6498	4.95137	-3.56462	0.000364378	0.00194099	Bacteria	Actinobacteria	Actinobacteria	Corynebacteriales	Mycobacteriaceae	Mycobacterium	ASV1454	0-14	0.00208978
5.42234	-25.214	4.92471	-5.11988	3.05723e-07	3.03216e-06	Bacteria	Firmicutes	Bacilli	Bacillales	Paenibacillaceae	Cohnella	ASV958	0-14	2.70612e-06
8.98215	-22.1762	4.58339	-4.83838	1.30899e-06	1.15219e-05	Bacteria	Bacteroidetes	Bacteroidia	Chitinophagales	Chitinophagaceae	Taibaiella	ASV724	0-14	1.08407e-05
204.835	4.01704	1.01799	3.94604	7.94541e-05	0.000516923	Bacteria	Actinobacteria	Actinobacteria	Propionibacteriales	Nocardioidaceae	Nocardioides	ASV90	0-14	0.000510367
0.650325	-18.1101	4.95237	-3.65686	0.000255321	0.00138921	Bacteria	Proteobacteria	Gammaproteobacteria	CCD24	unclassified	unclassified	ASV1912	0-14	0.00149558
3.6771	-21.0357	4.94915	-4.25036	2.13424e-05	0.000152737	Bacteria	Firmicutes	Erysipelotrichia	Erysipelotrichales	Erysipelotrichaceae	Turicibacter	ASV893	0-14	0.000151747
0.798543	-18.3074	4.95176	-3.69714	0.000218041	0.00122875	Bacteria	Fibrobacteres	Fibrobacteria	Fibrobacterales	possible_family_01	unclassified	ASV1694	0-14	0.00129682
30.1162	6.81422	2.20245	3.09394	0.0019752	0.00873974	Bacteria	Proteobacteria	Alphaproteobacteria	Rhodobacterales	Rhodobacteraceae	unclassified	ASV425	0-14	0.00993486
1.528	-17.7917	4.97699	-3.57479	0.000350512	0.00187319	Bacteria	Firmicutes	Bacilli	Bacillales	unclassified	unclassified	ASV1461	0-14	0.00201376
20.2104	-22.818	4.92261	-4.63534	3.56356e-06	2.94755e-05	Bacteria	Epsilonbacteraeota	Campylobacteria	Campylobacterales	Arcobacteraceae	Arcobacter	ASV368	0-14	2.82341e-05
0.864921	-18.7195	4.95241	-3.77988	0.000156906	0.000909391	Bacteria	Actinobacteria	Thermoleophilia	Solirubrobacterales	Solirubrobacteraceae	Conexibacter	ASV1840	0-14	0.000946901
23.4884	5.32428	2.01704	2.63965	0.00829916	0.0333181	Bacteria	unclassified	unclassified	unclassified	unclassified	unclassified	ASV501	0-14	0.0377099
17.9322	23.7629	3.26087	7.2873	3.1624e-13	7.33142e-12	Bacteria	Acidobacteria	Acidobacteriia	Acidobacteriales	Acidobacteriaceae_(Subgroup_1)	Terriglobus	ASV519	0-14	7.62682e-12
36.6747	-29.7123	4.89775	-6.06652	1.30709e-09	2.15147e-08	Bacteria	Proteobacteria	Alphaproteobacteria	Sphingomonadales	Sphingomonadaceae	Novosphingobium	ASV224	0-14	1.73505e-08
7.2897	22.4558	4.96355	4.52415	6.06391e-06	4.73043e-05	Bacteria	Proteobacteria	Gammaproteobacteria	Xanthomonadales	Xanthomonadaceae	SN8	ASV867	0-14	4.64242e-05
0.874822	-15.1794	4.97909	-3.04863	0.00229891	0.0100638	Bacteria	Proteobacteria	Alphaproteobacteria	Micropepsales	Micropepsaceae	unclassified	ASV1778	0-14	0.0114234
4.47985	-20.0338	4.94856	-4.04841	5.15658e-05	0.00034503	Bacteria	Actinobacteria	Thermoleophilia	Solirubrobacterales	67-14	unclassified	ASV815	0-14	0.000344679
24.0614	21.409	2.8912	7.40489	1.3126e-13	3.17726e-12	Bacteria	Firmicutes	Clostridia	Clostridiales	Lachnospiraceae	Anaerocolumna	ASV490	0-14	3.37584e-12
44.7625	10.4105	1.85803	5.60294	2.1075e-08	2.39238e-07	Bacteria	Bacteroidetes	Bacteroidia	Sphingobacteriales	Sphingobacteriaceae	Mucilaginibacter	ASV322	0-14	2.12338e-07
48.1271	6.43009	1.83677	3.50076	0.000463936	0.00239496	Bacteria	Proteobacteria	Alphaproteobacteria	Acetobacterales	Acetobacteraceae	unclassified	ASV308	0-14	0.00260184
17.8464	7.73643	2.91197	2.65677	0.00788943	0.0318285	Bacteria	Bacteroidetes	Bacteroidia	Sphingobacteriales	Sphingobacteriaceae	unclassified	ASV545	0-14	0.0360222
133.419	-5.79422	1.555	-3.72618	0.000194402	0.00111285	Bacteria	Proteobacteria	Alphaproteobacteria	Sphingomonadales	Sphingomonadaceae	Novosphingobium	ASV117	0-14	0.00116358
0.881373	16.2413	4.97616	3.26381	0.00109924	0.00511114	Bacteria	Proteobacteria	Gammaproteobacteria	Legionellales	Legionellaceae	Legionella	ASV2073	0-14	0.00576224
1.40568	-19.1562	4.95056	-3.8695	0.000109059	0.000674853	Bacteria	Proteobacteria	Alphaproteobacteria	Rhizobiales	Xanthobacteraceae	unclassified	ASV1430	0-14	0.000681903
851.895	11.5526	0.939448	12.2972	9.37869e-35	1.92966e-32	Bacteria	Proteobacteria	Gammaproteobacteria	Xanthomonadales	Rhodanobacteraceae	Frateuria	ASV24	0-14	2.37497e-32
159.007	7.72379	2.59307	2.97863	0.0028954	0.012476	Bacteria	Proteobacteria	Gammaproteobacteria	Xanthomonadales	Xanthomonadaceae	Stenotrophomonas	ASV122	0-14	0.0142052
627.267	8.73496	0.902804	9.67536	3.83742e-22	1.97387e-20	Bacteria	Proteobacteria	Gammaproteobacteria	Betaproteobacteriales	Burkholderiaceae	Duganella	ASV34	0-14	3.19817e-20
117.882	12.5162	1.42356	8.79222	1.46638e-18	6.03416e-17	Bacteria	Proteobacteria	Alphaproteobacteria	Rhizobiales	Rhizobiaceae	unclassified	ASV151	0-14	8.39535e-17
32.6837	-5.86223	2.17412	-2.69637	0.00700995	0.0286312	Bacteria	Proteobacteria	Alphaproteobacteria	Rhizobiales	Xanthobacteraceae	Bradyrhizobium	ASV349	0-14	0.032343
81.1856	6.12155	1.83848	3.32967	0.000869476	0.00417247	Bacteria	Bacteroidetes	Bacteroidia	Flavobacteriales	Weeksellaceae	unclassified	ASV211	0-14	0.00463533
14.5808	7.25618	2.28383	3.17719	0.00148708	0.00677519	Bacteria	Proteobacteria	Alphaproteobacteria	Rhizobiales	Rhizobiaceae	unclassified	ASV608	0-14	0.00764916
57.9136	17.0566	4.97019	3.43178	0.00059964	0.00299093	Bacteria	Bacteroidetes	Bacteroidia	Flavobacteriales	Flavobacteriaceae	Flavobacterium	ASV265	0-14	0.00329827
8.01683	18.7489	3.01221	6.22431	4.83685e-10	9.15109e-09	Bacteria	Proteobacteria	Alphaproteobacteria	Sphingomonadales	Sphingomonadaceae	Sphingobium	ASV856	0-14	7.23768e-09
2.12796	-19.2436	4.95024	-3.88741	0.000101318	0.000636523	Bacteria	Bacteroidetes	Bacteroidia	Bacteroidales	Dysgonomonadaceae	Dysgonomonas	ASV1128	0-14	0.000637131
1.41129	17.1781	4.9627	3.46144	0.0005373	0.00273807	Bacteria	Bacteroidetes	Bacteroidia	Chitinophagales	Chitinophagaceae	Taibaiella	ASV1587	0-14	0.00297526
209.782	13.4064	4.34342	3.08661	0.00202455	0.00891018	Bacteria	Bacteroidetes	Bacteroidia	Flavobacteriales	Weeksellaceae	Chryseobacterium	ASV92	0-14	0.0101366
4.54967	-29.6095	4.94126	-5.99229	2.069e-09	2.96137e-08	Bacteria	Proteobacteria	Alphaproteobacteria	Rhodobacterales	Rhodobacteraceae	unclassified	ASV973	0-14	2.59473e-08
52.1501	5.51811	1.48548	3.71469	0.000203451	0.00115476	Bacteria	Actinobacteria	Actinobacteria	Micrococcales	Microbacteriaceae	unclassified	ASV272	0-14	0.00121444
135.975	-30	4.89744	-6.12565	9.03169e-10	1.5553e-08	Bacteria	Proteobacteria	Gammaproteobacteria	Xanthomonadales	Xanthomonadaceae	unclassified	ASV65	0-14	1.25334e-08
159.028	8.43517	1.87531	4.49801	6.85927e-06	5.30064e-05	Bacteria	Bacteroidetes	Bacteroidia	Bacteroidales	Dysgonomonadaceae	Dysgonomonas	ASV136	0-14	5.21495e-05
7.0297	21.0668	3.67098	5.73874	9.53835e-09	1.17165e-07	Bacteria	Proteobacteria	Deltaproteobacteria	Bdellovibrionales	Bdellovibrionaceae	Bdellovibrio	ASV846	0-14	1.03121e-07
27.8751	29.812	4.58465	6.50256	7.89645e-11	1.62469e-09	Bacteria	Proteobacteria	Alphaproteobacteria	Rhizobiales	Rhizobiaceae	unclassified	ASV432	0-14	1.35745e-09
195.172	2.01967	0.785394	2.57154	0.0101248	0.0399652	Bacteria	Proteobacteria	Alphaproteobacteria	Rhizobiales	Kaistiaceae	Kaistia	ASV93	0-14	0.0451334
520.411	30	2.02349	14.8258	9.97311e-50	5.47191e-47	Bacteria	Bacteroidetes	Bacteroidia	Chitinophagales	unclassified	unclassified	ASV43	0-14	5.051e-47
12.9889	23.3928	4.92877	4.74617	2.07307e-06	1.77722e-05	Bacteria	Bacteroidetes	Bacteroidia	Sphingobacteriales	Sphingobacteriaceae	Mucilaginibacter	ASV646	0-14	1.68092e-05
43.5064	25.0253	2.67825	9.34391	9.28374e-21	4.49442e-19	Bacteria	Proteobacteria	Gammaproteobacteria	Pseudomonadales	Pseudomonadaceae	Pseudomonas	ASV330	0-14	6.94593e-19
0.417577	-17.345	4.95547	-3.50018	0.000464943	0.00239496	Bacteria	Firmicutes	Clostridia	Clostridiales	Ruminococcaceae	unclassified	ASV2400	0-14	0.00260526
53.2373	-6.55361	1.44687	-4.52951	5.91208e-06	4.63395e-05	Bacteria	Proteobacteria	Alphaproteobacteria	Caulobacterales	Caulobacteraceae	Brevundimonas	ASV266	0-14	4.53673e-05
813.151	3.30565	0.765502	4.31828	1.57249e-05	0.000114527	Bacteria	Proteobacteria	Alphaproteobacteria	Rhizobiales	Rhizobiaceae	unclassified	ASV23	0-14	0.000113772
3.74088	-20.746	4.94901	-4.19195	2.76572e-05	0.000192083	Bacteria	Actinobacteria	Actinobacteria	Streptosporangiales	Thermomonosporaceae	Actinomadura	ASV932	0-14	0.000192286
0.436288	-18.8943	4.97645	-3.79673	0.000146615	0.000861885	Bacteria	Firmicutes	Clostridia	Clostridiales	Ruminococcaceae	Ruminococcaceae_NK4A214_group	ASV2230	0-14	0.000891331
45.7074	8.9187	1.77134	5.03501	4.77825e-07	4.49429e-06	Bacteria	Bacteroidetes	Bacteroidia	Flavobacteriales	Flavobacteriaceae	Flavobacterium	ASV335	0-14	4.1504e-06
12.4497	29.443	4.91817	5.98659	2.1429e-09	3.0407e-08	Bacteria	Bacteroidetes	Bacteroidia	Sphingobacteriales	Sphingobacteriaceae	unclassified	ASV663	0-14	2.67213e-08
2.51449	-15.9963	4.97662	-3.2143	0.00130764	0.0060122	Bacteria	Proteobacteria	Alphaproteobacteria	Rhizobiales	Stappiaceae	Agaricicola	ASV1193	0-14	0.00676846
4.37767	20.4452	4.93533	4.14262	3.43368e-05	0.000234516	Bacteria	Actinobacteria	Actinobacteria	Micrococcales	Microbacteriaceae	unclassified	ASV1054	0-14	0.000235248
97.1052	27.0372	1.75716	15.3869	2.00403e-53	3.29863e-50	Bacteria	Verrucomicrobia	Verrucomicrobiae	Verrucomicrobiales	Rubritaleaceae	Luteolibacter	ASV171	0-14	1.31945e-50
7.33088	16.3129	4.81908	3.38506	0.000711626	0.00347578	Bacteria	Bacteroidetes	Bacteroidia	Flavobacteriales	Crocinitomicaceae	Fluviicola	ASV842	0-14	0.00384676
465.494	12.9614	1.61215	8.03983	8.9961e-16	2.74214e-14	Bacteria	Proteobacteria	Gammaproteobacteria	Enterobacteriales	Enterobacteriaceae	unclassified	ASV57	0-14	3.36536e-14
215.866	10.4207	1.20437	8.65237	5.04391e-18	1.93076e-16	Bacteria	Bacteroidetes	Bacteroidia	Cytophagales	Spirosomaceae	Dyadobacter	ASV91	0-14	2.72206e-16
2421.35	6.93848	1.12719	6.15558	7.48042e-10	1.36809e-08	Bacteria	Proteobacteria	Gammaproteobacteria	Pseudomonadales	Moraxellaceae	Acinetobacter	ASV5	0-14	1.07301e-08
56.6945	6.65421	1.94024	3.42959	0.000604493	0.00299697	Bacteria	Bacteroidetes	Bacteroidia	Sphingobacteriales	Sphingobacteriaceae	Nubsella	ASV295	0-14	0.00331665
102.192	8.42943	1.43648	5.86813	4.4073e-09	5.8979e-08	Bacteria	Bacteroidetes	Bacteroidia	Cytophagales	Spirosomaceae	Dyadobacter	ASV165	0-14	5.11776e-08
24.2834	-23.9802	4.89971	-4.89422	9.8698e-07	8.87743e-06	Bacteria	Bacteroidetes	Bacteroidia	Sphingobacteriales	Sphingobacteriaceae	unclassified	ASV316	0-14	8.28862e-06
32.2502	17.8209	3.28241	5.42922	5.6601e-08	6.21101e-07	Bacteria	Proteobacteria	Alphaproteobacteria	Rhizobiales	Rhizobiaceae	unclassified	ASV398	0-14	5.32372e-07
84.853	11.1553	1.4176	7.86914	3.57078e-15	9.96188e-14	Bacteria	Proteobacteria	Alphaproteobacteria	Rhizobiales	Rhizobiaceae	unclassified	ASV195	0-14	1.23089e-13
115.928	10.7472	1.91162	5.62204	1.88712e-08	2.18746e-07	Bacteria	Bacteroidetes	Bacteroidia	Flavobacteriales	Flavobacteriaceae	Flavobacterium	ASV149	0-14	1.92334e-07
58.6694	10.0262	1.68768	5.94081	2.83612e-09	3.89022e-08	Bacteria	Bacteroidetes	Bacteroidia	Flavobacteriales	Flavobacteriaceae	Flavobacterium	ASV278	0-14	3.44521e-08
61.0365	9.21919	1.86086	4.95427	7.26023e-07	6.67616e-06	Bacteria	Bacteroidetes	Bacteroidia	Cytophagales	Spirosomaceae	Dyadobacter	ASV273	0-14	6.16791e-06
2.05285	-19.6907	4.95042	-3.97758	6.96195e-05	0.000456548	Bacteria	Proteobacteria	Alphaproteobacteria	Sphingomonadales	Sphingomonadaceae	Sphingomonas	ASV1364	0-14	0.000454286
126.631	11.7667	1.30622	9.00822	2.0943e-19	9.07162e-18	Bacteria	Proteobacteria	Gammaproteobacteria	Pseudomonadales	Pseudomonadaceae	Pseudomonas	ASV139	0-14	1.32585e-17
16.2826	7.87025	3.03133	2.5963	0.00942337	0.0372857	Bacteria	Proteobacteria	Gammaproteobacteria	Aeromonadales	Aeromonadaceae	Aeromonas	ASV578	0-14	0.0422928
2.94938	16.5816	4.96087	3.34248	0.000830328	0.00400798	Bacteria	Proteobacteria	Alphaproteobacteria	Sphingomonadales	Sphingomonadaceae	Sphingobium	ASV1280	0-14	0.00444101
60.8185	9.74522	1.52909	6.37321	1.85113e-10	3.62734e-09	Bacteria	Firmicutes	Bacilli	Bacillales	Paenibacillaceae	Cohnella	ASV263	0-14	2.97992e-09
1.71526	14.1228	4.98848	2.83109	0.00463902	0.0194791	Bacteria	Proteobacteria	Alphaproteobacteria	Rickettsiales	Rickettsiaceae	unclassified	ASV1619	0-14	0.0221168
37.7933	19.1101	2.49669	7.65419	1.94527e-14	5.00299e-13	Bacteria	Bacteroidetes	Bacteroidia	Flavobacteriales	Flavobacteriaceae	Flavobacterium	ASV385	0-14	5.84824e-13
9.51027	17.1848	4.89768	3.50877	0.000450188	0.00235241	Bacteria	Proteobacteria	Gammaproteobacteria	Betaproteobacteriales	Burkholderiaceae	Cupriavidus	ASV748	0-14	0.00253554
26.3514	7.75695	2.29261	3.38345	0.000715802	0.00348583	Bacteria	Bacteroidetes	Bacteroidia	Sphingobacteriales	Sphingobacteriaceae	Mucilaginibacter	ASV455	0-14	0.00386615
3.5707	21.4614	4.955	4.33126	1.48261e-05	0.000108461	Bacteria	Proteobacteria	Alphaproteobacteria	Rhodobacterales	Rhodobacteraceae	unclassified	ASV1153	0-14	0.000107862
48.627	-5.56105	1.68471	-3.3009	0.000963761	0.00457162	Bacteria	Actinobacteria	Thermoleophilia	Solirubrobacterales	Solirubrobacteraceae	unclassified	ASV286	0-14	0.00510491
29.1211	23.655	4.91657	4.81128	1.49963e-06	1.30603e-05	Bacteria	Proteobacteria	Alphaproteobacteria	Rhizobiales	Rhizobiaceae	Allorhizobium-Neorhizobium-Pararhizobium-Rhizobium	ASV434	0-14	1.2342e-05
5.87887	17.756	3.48068	5.1013	3.37336e-07	3.28553e-06	Bacteria	Bacteroidetes	Bacteroidia	Sphingobacteriales	Sphingobacteriaceae	Pedobacter	ASV938	0-14	2.96927e-06
2.84547	-22.021	4.94958	-4.44907	8.62445e-06	6.54186e-05	Bacteria	Actinobacteria	Acidimicrobiia	Microtrichales	Iamiaceae	Iamia	ASV1117	0-14	6.48953e-05
30.0853	-8.55176	2.33881	-3.65645	0.000255729	0.00138921	Bacteria	Proteobacteria	Alphaproteobacteria	Rhizobiales	Devosiaceae	Devosia	ASV285	0-14	0.00149616
14.4652	9.89945	3.11635	3.17661	0.00149005	0.00677519	Bacteria	Proteobacteria	Alphaproteobacteria	Sphingomonadales	Sphingomonadaceae	Sphingomonas	ASV632	0-14	0.00765845
16.7479	-25.9382	4.92358	-5.26817	1.37791e-07	1.41752e-06	Bacteria	Proteobacteria	Gammaproteobacteria	Betaproteobacteriales	Burkholderiaceae	unclassified	ASV439	0-14	1.2533e-06
3.3212	18.3138	4.97244	3.68305	0.000230456	0.00127292	Bacteria	Bacteroidetes	Bacteroidia	unclassified	unclassified	unclassified	ASV1159	0-14	0.00136083
169.803	12.2152	1.43938	8.48644	2.13072e-17	7.30659e-16	Bacteria	Proteobacteria	Alphaproteobacteria	Acetobacterales	Acetobacteraceae	Gluconacetobacter	ASV110	0-14	1.04355e-15
5.69566	-15.8551	4.52593	-3.50316	0.000459769	0.00238732	Bacteria	Acidobacteria	Blastocatellia_(Subgroup_4)	Blastocatellales	Blastocatellaceae	Blastocatella	ASV897	0-14	0.00258066
35.8908	9.21872	2.18394	4.22114	2.43067e-05	0.000171663	Bacteria	Bacteroidetes	Bacteroidia	Chitinophagales	Chitinophagaceae	Taibaiella	ASV367	0-14	0.000170795
19.7277	-21.6739	4.9465	-4.38167	1.17771e-05	8.73204e-05	Bacteria	Proteobacteria	Alphaproteobacteria	Caulobacterales	Caulobacteraceae	Asticcacaulis	ASV444	0-14	8.70264e-05
12.0756	24.6449	2.85697	8.62622	6.34128e-18	2.3195e-16	Bacteria	Bacteroidetes	Bacteroidia	Flavobacteriales	Weeksellaceae	Chryseobacterium	ASV688	0-14	3.28748e-16
32.3056	-8.67902	2.07387	-4.18495	2.85234e-05	0.000197267	Bacteria	Proteobacteria	Alphaproteobacteria	Caulobacterales	Caulobacteraceae	Phenylobacterium	ASV291	0-14	0.000197474
5.32557	-18.3879	4.97579	-3.69548	0.000219472	0.00122875	Bacteria	Bacteroidetes	Bacteroidia	Cytophagales	Spirosomaceae	Leadbetterella	ASV923	0-14	0.00130298
7.85578	-24.2843	4.92355	-4.93228	8.12745e-07	7.39104e-06	Bacteria	Firmicutes	Bacilli	Lactobacillales	Leuconostocaceae	Leuconostoc	ASV612	0-14	6.88689e-06
41.5653	-29.1542	4.89752	-5.95285	2.63517e-09	3.67584e-08	Bacteria	Proteobacteria	Alphaproteobacteria	Acetobacterales	Acetobacteraceae	Komagataeibacter	ASV162	0-14	3.21892e-08
50.0941	28.6973	3.15272	9.10239	8.83616e-20	4.04009e-18	Bacteria	Proteobacteria	Alphaproteobacteria	Rhizobiales	Rhizobiaceae	unclassified	ASV299	0-14	5.76013e-18
13.4537	22.461	3.73273	6.01732	1.77324e-09	2.63308e-08	Bacteria	Proteobacteria	Alphaproteobacteria	Rhodobacterales	Rhodobacteraceae	unclassified	ASV622	0-14	2.26567e-08
8.23252	19.1233	4.29554	4.4519	8.51121e-06	6.48586e-05	Bacteria	Proteobacteria	Gammaproteobacteria	Betaproteobacteriales	Burkholderiaceae	unclassified	ASV801	0-14	6.41165e-05
48.9454	4.91795	1.61664	3.04208	0.00234949	0.010258	Bacteria	Proteobacteria	Alphaproteobacteria	Sphingomonadales	Sphingomonadaceae	Sphingomonas	ASV301	0-14	0.0116659
18.0983	-17.0693	3.04019	-5.61457	1.97057e-08	2.26822e-07	Bacteria	Proteobacteria	Gammaproteobacteria	Steroidobacterales	Steroidobacteraceae	Steroidobacter	ASV513	0-14	2.00219e-07
0.795145	-16.2766	4.95545	-3.28459	0.00102129	0.00480299	Bacteria	Proteobacteria	Alphaproteobacteria	Micropepsales	Micropepsaceae	unclassified	ASV1783	0-14	0.00538366
5.34359	-22.3444	4.92755	-4.53458	5.77173e-06	4.54558e-05	Bacteria	Gemmatimonadetes	Gemmatimonadetes	Gemmatimonadales	Gemmatimonadaceae	unclassified	ASV926	0-14	4.44457e-05
2.1497	16.5615	4.71822	3.51011	0.000447924	0.00234803	Bacteria	Bacteroidetes	Bacteroidia	Flavobacteriales	Weeksellaceae	unclassified	ASV1448	0-14	0.0025271
880.932	2.18793	0.636374	3.43812	0.000585774	0.00293717	Bacteria	Proteobacteria	Alphaproteobacteria	Rhizobiales	Rhizobiaceae	unclassified	ASV21	0-14	0.0032274
10.8181	-18.7532	4.94882	-3.78943	0.000150992	0.000881322	Bacteria	Proteobacteria	Alphaproteobacteria	Rhizobiales	Xanthobacteraceae	unclassified	ASV662	0-14	0.000913724
415.732	8.94283	1.34373	6.65523	2.82859e-11	6.12614e-10	Bacteria	Bacteroidetes	Bacteroidia	Chitinophagales	Chitinophagaceae	Chitinophaga	ASV50	0-14	5.27577e-10
3991.71	8.26135	1.41241	5.8491	4.94243e-09	6.50819e-08	Bacteria	Proteobacteria	Gammaproteobacteria	Enterobacteriales	Enterobacteriaceae	unclassified	ASV2	0-14	5.70894e-08
353.59	-2.61405	0.709106	-3.6864	0.00022745	0.00126055	Bacteria	Proteobacteria	Gammaproteobacteria	Betaproteobacteriales	Burkholderiaceae	Achromobacter	ASV47	0-14	0.00134549
6.37729	24.0908	4.69247	5.13392	2.83765e-07	2.84803e-06	Bacteria	Proteobacteria	Alphaproteobacteria	Rhodobacterales	Rhodobacteraceae	unclassified	ASV902	0-14	2.52133e-06
3.45837	-30	4.97431	-6.03098	1.62966e-09	2.51151e-08	Bacteria	Bacteroidetes	Bacteroidia	Chitinophagales	Chitinophagaceae	unclassified	ASV916	0-14	2.1103e-08
35.2599	10.0194	2.24077	4.47143	7.76972e-06	5.94835e-05	Bacteria	Bacteroidetes	Bacteroidia	Sphingobacteriales	Sphingobacteriaceae	Sphingobacterium	ASV391	0-14	5.8665e-05
124.366	-6.32112	1.3674	-4.62271	3.78756e-06	3.10165e-05	Bacteria	Proteobacteria	Alphaproteobacteria	Sphingomonadales	Sphingomonadaceae	Sphingopyxis	ASV137	0-14	2.99008e-05
3.08368	-18.8483	4.94785	-3.80939	0.000139308	0.0008308	Bacteria	Proteobacteria	Alphaproteobacteria	Reyranellales	Reyranellaceae	Reyranella	ASV1223	0-14	0.000850838
2.06412	-28.1399	4.94757	-5.68763	1.28817e-08	1.54769e-07	Bacteria	Bacteroidetes	Bacteroidia	Cytophagales	Cyclobacteriaceae	Algoriphagus	ASV1391	0-14	1.35919e-07
0.823339	-20.4006	4.97582	-4.09995	4.13248e-05	0.00027992	Bacteria	FBP	unclassified	unclassified	unclassified	unclassified	ASV1695	0-14	0.000279633
3.25779	17.059	4.97339	3.43006	0.00060344	0.00299697	Bacteria	Bacteroidetes	Bacteroidia	Flavobacteriales	Flavobacteriaceae	Flavobacterium	ASV1146	0-14	0.00331364
5.0339	-28.8676	4.92308	-5.86373	4.52574e-09	6.00756e-08	Bacteria	Proteobacteria	Alphaproteobacteria	Rhizobiales	Xanthobacteraceae	unclassified	ASV664	0-14	5.24604e-08
128.64	7.07343	1.21486	5.82241	5.80064e-09	7.40144e-08	Bacteria	Proteobacteria	Alphaproteobacteria	Rhodobacterales	Rhodobacteraceae	unclassified	ASV148	0-14	6.5961e-08
207.068	12.9967	1.8146	7.16234	7.93138e-13	1.8132e-11	Bacteria	Bacteroidetes	Bacteroidia	Flavobacteriales	Flavobacteriaceae	Flavobacterium	ASV97	0-14	1.8132e-11
3.24	-20.9094	3.96155	-5.27808	1.30546e-07	1.35144e-06	Bacteria	Proteobacteria	Alphaproteobacteria	Sphingomonadales	Sphingomonadaceae	Sphingobium	ASV1058	0-14	1.19377e-06
220.588	12.0037	1.18951	10.0913	6.03595e-24	3.67969e-22	Bacteria	Proteobacteria	Gammaproteobacteria	Pseudomonadales	Pseudomonadaceae	Pseudomonas	ASV89	0-14	5.93144e-22
961.93	15.3195	1.27855	11.9819	4.41831e-33	8.08059e-31	Bacteria	Bacteroidetes	Bacteroidia	Sphingobacteriales	Sphingobacteriaceae	Pedobacter	ASV20	0-14	1.00311e-30
0.281761	-16.2897	4.96153	-3.28321	0.00102634	0.00481296	Bacteria	Bacteroidetes	Bacteroidia	Cytophagales	Spirosomaceae	Leadbetterella	ASV2741	0-14	0.00540555
49.4343	-4.69347	1.79853	-2.60961	0.0090646	0.0360395	Bacteria	Bacteroidetes	Bacteroidia	Chitinophagales	Chitinophagaceae	Flavitalea	ASV283	0-14	0.0408496
12.5588	9.12171	2.47363	3.68757	0.000226403	0.00125899	Bacteria	Proteobacteria	Alphaproteobacteria	Paracaedibacterales	Paracaedibacteraceae	unclassified	ASV675	0-14	0.0013405
12.9249	14.468	3.58943	4.03071	5.56097e-05	0.000369087	Bacteria	Proteobacteria	Alphaproteobacteria	Rhizobiales	Rhizobiaceae	Martelella	ASV657	0-14	0.000368344
30.996	-23.3305	3.55731	-6.55845	5.43682e-11	1.13278e-09	Bacteria	Proteobacteria	Alphaproteobacteria	Rhizobiales	Beijerinckiaceae	Bosea	ASV281	0-14	9.72717e-10
39.8752	7.9409	1.72701	4.59806	4.26446e-06	3.44084e-05	Bacteria	Firmicutes	Bacilli	Bacillales	Paenibacillaceae	Paenibacillus	ASV346	0-14	3.34651e-05
205.534	7.05788	2.01456	3.50344	0.000459285	0.00238732	Bacteria	Proteobacteria	Gammaproteobacteria	Betaproteobacteriales	Burkholderiaceae	unclassified	ASV94	0-14	0.00258015
286.399	12.3275	1.3645	9.03445	1.64835e-19	7.33293e-18	Bacteria	Proteobacteria	Gammaproteobacteria	Betaproteobacteriales	Burkholderiaceae	Duganella	ASV73	0-14	1.05366e-17
379.49	4.9635	1.29619	3.82931	0.000128503	0.000777629	Bacteria	Proteobacteria	Gammaproteobacteria	Pseudomonadales	Pseudomonadaceae	Pseudomonas	ASV59	0-14	0.000792219
63.3763	27.7563	2.46556	11.2576	2.12475e-29	2.20367e-27	Bacteria	Bacteroidetes	Bacteroidia	Flavobacteriales	Weeksellaceae	Chryseobacterium	ASV238	0-14	3.52587e-27
33.7558	-5.12352	2.01564	-2.54188	0.0110258	0.0433136	Bacteria	Verrucomicrobia	Verrucomicrobiae	Verrucomicrobiales	Rubritaleaceae	Luteolibacter	ASV363	0-14	0.0486932
91.4148	5.23604	1.17823	4.444	8.83012e-06	6.66714e-05	Bacteria	Proteobacteria	Gammaproteobacteria	Betaproteobacteriales	Methylophilaceae	Methylobacillus	ASV179	0-14	6.6367e-05
43.4466	5.39304	1.71724	3.14053	0.0016864	0.00756355	Bacteria	Proteobacteria	Alphaproteobacteria	Caulobacterales	Caulobacteraceae	Brevundimonas	ASV320	0-14	0.00860053
3.27092	-23.1283	4.97538	-4.64855	3.34277e-06	2.77888e-05	Bacteria	Proteobacteria	Gammaproteobacteria	Betaproteobacteriales	SC-I-84	unclassified	ASV980	0-14	2.65486e-05
18.7302	28.4685	4.91786	5.78879	7.08946e-09	8.84875e-08	Bacteria	Proteobacteria	Alphaproteobacteria	Rhizobiales	Rhizobiaceae	unclassified	ASV534	0-14	7.94581e-08
3.85225	-17.0844	4.26575	-4.00502	6.20126e-05	0.000408291	Bacteria	Proteobacteria	Alphaproteobacteria	Rhizobiales	Xanthobacteraceae	Pseudorhodoplanes	ASV992	0-14	0.000406664
20.4138	9.03529	1.95115	4.63074	3.64359e-06	2.99868e-05	Bacteria	Proteobacteria	Alphaproteobacteria	Rhodobacterales	Rhodobacteraceae	unclassified	ASV514	0-14	2.88334e-05
1.70986	-30	4.97466	-6.03056	1.63391e-09	2.51151e-08	Bacteria	Bacteroidetes	Bacteroidia	Cytophagales	Microscillaceae	unclassified	ASV1445	0-14	2.1103e-08
1.29785	-20.0639	4.97603	-4.03211	5.52777e-05	0.000368369	Bacteria	Bacteroidetes	Bacteroidia	Chitinophagales	Saprospiraceae	unclassified	ASV1474	0-14	0.000366514
3.88859	23.5494	4.1245	5.70963	1.13221e-08	1.3703e-07	Bacteria	Bacteroidetes	Bacteroidia	Chitinophagales	Chitinophagaceae	Taibaiella	ASV1129	0-14	1.20818e-07
0.432554	17.7124	4.97428	3.56081	0.000369719	0.00196309	Bacteria	Chloroflexi	KD4-96	unclassified	unclassified	unclassified	ASV2710	0-14	0.00211856
1.99208	-16.6576	4.97656	-3.3472	0.000816309	0.0039519	Bacteria	Actinobacteria	Acidimicrobiia	Microtrichales	unclassified	unclassified	ASV1378	0-14	0.00436958
2.31479	16.5273	4.967	3.32741	0.000876563	0.00419425	Bacteria	Proteobacteria	Alphaproteobacteria	Rhizobiales	Devosiaceae	unclassified	ASV1374	0-14	0.00466556
15.733	16.2813	4.98359	3.26698	0.001087	0.00506857	Bacteria	Bacteroidetes	Bacteroidia	Sphingobacteriales	Sphingobacteriaceae	Pedobacter	ASV555	0-14	0.00570265
10.4212	-24.9439	3.485	-7.1575	8.21615e-13	1.85257e-11	Bacteria	Proteobacteria	Alphaproteobacteria	Sphingomonadales	Sphingomonadaceae	Sphingopyxis	ASV613	0-14	1.86535e-11
80.3168	10.8899	1.34484	8.09749	5.61048e-16	1.77593e-14	Bacteria	Verrucomicrobia	Verrucomicrobiae	Verrucomicrobiales	Rubritaleaceae	Luteolibacter	ASV200	0-14	2.22526e-14
3.7768	18.7761	4.95974	3.78571	0.000153273	0.000891474	Bacteria	Bacteroidetes	Bacteroidia	Cytophagales	Cytophagaceae	Cytophaga	ASV1340	0-14	0.000925824
611.541	13.339	1.17688	11.3341	8.88996e-30	1.21941e-27	Bacteria	Bacteroidetes	Bacteroidia	Sphingobacteriales	Sphingobacteriaceae	Pedobacter	ASV35	0-14	1.67233e-27
25.8971	9.23295	1.79769	5.136	2.80646e-07	2.83401e-06	Bacteria	Actinobacteria	Actinobacteria	Micrococcales	Microbacteriaceae	Agromyces	ASV456	0-14	2.49699e-06
1334.84	7.96231	0.891173	8.93465	4.08474e-19	1.72397e-17	Bacteria	Bacteroidetes	Bacteroidia	Chitinophagales	Chitinophagaceae	Chitinophaga	ASV11	0-14	2.51345e-17
380.242	9.0926	1.38391	6.57021	5.02431e-11	1.07403e-09	Bacteria	Proteobacteria	Gammaproteobacteria	Betaproteobacteriales	Burkholderiaceae	Variovorax	ASV58	0-14	9.08794e-10
92.4649	9.50804	1.5714	6.05069	1.44228e-09	2.33467e-08	Bacteria	Bacteroidetes	Bacteroidia	Flavobacteriales	Flavobacteriaceae	Flavobacterium	ASV188	0-14	1.8954e-08
81.5759	25.382	1.81572	13.979	2.09511e-44	8.26878e-42	Bacteria	Proteobacteria	Gammaproteobacteria	Pseudomonadales	Pseudomonadaceae	Pseudomonas	ASV186	0-14	9.19612e-42
324.844	25.0609	2.21623	11.3079	1.1998e-29	1.51914e-27	Bacteria	Bacteroidetes	Bacteroidia	Flavobacteriales	Weeksellaceae	Chryseobacterium	ASV71	0-14	2.135e-27
1.40685	13.5785	4.98361	2.72464	0.00643722	0.0265555	Bacteria	Bacteroidetes	Bacteroidia	Sphingobacteriales	Sphingobacteriaceae	Mucilaginibacter	ASV1757	0-14	0.029868
5.12793	-24.2867	4.97544	-4.88132	1.05379e-06	9.3759e-06	Bacteria	Bacteroidetes	Bacteroidia	Bacteroidales	unclassified	unclassified	ASV849	0-14	8.79362e-06
493.764	29.8599	1.98258	15.0611	2.9182e-51	2.40168e-48	Bacteria	Bacteroidetes	Bacteroidia	Chitinophagales	unclassified	unclassified	ASV44	0-14	1.74667e-48
1818.44	14.3006	1.10081	12.991	1.37619e-38	3.23601e-36	Bacteria	Proteobacteria	Alphaproteobacteria	Rhizobiales	Rhizobiaceae	Allorhizobium-Neorhizobium-Pararhizobium-Rhizobium	ASV8	0-14	4.11856e-36
239.597	12.5257	1.46415	8.55493	1.17936e-17	4.22005e-16	Bacteria	Bacteroidetes	Bacteroidia	Sphingobacteriales	Sphingobacteriaceae	Mucilaginibacter	ASV84	0-14	6.06632e-16
580.97	9.78398	0.900378	10.8665	1.66426e-27	1.36969e-25	Bacteria	Proteobacteria	Gammaproteobacteria	Pseudomonadales	Pseudomonadaceae	Pseudomonas	ASV37	0-14	2.28281e-25
99.3507	10.1814	2.21038	4.60617	4.10162e-06	3.32575e-05	Bacteria	Proteobacteria	Gammaproteobacteria	Enterobacteriales	Enterobacteriaceae	unclassified	ASV184	0-14	3.22257e-05
0.721574	-18.2626	4.95236	-3.68765	0.000226334	0.00125899	Bacteria	Proteobacteria	Gammaproteobacteria	Methylococcales	Methylomonaceae	Methylobacter	ASV1878	0-14	0.0013405
155.134	8.20668	1.60339	5.11834	3.08237e-07	3.03807e-06	Bacteria	Bacteroidetes	Bacteroidia	Chitinophagales	Chitinophagaceae	Taibaiella	ASV128	0-14	2.72407e-06
32.2803	-9.08315	2.15228	-4.22024	2.44042e-05	0.000171663	Bacteria	Proteobacteria	Alphaproteobacteria	Rhizobiales	Beijerinckiaceae	Camelimonas	ASV227	0-14	0.000171297
31.2182	-19.0266	2.55232	-7.45463	9.01201e-14	2.24754e-12	Bacteria	Proteobacteria	Alphaproteobacteria	Sphingomonadales	Sphingomonadaceae	Sphingobium	ASV394	0-14	2.44177e-12
132.118	8.85975	1.46438	6.05019	1.44676e-09	2.33467e-08	Bacteria	Proteobacteria	Gammaproteobacteria	Betaproteobacteriales	Burkholderiaceae	unclassified	ASV146	0-14	1.8975e-08
59.5879	10.8407	2.09589	5.17235	2.31165e-07	2.35578e-06	Bacteria	Proteobacteria	Gammaproteobacteria	Betaproteobacteriales	Burkholderiaceae	Burkholderia-Caballeronia-Paraburkholderia	ASV260	0-14	2.07356e-06
431.574	12.4686	1.30227	9.57452	1.0233e-21	5.10409e-20	Bacteria	Bacteroidetes	Bacteroidia	Flavobacteriales	Flavobacteriaceae	Flavobacterium	ASV52	0-14	8.02072e-20
312.193	-12.885	4.89749	-2.63094	0.00851488	0.0340432	Bacteria	Proteobacteria	Gammaproteobacteria	Enterobacteriales	Enterobacteriaceae	unclassified	ASV22	0-14	0.0386634
1.73035	19.2765	4.95093	3.8935	9.88081e-05	0.000623135	Bacteria	Proteobacteria	Deltaproteobacteria	Oligoflexales	Oligoflexaceae	Oligoflexus	ASV1536	0-14	0.000622538
6.25683	-20.9602	4.94869	-4.23551	2.28033e-05	0.000161786	Bacteria	Proteobacteria	Alphaproteobacteria	Rhizobiales	Xanthobacteraceae	unclassified	ASV850	0-14	0.000160575
6.13077	9.09013	3.34208	2.7199	0.00653013	0.0268715	Bacteria	Proteobacteria	Alphaproteobacteria	Acetobacterales	Acetobacteraceae	Acetobacter	ASV933	0-14	0.0302564
29.9231	10.1206	2.35264	4.3018	1.69417e-05	0.000122307	Bacteria	Proteobacteria	Gammaproteobacteria	Betaproteobacteriales	Burkholderiaceae	unclassified	ASV415	0-14	0.000121906
2452.97	5.61026	0.764255	7.34082	2.12295e-13	5.0643e-12	Bacteria	Proteobacteria	Gammaproteobacteria	Enterobacteriales	Enterobacteriaceae	unclassified	ASV6	0-14	5.25469e-12
6.73497	-20.8486	4.91096	-4.24532	2.18277e-05	0.000155534	Bacteria	Bacteroidetes	Bacteroidia	Chitinophagales	Chitinophagaceae	Chitinophaga	ASV834	0-14	0.000154365
32.958	10.1913	2.02221	5.0397	4.66269e-07	4.43629e-06	Bacteria	Firmicutes	Bacilli	Bacillales	Paenibacillaceae	Paenibacillus	ASV437	0-14	4.06073e-06
430.666	13.6271	1.38663	9.82749	8.5725e-23	4.70345e-21	Bacteria	Bacteroidetes	Bacteroidia	Cytophagales	Spirosomaceae	Dyadobacter	ASV54	0-14	7.4265e-21
2.74644	-20.3907	4.97567	-4.09809	4.16577e-05	0.000281018	Bacteria	Proteobacteria	Alphaproteobacteria	Rhizobiales	Rhizobiaceae	unclassified	ASV1109	0-14	0.000281596
169.299	-6.04569	1.20373	-5.02248	5.10084e-07	4.77045e-06	Bacteria	Proteobacteria	Alphaproteobacteria	Rhizobiales	Devosiaceae	Devosia	ASV103	0-14	4.40734e-06
40.4084	7.148	2.21603	3.2256	0.0012571	0.00579606	Bacteria	Bacteroidetes	Bacteroidia	Chitinophagales	Chitinophagaceae	Filimonas	ASV350	0-14	0.00652742
303.266	5.65584	1.92989	2.93065	0.00338249	0.0144613	Bacteria	Bacteroidetes	Bacteroidia	Flavobacteriales	Weeksellaceae	Chryseobacterium	ASV72	0-14	0.0164966
342.306	3.39165	0.866903	3.91238	9.13904e-05	0.000580806	Bacteria	Actinobacteria	Actinobacteria	Micrococcales	Cellulomonadaceae	Cellulomonas	ASV62	0-14	0.000579518
50.002	10.6601	2.89683	3.67992	0.000233309	0.00128437	Bacteria	Bacteroidetes	Bacteroidia	Sphingobacteriales	Sphingobacteriaceae	unclassified	ASV303	0-14	0.00137644
29.6879	7.65789	1.95419	3.91871	8.9025e-05	0.000569123	Bacteria	Bacteroidetes	Bacteroidia	Flavobacteriales	Flavobacteriaceae	unclassified	ASV443	0-14	0.00056632
0.811081	-21.8226	4.97481	-4.38661	1.1513e-05	8.57482e-05	Bacteria	Actinobacteria	Actinobacteria	unclassified	unclassified	unclassified	ASV2231	0-14	8.51701e-05
3.33318	-22.3514	4.48791	-4.98037	6.34631e-07	5.86855e-06	Bacteria	Bacteroidetes	Bacteroidia	Sphingobacteriales	Sphingobacteriaceae	unclassified	ASV1064	0-14	5.41947e-06
0.241311	-29.9434	4.97638	-6.0171	1.77565e-09	2.63308e-08	Bacteria	Proteobacteria	Deltaproteobacteria	Myxococcales	Haliangiaceae	Haliangium	ASV2777	0-14	2.26567e-08
5.669	-30	4.97426	-6.03104	1.62903e-09	2.51151e-08	Bacteria	Proteobacteria	Alphaproteobacteria	Rhizobiales	Xanthobacteraceae	unclassified	ASV769	0-14	2.1103e-08
3.05642	-18.9867	4.96979	-3.82043	0.000133221	0.000797386	Bacteria	Bacteroidetes	Bacteroidia	Sphingobacteriales	Sphingobacteriaceae	Pedobacter	ASV979	0-14	0.000816689
1.86878	-26.4153	4.94718	-5.33946	9.32215e-08	9.89952e-07	Bacteria	Chloroflexi	KD4-96	unclassified	unclassified	unclassified	ASV1270	0-14	8.64466e-07
35.2892	10.3818	2.18127	4.75952	1.94056e-06	1.67233e-05	Bacteria	Actinobacteria	Actinobacteria	Micrococcales	Microbacteriaceae	unclassified	ASV383	0-14	1.57736e-05
16.9486	-23.3945	4.94907	-4.72705	2.27801e-06	1.9428e-05	Bacteria	Proteobacteria	Gammaproteobacteria	Betaproteobacteriales	Burkholderiaceae	Ottowia	ASV400	0-14	1.8403e-05
4.38555	-19.2157	4.95363	-3.87912	0.000104836	0.000654726	Bacteria	Firmicutes	Bacilli	Bacillales	unclassified	unclassified	ASV1076	0-14	0.000657995
12.0055	16.1171	2.89498	5.56724	2.58799e-08	2.91769e-07	Bacteria	Firmicutes	Bacilli	Bacillales	Paenibacillaceae	Paenibacillus	ASV685	0-14	2.57391e-07
35.1206	9.68073	1.82319	5.30976	1.09768e-07	1.15082e-06	Bacteria	Firmicutes	Bacilli	Bacillales	Paenibacillaceae	Paenibacillus	ASV375	0-14	1.0122e-06
0.840168	-14.3937	4.96682	-2.89796	0.00375595	0.0159337	Bacteria	Bacteroidetes	Bacteroidia	Chitinophagales	Chitinophagaceae	unclassified	ASV1748	0-14	0.0182368
393.095	12.5514	1.1775	10.6594	1.5769e-26	1.23599e-24	Bacteria	Proteobacteria	Alphaproteobacteria	Sphingomonadales	Sphingomonadaceae	Sphingobium	ASV61	0-14	1.95893e-24
537.112	6.58989	0.830904	7.93099	2.17408e-15	6.27813e-14	Bacteria	Proteobacteria	Gammaproteobacteria	Pseudomonadales	Pseudomonadaceae	Pseudomonas	ASV39	0-14	7.61391e-14
257.799	12.9954	1.5046	8.63713	5.76409e-18	2.15629e-16	Bacteria	Proteobacteria	Gammaproteobacteria	Pseudomonadales	Pseudomonadaceae	Pseudomonas	ASV80	0-14	3.03606e-16
0.495777	-30	4.97779	-6.02677	1.67266e-09	2.52587e-08	Bacteria	Verrucomicrobia	Verrucomicrobiae	Pedosphaerales	Pedosphaeraceae	unclassified	ASV2310	0-14	2.14257e-08
252.538	11.519	1.41726	8.12765	4.3768e-16	1.41259e-14	Bacteria	Bacteroidetes	Bacteroidia	Flavobacteriales	Flavobacteriaceae	Flavobacterium	ASV83	0-14	1.77882e-14
39.0644	30	4.91767	6.10044	1.05774e-09	1.79488e-08	Bacteria	Bacteroidetes	Bacteroidia	Sphingobacteriales	Sphingobacteriaceae	Mucilaginibacter	ASV344	0-14	1.44484e-08
11.2137	19.0277	4.9644	3.83283	0.000126678	0.000769419	Bacteria	Proteobacteria	Gammaproteobacteria	Xanthomonadales	Xanthomonadaceae	Xanthomonas	ASV735	0-14	0.000783146
73.3597	9.63293	2.49493	3.861	0.000112925	0.000696157	Bacteria	Proteobacteria	Alphaproteobacteria	Acetobacterales	Acetobacteraceae	Acetobacter	ASV223	0-14	0.000705404
30.4097	10.15	2.99011	3.39454	0.000687452	0.0033677	Bacteria	Firmicutes	Bacilli	Bacillales	Paenibacillaceae	Paenibacillus	ASV414	0-14	0.00372832
0.885168	-18.3716	4.95219	-3.70978	0.000207436	0.00117333	Bacteria	Firmicutes	Clostridia	Clostridiales	Ruminococcaceae	unclassified	ASV1749	0-14	0.00123598
6.9422	19.1173	4.96524	3.85024	0.000118004	0.000722062	Bacteria	Proteobacteria	Gammaproteobacteria	Betaproteobacteriales	unclassified	unclassified	ASV823	0-14	0.000735738
277.944	12.7275	1.13065	11.2569	2.14209e-29	2.20367e-27	Bacteria	Proteobacteria	Gammaproteobacteria	Betaproteobacteriales	Burkholderiaceae	Herbaspirillum	ASV76	0-14	3.52587e-27
71.6383	11.819	4.3651	2.70761	0.00677695	0.0277484	Bacteria	Proteobacteria	Alphaproteobacteria	Rhizobiales	Rhizobiaceae	unclassified	ASV222	0-14	0.0313339
55.7377	10.6796	1.83328	5.82543	5.69673e-09	7.32564e-08	Bacteria	Bacteroidetes	Bacteroidia	Flavobacteriales	Weeksellaceae	Chryseobacterium	ASV293	0-14	6.50039e-08
57.9393	6.3937	1.62432	3.93623	8.2772e-05	0.000536389	Bacteria	Proteobacteria	Alphaproteobacteria	Rhizobiales	Beijerinckiaceae	Bosea	ASV262	0-14	0.000530644
3.34724	-26.5984	4.9006	-5.42759	5.71199e-08	6.22645e-07	Bacteria	Proteobacteria	Alphaproteobacteria	Rhizobiales	Rhizobiaceae	unclassified	ASV975	0-14	5.36487e-07
264.103	-19.8684	3.50217	-5.67317	1.40179e-08	1.67199e-07	Bacteria	Proteobacteria	Gammaproteobacteria	Pseudomonadales	Moraxellaceae	Acinetobacter	ASV77	0-14	1.46498e-07
2.4176	-15.4486	4.97804	-3.10334	0.00191349	0.00848949	Bacteria	Proteobacteria	Alphaproteobacteria	Reyranellales	Reyranellaceae	Reyranella	ASV1306	0-14	0.0096318
184.842	10.2757	1.23158	8.3435	7.21261e-17	2.42285e-15	Bacteria	Bacteroidetes	Bacteroidia	Chitinophagales	Chitinophagaceae	unclassified	ASV102	0-14	3.23046e-15
2.96579	15.5513	4.98559	3.11924	0.00181317	0.00806614	Bacteria	Proteobacteria	Alphaproteobacteria	Sphingomonadales	Sphingomonadaceae	unclassified	ASV1258	0-14	0.00918299
79.5467	4.82046	1.85381	2.6003	0.00931423	0.0369427	Bacteria	Proteobacteria	Gammaproteobacteria	Betaproteobacteriales	Burkholderiaceae	Xylophilus	ASV203	0-14	0.0418886
258.712	13.2162	1.31585	10.0439	9.77805e-24	5.7481e-22	Bacteria	Proteobacteria	Alphaproteobacteria	Sphingomonadales	Sphingomonadaceae	Novosphingobium	ASV79	0-14	9.46746e-22
6.83968	22.2394	4.81468	4.61909	3.85427e-06	3.14066e-05	Bacteria	Firmicutes	Bacilli	Bacillales	Paenibacillaceae	Paenibacillus	ASV905	0-14	3.0391e-05
134.467	10.3434	1.41403	7.31485	2.57678e-13	6.0591e-12	Bacteria	Bacteroidetes	Bacteroidia	Flavobacteriales	Flavobacteriaceae	Flavobacterium	ASV138	0-14	6.28352e-12
33.4749	24.025	4.95194	4.85164	1.22447e-06	1.08359e-05	Bacteria	Bacteroidetes	Bacteroidia	Flavobacteriales	Flavobacteriaceae	Flavobacterium	ASV384	0-14	1.01792e-05
29.3564	5.26543	1.79789	2.92866	0.00340425	0.0145166	Bacteria	Proteobacteria	Deltaproteobacteria	Bdellovibrionales	Bdellovibrionaceae	Bdellovibrio	ASV429	0-14	0.0165903
255.643	-30	4.89759	-6.12546	9.04216e-10	1.5553e-08	Bacteria	Proteobacteria	Alphaproteobacteria	Caulobacterales	Caulobacteraceae	Brevundimonas	ASV46	0-14	1.25334e-08
24.224	16.8635	4.52499	3.72675	0.000193965	0.00111285	Bacteria	Proteobacteria	Gammaproteobacteria	Pseudomonadales	Pseudomonadaceae	Pseudomonas	ASV452	0-14	0.00116202
30.3319	7.60836	1.68939	4.50361	6.68086e-06	5.18712e-05	Bacteria	Actinobacteria	Actinobacteria	Corynebacteriales	Nocardiaceae	Rhodococcus	ASV420	0-14	5.08518e-05
15.1511	25.0343	3.23674	7.73443	1.03868e-14	2.75753e-13	Bacteria	Firmicutes	Bacilli	Bacillales	Paenibacillaceae	Paenibacillus	ASV581	0-14	3.3037e-13
67.7365	11.6226	1.97186	5.89421	3.76476e-09	5.07934e-08	Bacteria	Proteobacteria	Alphaproteobacteria	Acetobacterales	Acetobacteraceae	Gluconacetobacter	ASV243	0-14	4.45012e-08
342.568	-6.1733	0.980621	-6.2953	3.0681e-10	5.87221e-09	Bacteria	Proteobacteria	Alphaproteobacteria	Rhizobiales	Rhizobiaceae	unclassified	ASV26	0-14	4.78682e-09
95.0903	-9.23214	1.58162	-5.83713	5.31078e-09	6.88311e-08	Bacteria	Proteobacteria	Alphaproteobacteria	Sphingomonadales	Sphingomonadaceae	Novosphingobium	ASV124	0-14	6.09167e-08
2.67068	-27.1202	4.92366	-5.50812	3.62678e-08	4.061e-07	Bacteria	Actinobacteria	Actinobacteria	Propionibacteriales	Nocardioidaceae	Aeromicrobium	ASV891	0-14	3.51675e-07
1227.76	5.08913	0.480695	10.587	3.42246e-26	2.56062e-24	Bacteria	Proteobacteria	Alphaproteobacteria	Acetobacterales	Acetobacteraceae	Acetobacter	ASV12	0-14	4.09699e-24
3.25396	-20.7216	4.96878	-4.17036	3.04113e-05	0.000209444	Bacteria	Proteobacteria	Alphaproteobacteria	Rhizobiales	Xanthobacteraceae	unclassified	ASV1055	0-14	0.000210103
492.684	8.29966	0.606072	13.6942	1.09992e-42	3.01746e-40	Bacteria	Proteobacteria	Alphaproteobacteria	Sphingomonadales	Sphingomonadaceae	Novosphingobium	ASV45	0-14	4.02327e-40
131.564	-30	4.89754	-6.12553	9.03841e-10	1.5553e-08	Bacteria	Actinobacteria	Actinobacteria	Micrococcales	Promicromonosporaceae	Cellulosimicrobium	ASV63	0-14	1.25334e-08
5.47403	-21.4106	4.90535	-4.36475	1.2727e-05	9.39404e-05	Bacteria	Proteobacteria	Alphaproteobacteria	Rhizobiales	Devosiaceae	Paradevosia	ASV743	0-14	9.33127e-05
11.8888	17.0335	3.65526	4.66001	3.162e-06	2.64196e-05	Bacteria	Bacteroidetes	Bacteroidia	Chitinophagales	Chitinophagaceae	unclassified	ASV731	0-14	2.51737e-05
71.3585	-6.78551	1.35918	-4.99235	5.96489e-07	5.54701e-06	Bacteria	Proteobacteria	Alphaproteobacteria	Caulobacterales	Caulobacteraceae	unclassified	ASV198	0-14	5.107e-06
9.86541	-25.6863	4.84555	-5.30101	1.15165e-07	1.19975e-06	Bacteria	Proteobacteria	Gammaproteobacteria	Xanthomonadales	Xanthomonadaceae	Stenotrophomonas	ASV553	0-14	1.06048e-06
374.706	11.4305	1.17556	9.72352	2.39349e-22	1.27087e-20	Bacteria	Proteobacteria	Gammaproteobacteria	Betaproteobacteriales	Burkholderiaceae	Duganella	ASV56	0-14	2.04659e-20
2895.74	4.947	0.832606	5.94159	2.8227e-09	3.89022e-08	Bacteria	Bacteroidetes	Bacteroidia	Flavobacteriales	Flavobacteriaceae	Flavobacterium	ASV3	0-14	3.43524e-08
10.2061	17.196	4.98441	3.44997	0.000560655	0.00283079	Bacteria	Proteobacteria	Gammaproteobacteria	Xanthomonadales	Xanthomonadaceae	SN8	ASV792	0-14	0.00309417
44.0894	9.55337	1.47009	6.49848	8.11338e-11	1.64872e-09	Bacteria	Proteobacteria	Deltaproteobacteria	Bdellovibrionales	Bacteriovoracaceae	Peredibacter	ASV329	0-14	1.39111e-09
234.576	4.53942	1.6252	2.79315	0.00521977	0.0217512	Bacteria	Bacteroidetes	Bacteroidia	Bacteroidales	Dysgonomonadaceae	Dysgonomonas	ASV88	0-14	0.0246182
693.407	15.1491	1.27894	11.845	2.28296e-32	3.75776e-30	Bacteria	Bacteroidetes	Bacteroidia	Sphingobacteriales	Sphingobacteriaceae	unclassified	ASV30	0-14	4.84872e-30
147.264	10.232	1.23902	8.25813	1.47968e-16	4.87111e-15	Bacteria	Bacteroidetes	Bacteroidia	Chitinophagales	Chitinophagaceae	unclassified	ASV125	0-14	6.49481e-15
536.144	13.8721	1.24006	11.1867	4.7397e-29	4.58915e-27	Bacteria	Bacteroidetes	Bacteroidia	Flavobacteriales	Weeksellaceae	Chryseobacterium	ASV42	0-14	7.61127e-27
3.64672	13.3417	4.97523	2.68163	0.00732647	0.0297762	Bacteria	Actinobacteria	Actinobacteria	Propionibacteriales	Nocardioidaceae	Nocardioides	ASV1168	0-14	0.0337
0.372822	16.9289	4.9759	3.40219	0.000668484	0.00328455	Bacteria	Proteobacteria	Gammaproteobacteria	Betaproteobacteriales	Procabacteriaceae	Procabacter	ASV3510	0-14	0.00363144
153.367	11.7625	1.35337	8.69127	3.58417e-18	1.43891e-16	Bacteria	Proteobacteria	Alphaproteobacteria	Sphingomonadales	Sphingomonadaceae	unclassified	ASV119	0-14	1.99984e-16
16.2436	9.09621	2.89069	3.14673	0.00165107	0.00746612	Bacteria	Proteobacteria	Gammaproteobacteria	Xanthomonadales	Rhodanobacteraceae	Luteibacter	ASV579	0-14	0.00844652
29.4136	-7.09081	2.50694	-2.82847	0.00467717	0.0195396	Bacteria	Proteobacteria	Alphaproteobacteria	Sphingomonadales	Sphingomonadaceae	Sphingobium	ASV337	0-14	0.0222664
184.566	3.11562	0.901397	3.45643	0.000547373	0.00277846	Bacteria	Firmicutes	Bacilli	Lactobacillales	Leuconostocaceae	Oenococcus	ASV98	0-14	0.00302595
10.4293	21.9772	3.79661	5.78863	7.0962e-09	8.84875e-08	Bacteria	Bacteroidetes	Bacteroidia	Flavobacteriales	Crocinitomicaceae	Fluviicola	ASV738	0-14	7.94581e-08
137.289	3.54566	1.16589	3.04117	0.00235658	0.0102617	Bacteria	Bacteroidetes	Bacteroidia	Sphingobacteriales	Sphingobacteriaceae	Pedobacter	ASV130	0-14	0.0116923
0.695853	14.4155	4.98944	2.88921	0.00386215	0.0163002	Bacteria	Firmicutes	Bacilli	Bacillales	unclassified	unclassified	ASV2406	0-14	0.0186973
4.37479	17.0641	4.95788	3.44182	0.000577819	0.00290853	Bacteria	Proteobacteria	Gammaproteobacteria	Xanthomonadales	Xanthomonadaceae	Stenotrophomonas	ASV1079	0-14	0.00318623
48.4318	11.9429	4.01999	2.97087	0.00296958	0.0127622	Bacteria	Proteobacteria	Alphaproteobacteria	Acetobacterales	Acetobacteraceae	Gluconobacter	ASV205	0-14	0.0145583
4.93835	-23.489	4.97537	-4.72106	2.34615e-06	1.9906e-05	Bacteria	Bacteroidetes	Bacteroidia	Flavobacteriales	Weeksellaceae	unclassified	ASV882	0-14	1.88861e-05
28.0042	13.6381	3.96742	3.43752	0.000587077	0.00293717	Bacteria	Bacteroidetes	Bacteroidia	Flavobacteriales	Flavobacteriaceae	Flavobacterium	ASV435	0-14	0.00323187
354.287	-4.56511	0.905232	-5.04303	4.58215e-07	4.38501e-06	Bacteria	Proteobacteria	Alphaproteobacteria	Rhizobiales	Rhizobiaceae	Brucella	ASV25	0-14	3.99588e-06
33.0718	9.43871	2.00453	4.70868	2.49325e-06	2.10456e-05	Bacteria	Bacteroidetes	Bacteroidia	Flavobacteriales	Weeksellaceae	Chryseobacterium	ASV413	0-14	2.0019e-05
787.055	8.72079	1.14604	7.60948	2.75194e-14	6.96875e-13	Bacteria	Proteobacteria	Gammaproteobacteria	Pseudomonadales	Pseudomonadaceae	Pseudomonas	ASV27	0-14	8.05278e-13
51.5113	9.45203	1.82761	5.17179	2.31857e-07	2.35578e-06	Bacteria	Bacteroidetes	Bacteroidia	Flavobacteriales	Flavobacteriaceae	Flavobacterium	ASV312	0-14	2.07694e-06
1131.69	9.85897	0.882446	11.1723	5.57029e-29	5.09372e-27	Bacteria	Proteobacteria	Alphaproteobacteria	Rhizobiales	Rhizobiaceae	Allorhizobium-Neorhizobium-Pararhizobium-Rhizobium	ASV13	0-14	8.73209e-27
35.3703	11.2127	2.22551	5.03826	4.69775e-07	4.44396e-06	Bacteria	Proteobacteria	Gammaproteobacteria	Betaproteobacteriales	Burkholderiaceae	unclassified	ASV379	0-14	4.08586e-06
362.403	-3.15741	0.825903	-3.82297	0.000131852	0.000792072	Bacteria	Proteobacteria	Alphaproteobacteria	Rhizobiales	Rhizobiaceae	unclassified	ASV29	0-14	0.00080905
14.1292	-23.1676	4.94935	-4.68094	2.85561e-06	2.39813e-05	Bacteria	Bacteroidetes	Bacteroidia	Cytophagales	Spirosomaceae	Leadbetterella	ASV449	0-14	2.28449e-05
130.476	3.35775	1.26258	2.65944	0.00782695	0.031654	Bacteria	Proteobacteria	Alphaproteobacteria	Acetobacterales	Acetobacteraceae	Gluconobacter	ASV123	0-14	0.0357866
50.3275	8.51414	1.66535	5.11252	3.1789e-07	3.11457e-06	Bacteria	Proteobacteria	Gammaproteobacteria	Pseudomonadales	Pseudomonadaceae	Pseudomonas	ASV296	0-14	2.80186e-06
2.90643	-21.0097	4.92538	-4.2656	1.99364e-05	0.000143298	Bacteria	Actinobacteria	Thermoleophilia	Gaiellales	Gaiellaceae	Gaiella	ASV1121	0-14	0.000142366
9.17683	21.375	4.96398	4.30603	1.66213e-05	0.000120523	Bacteria	Proteobacteria	Alphaproteobacteria	Rhizobiales	Rhizobiaceae	unclassified	ASV857	0-14	0.000119863
13.1821	9.67108	3.65903	2.64307	0.00821585	0.0330643	Bacteria	Actinobacteria	Actinobacteria	Micrococcales	Microbacteriaceae	unclassified	ASV643	0-14	0.037383
71.9002	10.7531	1.68383	6.38611	1.70158e-10	3.37447e-09	Bacteria	Proteobacteria	Alphaproteobacteria	Sphingomonadales	Sphingomonadaceae	Novosphingobium	ASV232	0-14	2.77308e-09
9.75298	-22.1862	4.09838	-5.4134	6.18376e-08	6.65259e-07	Bacteria	Bacteroidetes	Bacteroidia	Cytophagales	Microscillaceae	Chryseolinea	ASV698	0-14	5.77501e-07
30.4243	6.09074	1.97449	3.08471	0.0020375	0.00894325	Bacteria	Bacteroidetes	Bacteroidia	Chitinophagales	Chitinophagaceae	Filimonas	ASV427	0-14	0.0101937
6.06138	16.7161	4.97304	3.36134	0.000775647	0.00376612	Bacteria	Proteobacteria	Gammaproteobacteria	Betaproteobacteriales	Burkholderiaceae	unclassified	ASV940	0-14	0.00416207
9.25868	-16.1885	4.91377	-3.29452	0.000985899	0.00466319	Bacteria	Proteobacteria	Gammaproteobacteria	Betaproteobacteriales	Burkholderiaceae	Lampropedia	ASV475	0-14	0.00521378
28.5311	6.29349	2.4618	2.55646	0.0105743	0.0416396	Bacteria	Proteobacteria	Gammaproteobacteria	Betaproteobacteriales	Methylophilaceae	unclassified	ASV419	0-14	0.046978
3.82978	17.1866	4.97323	3.45583	0.000548602	0.00277846	Bacteria	Bacteroidetes	Bacteroidia	Flavobacteriales	Flavobacteriaceae	Flavobacterium	ASV1074	0-14	0.0030302
0.3708	14.3982	4.98253	2.88974	0.00385564	0.0163002	Bacteria	Bacteroidetes	Bacteroidia	Chitinophagales	37-13	unclassified	ASV2908	0-14	0.0186796
5.12636	-29.8648	4.92125	-6.06854	1.29079e-09	2.1461e-08	Bacteria	Proteobacteria	Alphaproteobacteria	Rhizobiales	Beijerinckiaceae	28-YEA-48	ASV679	0-14	1.71688e-08
146.164	10.5014	1.36738	7.67991	1.59195e-14	4.15928e-13	Bacteria	Proteobacteria	Alphaproteobacteria	Caulobacterales	Caulobacteraceae	Brevundimonas	ASV132	0-14	4.89648e-13
166.96	4.58498	1.53508	2.98681	0.00281906	0.0121789	Bacteria	Proteobacteria	Gammaproteobacteria	Pseudomonadales	Pseudomonadaceae	Pseudomonas	ASV107	0-14	0.0138616
1.95806	-18.5236	4.95221	-3.74048	0.000183668	0.00106076	Bacteria	Acidobacteria	Acidobacteriia	Solibacterales	Solibacteraceae_(Subgroup_3)	unclassified	ASV1462	0-14	0.00110234
43.4929	9.37466	3.28648	2.85249	0.00433784	0.0182611	Bacteria	Proteobacteria	Gammaproteobacteria	Pseudomonadales	Pseudomonadaceae	Pseudomonas	ASV366	0-14	0.0208166
1.03754	-18.4495	4.95186	-3.72578	0.000194715	0.00111285	Bacteria	Proteobacteria	Gammaproteobacteria	Gammaproteobacteria_Incertae_Sedis	Unknown_Family	Acidibacter	ASV1659	0-14	0.0011644
5.49431	15.9579	4.85143	3.28933	0.00100427	0.00473649	Bacteria	Verrucomicrobia	Verrucomicrobiae	Chthoniobacterales	Terrimicrobiaceae	Terrimicrobium	ASV917	0-14	0.00530244
127.285	12.1236	1.39677	8.67972	3.96756e-18	1.55491e-16	Bacteria	Bacteroidetes	Bacteroidia	Flavobacteriales	Flavobacteriaceae	Flavobacterium	ASV143	0-14	2.17687e-16
128.872	-2.5768	0.833996	-3.0897	0.00200357	0.00884151	Bacteria	Actinobacteria	Actinobacteria	Micrococcales	Microbacteriaceae	unclassified	ASV129	0-14	0.0100457
136.109	7.16959	1.40706	5.09543	3.47953e-07	3.369e-06	Bacteria	Bacteroidetes	Bacteroidia	Cytophagales	Spirosomaceae	Dyadobacter	ASV135	0-14	3.05864e-06
438.822	13.5854	1.23518	10.9987	3.8764e-28	3.35818e-26	Bacteria	Proteobacteria	Gammaproteobacteria	Enterobacteriales	Enterobacteriaceae	unclassified	ASV51	0-14	5.8005e-26
25.8763	9.31065	3.48226	2.67374	0.00750102	0.0304105	Bacteria	Firmicutes	Bacilli	Bacillales	Paenibacillaceae	Paenibacillus	ASV470	0-14	0.0344398
61.509	11.1961	1.74376	6.42065	1.3569e-10	2.72372e-09	Bacteria	Bacteroidetes	Bacteroidia	Sphingobacteriales	Sphingobacteriaceae	Mucilaginibacter	ASV248	0-14	2.25033e-09
38.6124	6.73243	2.44096	2.75811	0.00581358	0.0241037	Bacteria	Proteobacteria	Alphaproteobacteria	Rhizobiales	Rhizobiaceae	unclassified	ASV371	0-14	0.0272044
23.4399	17.4577	4.46531	3.90964	9.24339e-05	0.000585178	Bacteria	Bacteroidetes	Bacteroidia	Chitinophagales	Chitinophagaceae	Taibaiella	ASV497	0-14	0.000584054
66.9458	5.20027	1.75531	2.9626	0.00305055	0.013076	Bacteria	Proteobacteria	Alphaproteobacteria	Caulobacterales	Caulobacteraceae	Brevundimonas	ASV257	0-14	0.014944
40.8852	9.47958	1.63885	5.78428	7.28233e-09	9.01257e-08	Bacteria	Bacteroidetes	Bacteroidia	Cytophagales	Spirosomaceae	Dyadobacter	ASV351	0-14	8.10657e-08
15.2744	30	4.92727	6.08857	1.13926e-09	1.91349e-08	Bacteria	Firmicutes	Clostridia	Clostridiales	Lachnospiraceae	Anaerocolumna	ASV677	0-14	1.54339e-08
133.738	9.61314	1.46375	6.56748	5.11729e-11	1.07988e-09	Bacteria	Bacteroidetes	Bacteroidia	Chitinophagales	Chitinophagaceae	unclassified	ASV133	0-14	9.20553e-10
20.2293	-30	4.89594	-6.12752	8.92588e-10	1.5553e-08	Bacteria	Proteobacteria	Alphaproteobacteria	Rhizobiales	Beijerinckiaceae	Bosea	ASV313	0-14	1.25305e-08
212.261	10.7324	1.16526	9.21035	3.25072e-20	1.52877e-18	Bacteria	Proteobacteria	Alphaproteobacteria	Caulobacterales	Caulobacteraceae	Brevundimonas	ASV96	0-14	2.22945e-18
13.2157	9.17893	3.61405	2.53979	0.0110918	0.0434693	Bacteria	Bacteroidetes	Bacteroidia	unclassified	unclassified	unclassified	ASV649	0-14	0.0489467
1.69049	-19.4377	4.94994	-3.92686	8.60619e-05	0.000555521	Bacteria	Proteobacteria	Alphaproteobacteria	Dongiales	Dongiaceae	Dongia	ASV1312	0-14	0.000550547
83.3184	10.5041	1.87168	5.61214	1.99842e-08	2.2843e-07	Bacteria	Bacteroidetes	Bacteroidia	Sphingobacteriales	Sphingobacteriaceae	unclassified	ASV197	0-14	2.02736e-07
0.22888	-18.8451	4.94933	-3.8076	0.000140321	0.000833604	Bacteria	Actinobacteria	Actinobacteria	Corynebacteriales	Tsukamurellaceae	Tsukamurella	ASV3046	0-14	0.000856233
131.725	8.66848	3.12434	2.7745	0.00552869	0.0229804	Bacteria	Proteobacteria	Gammaproteobacteria	Enterobacteriales	Enterobacteriaceae	unclassified	ASV160	0-14	0.0259821
18.8157	-18.4429	3.00062	-6.14636	7.92832e-10	1.43407e-08	Bacteria	Proteobacteria	Alphaproteobacteria	Rhizobiales	Rhizobiaceae	Allorhizobium-Neorhizobium-Pararhizobium-Rhizobium	ASV504	0-14	1.125e-08
404.809	2.75427	0.880376	3.12852	0.00175691	0.00783705	Bacteria	Proteobacteria	Gammaproteobacteria	Xanthomonadales	Xanthomonadaceae	Stenotrophomonas	ASV53	0-14	0.00891864
2.45877	13.1314	4.83051	2.71843	0.00655923	0.0269239	Bacteria	Bacteroidetes	Bacteroidia	Sphingobacteriales	Sphingobacteriaceae	Pedobacter	ASV1388	0-14	0.0303486
1.09481	-18.7637	4.95082	-3.79002	0.000150637	0.000881322	Bacteria	Bacteroidetes	Bacteroidia	Sphingobacteriales	Sphingobacteriaceae	unclassified	ASV1514	0-14	0.000913257
1.80261	-20.032	4.97859	-4.02363	5.73073e-05	0.000378827	Bacteria	Actinobacteria	Actinobacteria	Frankiales	Nakamurellaceae	Nakamurella	ASV1437	0-14	0.000378447
112.024	9.95752	1.25298	7.94707	1.90968e-15	5.6131e-14	Bacteria	Proteobacteria	Alphaproteobacteria	Rhizobiales	Rhizobiaceae	unclassified	ASV157	0-14	6.72371e-14
28.0529	24.5785	2.3761	10.3441	4.45262e-25	3.05376e-23	Bacteria	Bacteroidetes	Bacteroidia	Flavobacteriales	Weeksellaceae	Empedobacter	ASV458	0-14	4.96882e-23
3.17381	24.2346	4.95524	4.89069	1.00481e-06	8.98869e-06	Bacteria	Proteobacteria	Alphaproteobacteria	Rhizobiales	Rhizobiaceae	unclassified	ASV1218	0-14	8.42762e-06
111.675	9.66562	1.23346	7.83619	4.64434e-15	1.25321e-13	Bacteria	Proteobacteria	Alphaproteobacteria	Rhizobiales	Rhizobiaceae	Pseudochrobactrum	ASV153	0-14	1.58437e-13
5.08349	18.9092	4.55942	4.14727	3.36456e-05	0.000230753	Bacteria	Bacteroidetes	Bacteroidia	Sphingobacteriales	Sphingobacteriaceae	Pedobacter	ASV1061	0-14	0.000230994
41.8457	5.84865	1.67877	3.48389	0.000494188	0.00253406	Bacteria	Proteobacteria	Gammaproteobacteria	Betaproteobacteriales	Burkholderiaceae	Herminiimonas	ASV340	0-14	0.0027574
3.83141	16.1586	4.97363	3.24885	0.00115874	0.00535753	Bacteria	Verrucomicrobia	Verrucomicrobiae	Verrucomicrobiales	Rubritaleaceae	Luteolibacter	ASV1063	0-14	0.0060357
5.31167	27.0979	4.72371	5.73656	9.66178e-09	1.17802e-07	Bacteria	Proteobacteria	Alphaproteobacteria	Acetobacterales	Acetobacteraceae	unclassified	ASV997	0-14	1.03943e-07
35.3589	8.33845	1.83098	4.55409	5.26125e-06	4.16347e-05	Bacteria	Proteobacteria	Gammaproteobacteria	Betaproteobacteriales	Methylophilaceae	Methylophilus	ASV372	0-14	4.0753e-05
8.73289	-29.5401	4.94698	-5.97133	2.35321e-09	3.31058e-08	Bacteria	Firmicutes	Clostridia	Clostridiales	Lachnospiraceae	Anaerocolumna	ASV774	0-14	2.90685e-08
3.24057	28.9252	4.6172	6.26467	3.73613e-10	4.45629e-09	Bacteria	Proteobacteria	Gammaproteobacteria	Xanthomonadales	Xanthomonadaceae	Pseudoxanthomonas	ASV1177	14-28	5.68099e-09
40.2905	5.79489	2.04459	2.83425	0.00459334	0.0233353	Bacteria	Proteobacteria	Alphaproteobacteria	Acetobacterales	Acetobacteraceae	Roseococcus	ASV332	14-28	0.0219149
3.55771	34.3225	4.59861	7.46365	8.41551e-14	1.75842e-12	Bacteria	Verrucomicrobia	Verrucomicrobiae	Verrucomicrobiales	Rubritaleaceae	unclassified	ASV1261	14-28	2.30565e-12
0.917814	-29.4627	4.61898	-6.3786	1.78712e-10	2.22848e-09	Bacteria	Firmicutes	Bacilli	Bacillales	Paenibacillaceae	unclassified	ASV1963	14-28	2.89101e-09
0.920445	18.6333	4.61772	4.03517	5.45625e-05	0.000346756	Bacteria	Proteobacteria	Alphaproteobacteria	Sphingomonadales	Sphingomonadaceae	unclassified	ASV1648	14-28	0.000363235
0.435874	27.0866	4.62292	5.85919	4.65131e-09	4.72596e-08	Bacteria	Proteobacteria	Gammaproteobacteria	unclassified	unclassified	unclassified	ASV3100	14-28	5.38212e-08
1.87242	18.1345	4.63534	3.91222	9.1452e-05	0.000568037	Bacteria	Actinobacteria	Actinobacteria	Micrococcales	Microbacteriaceae	Leucobacter	ASV1156	14-28	0.000579518
2.60606	-31.0513	4.37012	-7.10536	1.20007e-12	1.97532e-11	Bacteria	Proteobacteria	Alphaproteobacteria	Sphingomonadales	Sphingomonadaceae	Sphingomonas	ASV1296	14-28	2.66935e-11
4.7738	29.723	4.63463	6.41324	1.4246e-10	1.80376e-09	Bacteria	Bacteroidetes	Bacteroidia	Chitinophagales	Chitinophagaceae	unclassified	ASV970	14-28	2.35076e-09
1.31932	34.33	4.59985	7.46328	8.43956e-14	1.75842e-12	Bacteria	Bacteroidetes	Bacteroidia	Chitinophagales	Chitinophagaceae	unclassified	ASV1647	14-28	2.30565e-12
3.4188	30.183	4.61696	6.53741	6.25917e-11	8.3761e-10	Bacteria	Bacteroidetes	Bacteroidia	Chitinophagales	Chitinophagaceae	unclassified	ASV1093	14-28	1.10188e-09
2.02423	-32.089	4.61737	-6.94964	3.66215e-12	5.6867e-11	Bacteria	Proteobacteria	Gammaproteobacteria	Betaproteobacteriales	Burkholderiaceae	Burkholderia-Caballeronia-Paraburkholderia	ASV1421	14-28	7.75293e-11
108.99	10.2737	1.18245	8.68847	3.67358e-18	1.51168e-16	Bacteria	Bacteroidetes	Bacteroidia	Chitinophagales	Chitinophagaceae	unclassified	ASV161	14-28	2.03251e-16
147.325	10.1155	1.32453	7.63702	2.22311e-14	5.15385e-13	Bacteria	Verrucomicrobia	Verrucomicrobiae	Verrucomicrobiales	Rubritaleaceae	Luteolibacter	ASV108	14-28	6.62305e-13
95.9359	10.0728	1.45511	6.92235	4.44209e-12	6.77008e-11	Bacteria	Verrucomicrobia	Verrucomicrobiae	Verrucomicrobiales	Verrucomicrobiaceae	Prosthecobacter	ASV175	14-28	9.2261e-11
3.35069	-25.0615	4.56305	-5.49226	3.96821e-08	3.58883e-07	Bacteria	Proteobacteria	unclassified	unclassified	unclassified	unclassified	ASV1151	14-28	3.82528e-07
666.591	-3.4746	0.81211	-4.27849	1.88165e-05	0.000127984	Bacteria	Proteobacteria	Gammaproteobacteria	Betaproteobacteriales	Burkholderiaceae	unclassified	ASV33	14-28	0.000134661
225.567	7.14793	1.88795	3.78608	0.000153041	0.000929539	Bacteria	Bacteroidetes	Bacteroidia	Cytophagales	Spirosomaceae	Dyadobacter	ASV85	14-28	0.000925271
151.128	6.89561	1.87829	3.67122	0.000241394	0.00144738	Bacteria	Bacteroidetes	Bacteroidia	Sphingobacteriales	Sphingobacteriaceae	unclassified	ASV109	14-28	0.00142286
4578.44	-3.05879	0.7353	-4.15992	3.18353e-05	0.000209603	Bacteria	Bacteroidetes	Bacteroidia	Chitinophagales	unclassified	unclassified	ASV1	14-28	0.000219089
138.03	8.65305	1.16491	7.42805	1.10211e-13	2.1342e-12	Bacteria	Proteobacteria	Alphaproteobacteria	Rhizobiales	Xanthobacteraceae	Rhodopseudomonas	ASV120	14-28	2.88045e-12
149.719	8.62097	1.4601	5.90438	3.5398e-09	3.66447e-08	Bacteria	Proteobacteria	Gammaproteobacteria	Betaproteobacteriales	Burkholderiaceae	Hydrogenophaga	ASV114	14-28	4.22211e-08
71.1293	9.26666	1.42788	6.4898	8.59511e-11	1.11398e-09	Bacteria	Bacteroidetes	Bacteroidia	Sphingobacteriales	Sphingobacteriaceae	Solitalea	ASV219	14-28	1.45851e-09
13.1987	21.4494	2.94802	7.27587	3.44201e-13	6.09198e-12	Bacteria	Bacteroidetes	Bacteroidia	Cytophagales	Spirosomaceae	Leadbetterella	ASV635	14-28	8.24079e-12
19.6105	6.63028	2.39449	2.76897	0.00562334	0.0278796	Bacteria	Proteobacteria	Alphaproteobacteria	Rhizobiales	Beijerinckiaceae	Bosea	ASV474	14-28	0.0263517
11.2423	35.8208	4.59749	7.79138	6.62825e-15	1.67848e-13	Bacteria	Proteobacteria	Alphaproteobacteria	Rhizobiales	Kaistiaceae	Kaistia	ASV686	14-28	2.17116e-13
40.1941	9.55678	1.95717	4.88295	1.04508e-06	8.0761e-06	Bacteria	Verrucomicrobia	Verrucomicrobiae	Chthoniobacterales	Terrimicrobiaceae	Terrimicrobium	ASV365	14-28	8.73203e-06
12.4903	-8.21516	3.20392	-2.5641	0.0103444	0.048648	Bacteria	Proteobacteria	Gammaproteobacteria	Enterobacteriales	Enterobacteriaceae	unclassified	ASV617	14-28	0.0460495
61.4525	4.31548	1.19452	3.61272	0.000302997	0.00178757	Bacteria	Firmicutes	Clostridia	Clostridiales	Clostridiaceae_1	Clostridium_sensu_stricto_3	ASV277	14-28	0.0017561
35.9578	6.70246	1.97529	3.39316	0.000690924	0.0038421	Bacteria	Bacteroidetes	Bacteroidia	Sphingobacteriales	Sphingobacteriaceae	Pedobacter	ASV356	14-28	0.00374099
7.0195	11.7161	4.12054	2.84335	0.00446421	0.0228536	Bacteria	Proteobacteria	Gammaproteobacteria	Betaproteobacteriales	Burkholderiaceae	unclassified	ASV899	14-28	0.0213763
26.6178	41.8194	2.24258	18.6479	1.31453e-77	7.21241e-75	Bacteria	Bacteroidetes	Bacteroidia	Chitinophagales	Chitinophagaceae	unclassified	ASV476	14-28	1.44248e-74
10.6988	-39.7424	4.5638	-8.70818	3.08792e-18	1.30326e-16	Bacteria	Actinobacteria	Actinobacteria	Micrococcales	Microbacteriaceae	Curtobacterium	ASV725	14-28	1.73768e-16
13.9691	37.6111	3.20553	11.7332	8.61318e-32	1.28884e-29	Bacteria	Bacteroidetes	Bacteroidia	Sphingobacteriales	Sphingobacteriaceae	Sphingobacterium	ASV630	14-28	1.77216e-29
4.02651	32.9242	4.61569	7.13311	9.81287e-13	1.64816e-11	Bacteria	Bacteroidetes	Bacteroidia	Bacteroidales	Dysgonomonadaceae	Dysgonomonas	ASV1040	14-28	2.19755e-11
6.22437	21.8837	4.38228	4.99367	5.92436e-07	4.85149e-06	Bacteria	Proteobacteria	Alphaproteobacteria	Caulobacterales	Caulobacteraceae	Brevundimonas	ASV752	14-28	5.0789e-06
9.1217	46.4275	3.62723	12.7997	1.646e-37	3.87044e-35	Bacteria	Proteobacteria	Alphaproteobacteria	Azospirillales	Azospirillaceae	Azospirillum	ASV759	14-28	4.71185e-35
14.8908	7.36289	2.58994	2.84288	0.00447075	0.0228536	Bacteria	Bacteroidetes	Bacteroidia	Sphingobacteriales	Sphingobacteriaceae	Mucilaginibacter	ASV590	14-28	0.021392
10.4457	47.0692	3.83195	12.2833	1.11304e-34	2.03563e-32	Bacteria	Bacteroidetes	Bacteroidia	Cytophagales	Spirosomaceae	Dyadobacter	ASV723	14-28	2.71417e-32
13.5569	36.1518	3.34133	10.8196	2.78015e-27	2.86008e-25	Bacteria	Actinobacteria	Actinobacteria	Micrococcales	Microbacteriaceae	unclassified	ASV693	14-28	3.6609e-25
7.5878	30.6953	4.61662	6.64888	2.9534e-11	4.01759e-10	Bacteria	Proteobacteria	Gammaproteobacteria	Enterobacteriales	Enterobacteriaceae	unclassified	ASV847	14-28	5.46212e-10
10.8794	37.3669	4.61732	8.09277	5.83229e-16	1.80901e-14	Bacteria	Bacteroidetes	Bacteroidia	Chitinophagales	Chitinophagaceae	Filimonas	ASV707	14-28	2.29939e-14
0.49372	26.9937	4.62536	5.83603	5.34597e-09	5.39844e-08	Bacteria	Proteobacteria	Alphaproteobacteria	Rhizobiales	Beijerinckiaceae	unclassified	ASV2591	14-28	6.12136e-08
0.801137	-31.5188	4.63082	-6.80631	1.00132e-11	1.45856e-10	Bacteria	Proteobacteria	Alphaproteobacteria	Azospirillales	Azospirillaceae	Azospirillum	ASV2065	14-28	1.98575e-10
6.3315	39.4765	4.56418	8.6492	5.18621e-18	2.08207e-16	Bacteria	Bacteroidetes	Bacteroidia	Sphingobacteriales	Sphingobacteriaceae	unclassified	ASV943	14-28	2.7761e-16
50.5102	3.97263	1.56572	2.53725	0.0111727	0.052097	Bacteria	Acidobacteria	Blastocatellia_(Subgroup_4)	Blastocatellales	Blastocatellaceae	Blastocatella	ASV290	14-28	0.0492375
8.48729	-31.1671	4.59857	-6.77755	1.2223e-11	1.76483e-10	Bacteria	Firmicutes	Clostridia	Clostridiales	Peptostreptococcaceae	Romboutsia	ASV620	14-28	2.40227e-10
1.81268	32.5586	4.6231	7.0426	1.88686e-12	2.98632e-11	Bacteria	Proteobacteria	Alphaproteobacteria	Sphingomonadales	Sphingomonadaceae	Sphingobium	ASV1435	14-28	4.07315e-11
58.7837	8.30032	1.32109	6.28295	3.32211e-10	4.05052e-09	Bacteria	Bacteroidetes	Bacteroidia	Sphingobacteriales	Sphingobacteriaceae	Pedobacter	ASV258	14-28	5.14654e-09
44.8925	6.83119	1.33573	5.11419	3.15087e-07	2.65966e-06	Bacteria	Proteobacteria	Alphaproteobacteria	Caulobacterales	Caulobacteraceae	Caulobacter	ASV323	14-28	2.78088e-06
20.739	22.0447	4.55237	4.84245	1.28245e-06	9.8182e-06	Bacteria	Proteobacteria	Alphaproteobacteria	Acetobacterales	Acetobacteraceae	Roseococcus	ASV374	14-28	1.06343e-05
7.14914	28.891	4.60058	6.27985	3.38895e-10	4.10163e-09	Bacteria	Bacteroidetes	Bacteroidia	Flavobacteriales	Flavobacteriaceae	Flavobacterium	ASV858	14-28	5.2255e-09
75.9834	8.45004	1.27067	6.65009	2.92924e-11	4.01759e-10	Bacteria	FBP	unclassified	unclassified	unclassified	unclassified	ASV199	14-28	5.4327e-10
0.876363	-33.029	4.60342	-7.17486	7.23787e-13	1.2282e-11	Bacteria	Proteobacteria	Alphaproteobacteria	Rhodospirillales	unclassified	unclassified	ASV2022	14-28	1.67207e-11
1.39941	28.4716	4.60011	6.18933	6.04223e-10	6.90661e-09	Bacteria	Proteobacteria	Alphaproteobacteria	Acetobacterales	Acetobacteraceae	Roseomonas	ASV1660	14-28	8.84046e-09
24.7415	5.83182	2.3	2.53557	0.0112263	0.0521992	Bacteria	Bacteroidetes	Bacteroidia	Chitinophagales	Chitinophagaceae	Taibaiella	ASV448	14-28	0.0494408
18.5042	8.17678	2.82378	2.89569	0.00378327	0.0195212	Bacteria	Bacteroidetes	Bacteroidia	Flavobacteriales	Weeksellaceae	Chryseobacterium	ASV547	14-28	0.018356
1.71188	-34.7699	4.58314	-7.58649	3.28691e-14	7.31115e-13	Bacteria	Proteobacteria	Gammaproteobacteria	Legionellales	Legionellaceae	Legionella	ASV1537	14-28	9.53349e-13
15.0162	-41.3034	4.56297	-9.05186	1.40551e-19	6.80432e-18	Bacteria	Bacteroidetes	Bacteroidia	Chitinophagales	Chitinophagaceae	unclassified	ASV603	14-28	9.07243e-18
10.3118	32.3489	4.61569	7.00848	2.40923e-12	3.77676e-11	Bacteria	Proteobacteria	Gammaproteobacteria	Betaproteobacteriales	Burkholderiaceae	unclassified	ASV788	14-28	5.1669e-11
0.7861	18.2665	4.61958	3.95414	7.681e-05	0.00048072	Bacteria	Firmicutes	Bacilli	Bacillales	Paenibacillaceae	Paenibacillus	ASV2159	14-28	0.000494831
3.14577	34.0933	4.62683	7.36862	1.72403e-13	3.18848e-12	Bacteria	Bacteroidetes	Bacteroidia	Chitinophagales	Chitinophagaceae	unclassified	ASV1166	14-28	4.33244e-12
45.4469	35.2652	3.11351	11.3265	9.70042e-30	1.22822e-27	Bacteria	Proteobacteria	Gammaproteobacteria	Betaproteobacteriales	Burkholderiaceae	Hydrogenophaga	ASV310	14-28	1.7741e-27
54.6984	5.33866	1.80819	2.9525	0.00315215	0.0163673	Bacteria	Proteobacteria	Gammaproteobacteria	Xanthomonadales	Xanthomonadaceae	unclassified	ASV185	14-28	0.0154188
24.79	27.2879	2.67924	10.1849	2.31522e-24	2.11714e-22	Bacteria	Bacteroidetes	Bacteroidia	Chitinophagales	Chitinophagaceae	Taibaiella	ASV441	14-28	2.41958e-22
6.649	35.5395	4.42771	8.02661	1.00205e-15	2.94531e-14	Bacteria	Bacteroidetes	Bacteroidia	Chitinophagales	Chitinophagaceae	unclassified	ASV831	14-28	3.70646e-14
83.6768	7.96085	2.26548	3.51397	0.000441456	0.00253539	Bacteria	Proteobacteria	Alphaproteobacteria	Rhizobiales	Rhizobiaceae	unclassified	ASV190	14-28	0.00250348
3.49282	33.6575	4.62471	7.27775	3.39431e-13	6.07287e-12	Bacteria	Firmicutes	Bacilli	Bacillales	Paenibacillaceae	Paenibacillus	ASV1178	14-28	8.15626e-12
12.1265	33.2397	4.48608	7.40952	1.26757e-13	2.42606e-12	Bacteria	Verrucomicrobia	Verrucomicrobiae	Chthoniobacterales	Terrimicrobiaceae	Terrimicrobium	ASV636	14-28	3.27281e-12
18.7877	-42.2374	4.57992	-9.22231	2.90777e-20	1.59539e-18	Bacteria	Proteobacteria	Gammaproteobacteria	Betaproteobacteriales	Burkholderiaceae	unclassified	ASV540	14-28	2.01523e-18
57.5899	-11.9534	3.86496	-3.09275	0.00198309	0.0104957	Bacteria	Proteobacteria	Alphaproteobacteria	Acetobacterales	Acetobacteraceae	unclassified	ASV268	14-28	0.00995933
7.28581	47.2167	3.72737	12.6676	8.94546e-37	1.84053e-34	Bacteria	Proteobacteria	Gammaproteobacteria	Enterobacteriales	Enterobacteriaceae	unclassified	ASV840	14-28	2.35588e-34
3.89722	-41.8334	4.58155	-9.13083	6.7979e-20	3.39405e-18	Bacteria	Bacteroidetes	Bacteroidia	Cytophagales	Spirosomaceae	Dyadobacter	ASV1108	14-28	4.52539e-18
2.81315	30.8803	4.61642	6.68922	2.24357e-11	3.10329e-10	Bacteria	Bacteroidetes	Bacteroidia	Flavobacteriales	Flavobacteriaceae	Flavobacterium	ASV1367	14-28	4.22047e-10
50.6581	9.08091	1.63544	5.55257	2.81494e-08	2.61774e-07	Bacteria	Verrucomicrobia	Verrucomicrobiae	Verrucomicrobiales	Rubritaleaceae	unclassified	ASV297	14-28	2.77449e-07
187.637	3.93515	1.03843	3.78951	0.000150942	0.000920189	Bacteria	Bacteroidetes	Bacteroidia	Chitinophagales	Chitinophagaceae	Filimonas	ASV99	14-28	0.000913724
67.7131	7.16158	1.31456	5.44789	5.09703e-08	4.48648e-07	Bacteria	Proteobacteria	Deltaproteobacteria	Bdellovibrionales	Bdellovibrionaceae	Bdellovibrio	ASV230	14-28	4.82861e-07
13.5468	7.92908	2.77553	2.85678	0.00427964	0.0220134	Bacteria	Bacteroidetes	Bacteroidia	Cytophagales	Spirosomaceae	Dyadobacter	ASV666	14-28	0.0205673
6.7361	24.3559	4.25736	5.7209	1.05962e-08	1.01996e-07	Bacteria	Verrucomicrobia	Verrucomicrobiae	Opitutales	Opitutaceae	IMCC26134	ASV885	14-28	1.13439e-07
6.40128	34.2611	4.12317	8.30939	9.61953e-17	3.2987e-15	Bacteria	Firmicutes	Bacilli	Bacillales	Paenibacillaceae	Paenibacillus	ASV845	14-28	4.27939e-15
60.7428	8.55407	1.63396	5.23518	1.6482e-07	1.39842e-06	Bacteria	Proteobacteria	Alphaproteobacteria	Caulobacterales	Caulobacteraceae	Brevundimonas	ASV251	14-28	1.48858e-06
0.969253	28.3052	4.61983	6.1269	8.96057e-10	9.89872e-09	Bacteria	Firmicutes	Clostridia	Clostridiales	Lachnospiraceae	unclassified	ASV2021	14-28	1.25332e-08
15.6368	33.4513	4.58016	7.30352	2.80336e-13	5.07069e-12	Bacteria	Bacteroidetes	Bacteroidia	Sphingobacteriales	Sphingobacteriaceae	unclassified	ASV645	14-28	6.78578e-12
8.78223	35.9951	4.59756	7.82918	4.91056e-15	1.30368e-13	Bacteria	Verrucomicrobia	Verrucomicrobiae	Verrucomicrobiales	Rubritaleaceae	Luteolibacter	ASV754	14-28	1.65801e-13
53.5328	7.67547	1.78304	4.30472	1.67197e-05	0.000114669	Bacteria	Bacteroidetes	Bacteroidia	Chitinophagales	Chitinophagaceae	unclassified	ASV292	14-28	0.00012044
131.38	4.9441	1.02345	4.83081	1.35978e-06	1.0362e-05	Bacteria	Proteobacteria	Alphaproteobacteria	Caulobacterales	Caulobacteraceae	Caulobacter	ASV141	14-28	1.12472e-05
20.6605	-37.404	4.59781	-8.13517	4.11353e-16	1.30209e-14	Bacteria	Firmicutes	Bacilli	Lactobacillales	Lactobacillaceae	Lactobacillus	ASV412	14-28	1.68221e-14
2.18568	30.1636	4.61677	6.53348	6.42584e-11	8.52979e-10	Bacteria	Bacteroidetes	Bacteroidia	Chitinophagales	Chitinophagaceae	Filimonas	ASV1420	14-28	1.12821e-09
63.7853	34.8276	1.9882	17.5172	1.05911e-68	4.35826e-66	Bacteria	Proteobacteria	Gammaproteobacteria	Betaproteobacteriales	Burkholderiaceae	unclassified	ASV240	14-28	9.96173e-66
5.42234	26.0313	4.58829	5.67343	1.39968e-08	1.33172e-07	Bacteria	Firmicutes	Bacilli	Bacillales	Paenibacillaceae	Cohnella	ASV958	14-28	1.46498e-07
8.98215	31.1991	4.19615	7.43517	1.04433e-13	2.07104e-12	Bacteria	Bacteroidetes	Bacteroidia	Chitinophagales	Chitinophagaceae	Taibaiella	ASV724	14-28	2.77252e-12
0.985252	37.392	4.59221	8.1425	3.87196e-16	1.24966e-14	Bacteria	Verrucomicrobia	Verrucomicrobiae	unclassified	unclassified	unclassified	ASV1842	14-28	1.60333e-14
22.7987	-9.03695	3.27112	-2.76264	0.00573351	0.0283404	Bacteria	Bacteroidetes	Bacteroidia	Sphingobacteriales	Sphingobacteriaceae	Sphingobacterium	ASV451	14-28	0.0268488
1.70733	38.4832	4.59509	8.37485	5.5292e-17	1.97849e-15	Bacteria	Firmicutes	Clostridia	Clostridiales	Lachnospiraceae	Anaerocolumna	ASV1597	14-28	2.52807e-15
3.30907	35.5906	4.5984	7.73978	9.95864e-15	2.41058e-13	Bacteria	Proteobacteria	Alphaproteobacteria	Sphingomonadales	Sphingomonadaceae	Sphingobium	ASV1313	14-28	3.19842e-13
0.864921	19.6975	4.6195	4.26399	2.00808e-05	0.000136021	Bacteria	Actinobacteria	Thermoleophilia	Solirubrobacterales	Solirubrobacteraceae	Conexibacter	ASV1840	14-28	0.000143242
23.4884	5.11769	1.63746	3.12538	0.00177576	0.00952084	Bacteria	unclassified	unclassified	unclassified	unclassified	unclassified	ASV501	14-28	0.00900739
64.5979	8.41826	1.3483	6.2436	4.27604e-10	5.0274e-09	Bacteria	Bacteroidetes	Bacteroidia	Cytophagales	Spirosomaceae	Dyadobacter	ASV235	14-28	6.45457e-09
4.87665	43.9351	4.58414	9.58417	9.32071e-22	6.13675e-20	Bacteria	Bacteroidetes	Bacteroidia	Sphingobacteriales	NS11-12_marine_group	unclassified	ASV1002	14-28	7.39368e-20
2.85279	-20.6364	4.61621	-4.47043	7.80619e-06	5.53836e-05	Bacteria	Firmicutes	Bacilli	Bacillales	Paenibacillaceae	Paenibacillus	ASV1200	14-28	5.88728e-05
47.6001	40.6164	4.57966	8.86887	7.3889e-19	3.47489e-17	Bacteria	Bacteroidetes	Bacteroidia	Sphingobacteriales	Sphingobacteriaceae	Pedobacter	ASV327	14-28	4.42259e-17
8.99183	39.4547	4.26236	9.25653	2.11185e-20	1.19866e-18	Bacteria	Actinobacteria	Actinobacteria	Micrococcales	Rarobacteraceae	Rarobacter	ASV765	14-28	1.51135e-18
142.088	6.29255	1.52718	4.12038	3.78248e-05	0.000247062	Bacteria	Bacteroidetes	Bacteroidia	Flavobacteriales	Weeksellaceae	Chryseobacterium	ASV127	14-28	0.000257804
40.6513	6.0741	1.97998	3.06776	0.00215671	0.0113056	Bacteria	Bacteroidetes	Bacteroidia	Bacteroidales	unclassified	unclassified	ASV370	14-28	0.0107411
133.419	7.28148	1.48158	4.91467	8.89339e-07	7.03775e-06	Bacteria	Proteobacteria	Alphaproteobacteria	Sphingomonadales	Sphingomonadaceae	Novosphingobium	ASV117	14-28	7.50693e-06
608.279	3.96273	1.1042	3.58878	0.000332227	0.00194607	Bacteria	Proteobacteria	Gammaproteobacteria	Pseudomonadales	Moraxellaceae	Acinetobacter	ASV40	14-28	0.00191372
48.3525	10.1074	2.63949	3.8293	0.000128507	0.000789263	Bacteria	Proteobacteria	Alphaproteobacteria	Caulobacterales	Caulobacteraceae	Brevundimonas	ASV325	14-28	0.000792219
0.881373	-28.4775	4.61987	-6.16412	7.08753e-10	7.99046e-09	Bacteria	Proteobacteria	Gammaproteobacteria	Legionellales	Legionellaceae	Legionella	ASV2073	14-28	1.02334e-08
71.5442	9.07323	1.26279	7.18507	6.71706e-13	1.1517e-11	Bacteria	Bacteroidetes	Bacteroidia	Flavobacteriales	Flavobacteriaceae	Flavobacterium	ASV220	14-28	1.56827e-11
1.40568	19.4667	4.61888	4.21461	2.50214e-05	0.000166069	Bacteria	Proteobacteria	Alphaproteobacteria	Rhizobiales	Xanthobacteraceae	unclassified	ASV1430	14-28	0.000174884
851.895	-3.79116	0.776109	-4.88484	1.03515e-06	8.03709e-06	Bacteria	Proteobacteria	Gammaproteobacteria	Xanthomonadales	Rhodanobacteraceae	Frateuria	ASV24	14-28	8.66005e-06
2.85598	36.5212	4.36705	8.36291	6.11898e-17	2.14294e-15	Bacteria	Bacteroidetes	Bacteroidia	Cytophagales	Spirosomaceae	Dyadobacter	ASV1239	14-28	2.77844e-15
2.80996	28.7739	4.63469	6.20837	5.35383e-10	6.24993e-09	Bacteria	Proteobacteria	Alphaproteobacteria	Sphingomonadales	Sphingomonadaceae	unclassified	ASV1256	14-28	7.9391e-09
117.882	-2.45459	0.925668	-2.6517	0.00800885	0.0387723	Bacteria	Proteobacteria	Alphaproteobacteria	Rhizobiales	Rhizobiaceae	unclassified	ASV151	14-28	0.0365168
81.1856	6.25133	1.42825	4.37692	1.20367e-05	8.35965e-05	Bacteria	Bacteroidetes	Bacteroidia	Flavobacteriales	Weeksellaceae	unclassified	ASV211	14-28	8.84481e-05
3.45296	43.4576	4.33206	10.0316	1.1068e-23	9.5884e-22	Bacteria	Bacteroidetes	Bacteroidia	Chitinophagales	Chitinophagaceae	Filimonas	ASV1147	14-28	1.05611e-21
51.0888	34.4849	2.90075	11.8883	1.36215e-32	2.2421e-30	Bacteria	Proteobacteria	Alphaproteobacteria	Sphingomonadales	Sphingomonadaceae	unclassified	ASV271	14-28	2.98946e-30
2.24131	40.0928	4.5997	8.7164	2.87181e-18	1.24395e-16	Bacteria	Proteobacteria	Alphaproteobacteria	Caulobacterales	Caulobacteraceae	Caulobacter	ASV1347	14-28	1.63e-16
91.6465	7.62794	1.98616	3.84055	0.00012276	0.000756792	Bacteria	Bacteroidetes	Bacteroidia	Sphingobacteriales	Sphingobacteriaceae	Pedobacter	ASV170	14-28	0.000761785
4.54967	34.8746	4.58115	7.61262	2.68586e-14	6.05607e-13	Bacteria	Proteobacteria	Alphaproteobacteria	Rhodobacterales	Rhodobacteraceae	unclassified	ASV973	14-28	7.89452e-13
52.1501	-5.67583	1.47448	-3.84937	0.000118421	0.000732785	Bacteria	Actinobacteria	Actinobacteria	Micrococcales	Microbacteriaceae	unclassified	ASV272	14-28	0.000737638
159.028	4.9674	1.46391	3.39323	0.000690729	0.0038421	Bacteria	Bacteroidetes	Bacteroidia	Bacteroidales	Dysgonomonadaceae	Dysgonomonas	ASV136	14-28	0.00374099
27.8751	-11.3072	4.21632	-2.68178	0.00732322	0.0356628	Bacteria	Proteobacteria	Alphaproteobacteria	Rhizobiales	Rhizobiaceae	unclassified	ASV432	14-28	0.0337
4.06573	35.987	4.59819	7.82636	5.02211e-15	1.31213e-13	Bacteria	Bacteroidetes	Bacteroidia	Cytophagales	Spirosomaceae	Leadbetterella	ASV1196	14-28	1.68551e-13
24.967	-6.55409	2.09201	-3.13292	0.00173078	0.00931003	Bacteria	Proteobacteria	Gammaproteobacteria	Betaproteobacteriales	Burkholderiaceae	unclassified	ASV331	14-28	0.00879959
0.874043	28.2725	4.62178	6.11723	9.52139e-10	1.03107e-08	Bacteria	Armatimonadetes	Fimbriimonadia	Fimbriimonadales	Fimbriimonadaceae	unclassified	ASV2330	14-28	1.30874e-08
174.766	10.9243	1.35024	8.09065	5.93478e-16	1.80901e-14	Bacteria	Bacteroidetes	Bacteroidia	Sphingobacteriales	Sphingobacteriaceae	Pedobacter	ASV105	14-28	2.32587e-14
53.2373	8.47514	1.38352	6.12579	9.02328e-10	9.90155e-09	Bacteria	Proteobacteria	Alphaproteobacteria	Caulobacterales	Caulobacteraceae	Brevundimonas	ASV266	14-28	1.25334e-08
24.0259	5.99007	1.90917	3.13753	0.00170377	0.00919477	Bacteria	Bacteroidetes	Bacteroidia	Cytophagales	Cytophagaceae	Cytophaga	ASV467	14-28	0.00868237
3.34957	33.9798	4.59866	7.38905	1.47879e-13	2.7978e-12	Bacteria	Proteobacteria	Alphaproteobacteria	Sphingomonadales	Sphingomonadaceae	unclassified	ASV1220	14-28	3.75921e-12
91.1869	8.43539	1.2245	6.88886	5.62406e-12	8.41564e-11	Bacteria	Verrucomicrobia	Verrucomicrobiae	Chthoniobacterales	Chthoniobacteraceae	LD29	ASV182	14-28	1.14996e-10
39.6473	6.51141	1.73054	3.76265	0.000168124	0.00101367	Bacteria	Proteobacteria	Alphaproteobacteria	Sphingomonadales	Sphingomonadaceae	Sphingopyxis	ASV347	14-28	0.00101089
8.22611	40.2774	3.63459	11.0817	1.53949e-28	1.80999e-26	Bacteria	Bacteroidetes	Bacteroidia	Chitinophagales	Chitinophagaceae	unclassified	ASV779	14-28	2.3572e-26
63.8943	-4.14778	1.48741	-2.78859	0.00529382	0.0264852	Bacteria	Actinobacteria	Actinobacteria	Micrococcales	Microbacteriaceae	Galbitalea	ASV204	14-28	0.0249317
1.14669	26.6214	4.61798	5.76472	8.17959e-09	8.1106e-08	Bacteria	Bacteroidetes	Bacteroidia	Bacteroidales	Dysgonomonadaceae	Dysgonomonas	ASV1674	14-28	9.00575e-08
4.91072	32.2569	4.16137	7.7515	9.08152e-15	2.23107e-13	Bacteria	Proteobacteria	Gammaproteobacteria	Betaproteobacteriales	Burkholderiaceae	unclassified	ASV1003	14-28	2.93101e-13
0.943012	25.6415	4.62375	5.54562	2.92922e-08	2.70871e-07	Bacteria	Bacteroidetes	Bacteroidia	Sphingobacteriales	NS11-12_marine_group	unclassified	ASV2001	14-28	2.87851e-07
2421.35	4.53449	1.02165	4.43838	9.0639e-06	6.40308e-05	Bacteria	Proteobacteria	Gammaproteobacteria	Pseudomonadales	Moraxellaceae	Acinetobacter	ASV5	14-28	6.79689e-05
117.113	9.60962	1.29242	7.43539	1.0426e-13	2.07104e-12	Bacteria	Proteobacteria	Gammaproteobacteria	Betaproteobacteriales	Burkholderiaceae	Pseudorhodoferax	ASV152	14-28	2.77252e-12
56.6945	4.00439	1.5364	2.60635	0.00915125	0.0438915	Bacteria	Bacteroidetes	Bacteroidia	Sphingobacteriales	Sphingobacteriaceae	Nubsella	ASV295	14-28	0.0412119
2.75523	32.7838	4.60381	7.12102	1.0713e-12	1.78117e-11	Bacteria	Bacteroidetes	Bacteroidia	Cytophagales	Cytophagaceae	Cytophaga	ASV1225	14-28	2.39099e-11
60.6459	7.15398	1.453	4.9236	8.49677e-07	6.78284e-06	Bacteria	Bacteroidetes	Bacteroidia	Chitinophagales	Chitinophagaceae	Taibaiella	ASV247	14-28	7.19058e-06
32.5557	6.43682	1.75353	3.67078	0.000241816	0.00144738	Bacteria	Bacteroidetes	Bacteroidia	Cytophagales	Spirosomaceae	Dyadobacter	ASV395	14-28	0.00142407
102.192	2.4328	0.943079	2.57964	0.00989032	0.0469149	Bacteria	Bacteroidetes	Bacteroidia	Cytophagales	Spirosomaceae	Dyadobacter	ASV165	14-28	0.0442377
2.05285	20.9147	4.61691	4.53001	5.89801e-06	4.2767e-05	Bacteria	Proteobacteria	Alphaproteobacteria	Sphingomonadales	Sphingomonadaceae	Sphingomonas	ASV1364	14-28	4.5365e-05
51.0357	8.37257	1.93719	4.32202	1.54605e-05	0.000106477	Bacteria	Bacteroidetes	Bacteroidia	Chitinophagales	Chitinophagaceae	Taibaiella	ASV289	14-28	0.000111982
28.5561	-18.1962	2.43379	-7.47649	7.63338e-14	1.63176e-12	Bacteria	Actinobacteria	Actinobacteria	Micrococcales	Demequinaceae	unclassified	ASV399	14-28	2.1206e-12
1.65348	25.9695	4.63509	5.6028	2.10919e-08	1.97257e-07	Bacteria	Verrucomicrobia	Verrucomicrobiae	Chthoniobacterales	Terrimicrobiaceae	Terrimicrobium	ASV1583	14-28	2.12338e-07
4.59725	29.6792	4.63475	6.40364	1.5172e-10	1.90634e-09	Bacteria	Proteobacteria	Gammaproteobacteria	Betaproteobacteriales	Methylophilaceae	Methylotenera	ASV1033	14-28	2.49731e-09
20.001	7.17018	2.10734	3.40247	0.000667797	0.00373876	Bacteria	Proteobacteria	Gammaproteobacteria	unclassified	unclassified	unclassified	ASV510	14-28	0.0036307
37.7933	5.45595	2.13562	2.55474	0.0106267	0.0498336	Bacteria	Bacteroidetes	Bacteroidia	Flavobacteriales	Flavobacteriaceae	Flavobacterium	ASV385	14-28	0.0471762
3.5707	-35.023	4.59846	-7.61625	2.61153e-14	5.97024e-13	Bacteria	Proteobacteria	Alphaproteobacteria	Rhodobacterales	Rhodobacteraceae	unclassified	ASV1153	14-28	7.71045e-13
28.6842	7.07385	1.95134	3.62513	0.000288817	0.00171005	Bacteria	Firmicutes	Negativicutes	Selenomonadales	Veillonellaceae	Sporomusa	ASV460	14-28	0.00167835
0.931347	36.7142	4.64226	7.90868	2.6013e-15	7.01924e-14	Bacteria	Planctomycetes	Phycisphaerae	Tepidisphaerales	Tepidisphaeraceae	unclassified	ASV2060	14-28	9.06187e-14
29.1211	-12.7498	4.54371	-2.80603	0.00501557	0.0254019	Bacteria	Proteobacteria	Alphaproteobacteria	Rhizobiales	Rhizobiaceae	Allorhizobium-Neorhizobium-Pararhizobium-Rhizobium	ASV434	14-28	0.0237743
3.00669	28.7047	4.63455	6.19364	5.87889e-10	6.76689e-09	Bacteria	Bacteroidetes	Bacteroidia	Chitinophagales	Chitinophagaceae	unclassified	ASV1299	14-28	8.64734e-09
30.0853	5.63598	2.21242	2.54743	0.0108521	0.0507459	Bacteria	Proteobacteria	Alphaproteobacteria	Rhizobiales	Devosiaceae	Devosia	ASV285	14-28	0.0480176
16.7479	23.0139	4.61501	4.98674	6.14077e-07	5.00382e-06	Bacteria	Proteobacteria	Gammaproteobacteria	Betaproteobacteriales	Burkholderiaceae	unclassified	ASV439	14-28	5.25076e-06
5.87908	-22.0611	4.61634	-4.77891	1.76247e-06	1.32467e-05	Bacteria	Acidobacteria	Blastocatellia_(Subgroup_4)	Blastocatellales	Blastocatellaceae	unclassified	ASV987	14-28	1.43972e-05
2.75773	32.5318	4.61608	7.04748	1.82188e-12	2.91147e-11	Bacteria	Firmicutes	Clostridia	Clostridiales	Ruminococcaceae	Ruminococcaceae_NK4A214_group	ASV1446	14-28	3.94581e-11
0.928892	29.1761	4.61964	6.31567	2.68988e-10	3.30414e-09	Bacteria	Bacteroidetes	Bacteroidia	Chitinophagales	Chitinophagaceae	unclassified	ASV1968	14-28	4.21671e-09
19.7277	22.6351	4.59798	4.92283	8.53006e-07	6.78284e-06	Bacteria	Proteobacteria	Alphaproteobacteria	Caulobacterales	Caulobacteraceae	Asticcacaulis	ASV444	14-28	7.20948e-06
32.3056	6.99013	1.96008	3.56625	0.000362123	0.00211367	Bacteria	Proteobacteria	Alphaproteobacteria	Caulobacterales	Caulobacteraceae	Phenylobacterium	ASV291	14-28	0.00207866
5.32557	20.8116	4.63399	4.49108	7.08646e-06	5.04948e-05	Bacteria	Bacteroidetes	Bacteroidia	Cytophagales	Spirosomaceae	Leadbetterella	ASV923	14-28	5.36907e-05
49.4358	7.15566	1.68692	4.24186	2.21679e-05	0.000147726	Bacteria	Proteobacteria	Gammaproteobacteria	Pseudomonadales	Moraxellaceae	Acinetobacter	ASV294	14-28	0.000156435
7.85578	15.6463	4.63763	3.37377	0.00074147	0.00408967	Bacteria	Firmicutes	Bacilli	Lactobacillales	Leuconostocaceae	Leuconostoc	ASV612	14-28	0.00399823
1.31149	26.174	4.61814	5.66765	1.44767e-08	1.36946e-07	Bacteria	Bacteroidetes	Bacteroidia	Chitinophagales	Chitinophagaceae	Niabella	ASV1782	14-28	1.50332e-07
0.771101	28.1237	4.62258	6.08398	1.17235e-09	1.26124e-08	Bacteria	Bacteroidetes	Bacteroidia	Cytophagales	Spirosomaceae	unclassified	ASV2590	14-28	1.58496e-08
41.5653	16.3898	4.63563	3.53561	0.000406832	0.00234964	Bacteria	Proteobacteria	Alphaproteobacteria	Acetobacterales	Acetobacteraceae	Komagataeibacter	ASV162	14-28	0.00231311
50.0941	-9.82526	2.83531	-3.46532	0.000529592	0.00299556	Bacteria	Proteobacteria	Alphaproteobacteria	Rhizobiales	Rhizobiaceae	unclassified	ASV299	14-28	0.00293999
62.5063	6.29912	1.79325	3.51268	0.000443616	0.00253539	Bacteria	Bacteroidetes	Bacteroidia	Flavobacteriales	Flavobacteriaceae	Flavobacterium	ASV228	14-28	0.00250925
1343.15	5.54005	1.46149	3.79069	0.00015023	0.000919249	Bacteria	Bacteroidetes	Bacteroidia	Bacteroidales	Bacteroidaceae	Bacteroides	ASV16	14-28	0.000911624
2.75975	37.7644	4.60103	8.20782	2.25245e-16	7.41508e-15	Bacteria	Proteobacteria	Deltaproteobacteria	Bdellovibrionales	Bacteriovoracaceae	Bacteriovorax	ASV1384	14-28	9.50652e-15
2.43975	43.0464	4.57875	9.40133	5.38755e-21	3.28441e-19	Bacteria	Proteobacteria	Alphaproteobacteria	Rhizobiales	Devosiaceae	Devosia	ASV1381	14-28	4.0772e-19
6.97861	-17.5531	4.4321	-3.96044	7.48109e-05	0.000469995	Bacteria	Actinobacteria	Thermoleophilia	Gaiellales	Gaiellaceae	Gaiella	ASV729	14-28	0.000483846
2.24177	28.4064	4.63469	6.12909	8.83836e-10	9.82969e-09	Bacteria	Proteobacteria	Alphaproteobacteria	Rhizobiales	Devosiaceae	unclassified	ASV1318	14-28	1.24341e-08
48.9454	4.74211	1.17448	4.03763	5.39933e-05	0.000344469	Bacteria	Proteobacteria	Alphaproteobacteria	Sphingomonadales	Sphingomonadaceae	Sphingomonas	ASV301	14-28	0.00035981
10.8181	16.921	4.62649	3.65741	0.000254774	0.00151393	Bacteria	Proteobacteria	Alphaproteobacteria	Rhizobiales	Xanthobacteraceae	unclassified	ASV662	14-28	0.00149371
415.732	3.96214	0.814889	4.86219	1.16097e-06	8.92967e-06	Bacteria	Bacteroidetes	Bacteroidia	Chitinophagales	Chitinophagaceae	Chitinophaga	ASV50	14-28	9.67569e-06
353.59	3.13449	0.660933	4.74252	2.11079e-06	1.57211e-05	Bacteria	Proteobacteria	Gammaproteobacteria	Betaproteobacteriales	Burkholderiaceae	Achromobacter	ASV47	14-28	1.7094e-05
10.0808	35.6188	3.90099	9.13072	6.80459e-20	3.39405e-18	Bacteria	Bacteroidetes	Bacteroidia	Chitinophagales	Chitinophagaceae	unclassified	ASV706	14-28	4.52539e-18
17.594	36.3909	4.56311	7.97503	1.52346e-15	4.25021e-14	Bacteria	Bacteroidetes	Bacteroidia	Chitinophagales	Chitinophagaceae	unclassified	ASV576	14-28	5.46185e-14
6.37729	-39.9819	4.35324	-9.18441	4.13785e-20	2.19706e-18	Bacteria	Proteobacteria	Alphaproteobacteria	Rhodobacterales	Rhodobacteraceae	unclassified	ASV902	14-28	2.80862e-18
124.366	8.1186	1.3121	6.1875	6.11264e-10	6.93891e-09	Bacteria	Proteobacteria	Alphaproteobacteria	Sphingomonadales	Sphingomonadaceae	Sphingopyxis	ASV137	14-28	8.9039e-09
1.01664	25.2336	4.62213	5.45929	4.78041e-08	4.25328e-07	Bacteria	Proteobacteria	Gammaproteobacteria	Betaproteobacteriales	Burkholderiaceae	Burkholderia-Caballeronia-Paraburkholderia	ASV1952	14-28	4.5483e-07
3.08368	16.4581	4.63714	3.54919	0.000386414	0.00224748	Bacteria	Proteobacteria	Alphaproteobacteria	Reyranellales	Reyranellaceae	Reyranella	ASV1223	14-28	0.00220846
3.45448	32.8207	3.38384	9.69927	3.03676e-22	2.08271e-20	Bacteria	Proteobacteria	Alphaproteobacteria	Rhizobiales	Rhizobiaceae	unclassified	ASV1184	14-28	2.56333e-20
16.9079	42.957	4.56323	9.41373	4.78837e-21	3.0314e-19	Bacteria	Bacteroidetes	Bacteroidia	Sphingobacteriales	Sphingobacteriaceae	Mucilaginibacter	ASV587	14-28	3.66588e-19
0.467555	25.4148	4.62382	5.49649	3.87418e-08	3.52315e-07	Bacteria	Firmicutes	Bacilli	Bacillales	Paenibacillaceae	Paenibacillus	ASV2703	14-28	3.74012e-07
2.06412	22.09	4.62821	4.7729	1.81596e-06	1.35867e-05	Bacteria	Bacteroidetes	Bacteroidia	Cytophagales	Cyclobacteriaceae	Algoriphagus	ASV1391	14-28	1.47974e-05
5.0339	19.6745	4.63584	4.24399	2.19583e-05	0.000146925	Bacteria	Proteobacteria	Alphaproteobacteria	Rhizobiales	Xanthobacteraceae	unclassified	ASV664	14-28	0.000155122
3.24	17.2891	3.77183	4.58374	4.56732e-06	3.34125e-05	Bacteria	Proteobacteria	Alphaproteobacteria	Sphingomonadales	Sphingomonadaceae	Sphingobium	ASV1058	14-28	3.55872e-05
22.2735	-20.5365	4.63567	-4.43011	9.41837e-06	6.62506e-05	Bacteria	Proteobacteria	Alphaproteobacteria	Caulobacterales	Caulobacteraceae	Caulobacter	ASV486	14-28	7.03067e-05
5.59664	31.8843	4.61574	6.90774	4.92449e-12	7.43643e-11	Bacteria	Firmicutes	Bacilli	Bacillales	Paenibacillaceae	Paenibacillus	ASV872	14-28	1.01321e-10
122.665	5.21797	1.59947	3.26231	0.00110507	0.00602301	Bacteria	Proteobacteria	Alphaproteobacteria	Caulobacterales	Caulobacteraceae	Asticcacaulis	ASV147	14-28	0.00578362
45.4774	8.8223	1.79651	4.91081	9.07019e-07	7.14332e-06	Bacteria	Proteobacteria	Gammaproteobacteria	Pseudomonadales	Pseudomonadaceae	Pseudomonas	ASV317	14-28	7.63659e-06
3.98201	28.9814	4.63545	6.25212	4.0492e-10	4.79495e-09	Bacteria	Proteobacteria	Gammaproteobacteria	Betaproteobacteriales	Burkholderiaceae	Hydrogenophaga	ASV1126	14-28	6.12872e-09
30.996	19.9369	3.3444	5.96128	2.50271e-09	2.64068e-08	Bacteria	Proteobacteria	Alphaproteobacteria	Rhizobiales	Beijerinckiaceae	Bosea	ASV281	14-28	3.07997e-08
33.7558	9.07499	1.89324	4.79335	1.64016e-06	1.2384e-05	Bacteria	Verrucomicrobia	Verrucomicrobiae	Verrucomicrobiales	Rubritaleaceae	Luteolibacter	ASV363	14-28	1.34481e-05
3.44066	30.0221	4.61665	6.50301	7.87265e-11	1.03667e-09	Bacteria	Bacteroidetes	Bacteroidia	Flavobacteriales	Crocinitomicaceae	Fluviicola	ASV1176	14-28	1.3569e-09
18.7302	-37.6021	4.56287	-8.24089	1.70932e-16	5.74191e-15	Bacteria	Proteobacteria	Alphaproteobacteria	Rhizobiales	Rhizobiaceae	unclassified	ASV534	14-28	7.45307e-15
0.759323	28.341	4.61971	6.13481	8.52614e-10	9.54695e-09	Bacteria	Firmicutes	Clostridia	Clostridiales	Lachnospiraceae	unclassified	ASV2426	14-28	1.20464e-08
0.374192	25.1751	4.62793	5.43982	5.33335e-08	4.64481e-07	Bacteria	unclassified	unclassified	unclassified	unclassified	unclassified	ASV3091	14-28	5.03799e-07
26.3898	6.38199	1.87168	3.40977	0.00065018	0.00365254	Bacteria	Proteobacteria	Alphaproteobacteria	Sphingomonadales	Sphingomonadaceae	Sphingopyxis	ASV447	14-28	0.00355252
0.432554	-26.5956	4.62564	-5.74961	8.9448e-09	8.71192e-08	Bacteria	Chloroflexi	KD4-96	unclassified	unclassified	unclassified	ASV2710	14-28	9.75043e-08
321.001	10.7638	1.07367	10.0252	1.18075e-23	9.71757e-22	Bacteria	Actinobacteria	Actinobacteria	Micrococcales	Microbacteriaceae	Galbitalea	ASV70	14-28	1.11058e-21
2.31479	-26.0713	4.61871	-5.64472	1.65455e-08	1.55622e-07	Bacteria	Proteobacteria	Alphaproteobacteria	Rhizobiales	Devosiaceae	unclassified	ASV1374	14-28	1.70212e-07
15.733	-27.4173	4.63562	-5.91448	3.32925e-09	3.46832e-08	Bacteria	Bacteroidetes	Bacteroidia	Sphingobacteriales	Sphingobacteriaceae	Pedobacter	ASV555	14-28	4.00727e-08
5.90351	36.5443	4.31115	8.47671	2.31654e-17	8.66598e-16	Bacteria	Bacteroidetes	Bacteroidia	Cytophagales	Spirosomaceae	Dyadobacter	ASV983	14-28	1.12148e-15
57.7467	8.00339	3.07826	2.59997	0.00932307	0.0444805	Bacteria	Bacteroidetes	Bacteroidia	Flavobacteriales	Flavobacteriaceae	Flavobacterium	ASV298	14-28	0.0418997
10.4212	18.3855	3.35064	5.48716	4.08439e-08	3.67372e-07	Bacteria	Proteobacteria	Alphaproteobacteria	Sphingomonadales	Sphingomonadaceae	Sphingopyxis	ASV613	14-28	3.92579e-07
3.7768	-30.9233	4.60349	-6.71736	1.8504e-11	2.58115e-10	Bacteria	Bacteroidetes	Bacteroidia	Cytophagales	Cytophagaceae	Cytophaga	ASV1340	14-28	3.52111e-10
31.4069	40.9621	2.78938	14.685	8.04112e-49	2.64714e-46	Bacteria	Bacteroidetes	Bacteroidia	Sphingobacteriales	Sphingobacteriaceae	unclassified	ASV409	14-28	3.78163e-46
2.074	34.6077	4.58505	7.54795	4.42172e-14	9.70421e-13	Bacteria	Proteobacteria	Alphaproteobacteria	Rickettsiales	SM2D12	unclassified	ASV1492	14-28	1.26029e-12
54.0387	7.30293	1.34335	5.43634	5.4387e-08	4.71163e-07	Bacteria	Firmicutes	Clostridia	Clostridiales	Lachnospiraceae	unclassified	ASV309	14-28	5.13014e-07
380.242	2.68062	0.871382	3.07629	0.00209596	0.0110222	Bacteria	Proteobacteria	Gammaproteobacteria	Betaproteobacteriales	Burkholderiaceae	Variovorax	ASV58	14-28	0.0104623
291.245	9.44543	1.85533	5.09097	3.5624e-07	2.99169e-06	Bacteria	Bacteroidetes	Bacteroidia	Bacteroidales	Dysgonomonadaceae	Dysgonomonas	ASV81	14-28	3.12732e-06
3.46994	-23.0124	4.63504	-4.96487	6.87486e-07	5.52001e-06	Bacteria	Bacteroidetes	Bacteroidia	Flavobacteriales	Flavobacteriaceae	Flavobacterium	ASV1099	14-28	5.84807e-06
5.32952	36.8041	4.34898	8.4627	2.61251e-17	9.55599e-16	Bacteria	Bacteroidetes	Bacteroidia	Cytophagales	Spirosomaceae	Dyadobacter	ASV1027	14-28	1.25553e-15
1.40685	-27.2609	4.63532	-5.88111	4.07517e-09	4.16629e-08	Bacteria	Bacteroidetes	Bacteroidia	Sphingobacteriales	Sphingobacteriaceae	Mucilaginibacter	ASV1757	14-28	4.7657e-08
0.646296	34.2226	4.60433	7.43269	1.06412e-13	2.08517e-12	Bacteria	Firmicutes	Clostridia	Clostridiales	Peptococcaceae	Desulfosporosinus	ASV2511	14-28	2.81372e-12
5.12793	34.3589	4.61556	7.44415	9.75685e-14	1.98269e-12	Bacteria	Bacteroidetes	Bacteroidia	Bacteroidales	unclassified	unclassified	ASV849	14-28	2.61135e-12
580.97	-2.03357	0.785173	-2.58996	0.00959859	0.0456627	Bacteria	Proteobacteria	Gammaproteobacteria	Pseudomonadales	Pseudomonadaceae	Pseudomonas	ASV37	14-28	0.0429912
155.134	4.8845	1.15026	4.24643	2.17199e-05	0.000145922	Bacteria	Bacteroidetes	Bacteroidia	Chitinophagales	Chitinophagaceae	Taibaiella	ASV128	14-28	0.000153933
65.7708	39.0136	1.89248	20.6151	2.00955e-94	3.30773e-91	Bacteria	Proteobacteria	Alphaproteobacteria	Rhizobiales	Xanthobacteraceae	unclassified	ASV216	14-28	6.61545e-91
75.4142	4.50059	1.58752	2.83498	0.00458287	0.0233353	Bacteria	Bacteroidetes	Bacteroidia	Cytophagales	Spirosomaceae	unclassified	ASV193	14-28	0.0218808
32.2803	7.13581	2.03127	3.51298	0.000443107	0.00253539	Bacteria	Proteobacteria	Alphaproteobacteria	Rhizobiales	Beijerinckiaceae	Camelimonas	ASV227	14-28	0.00250852
31.2182	18.2074	2.46831	7.37645	1.62563e-13	3.04067e-12	Bacteria	Proteobacteria	Alphaproteobacteria	Sphingomonadales	Sphingomonadaceae	Sphingobium	ASV394	14-28	4.11661e-12
3.99973	35.0764	4.58101	7.6569	1.90471e-14	4.47878e-13	Bacteria	Bacteroidetes	Bacteroidia	Cytophagales	Spirosomaceae	Dyadobacter	ASV1102	14-28	5.77907e-13
3.22001	34.5622	4.30825	8.02234	1.03753e-15	2.9961e-14	Bacteria	Proteobacteria	Deltaproteobacteria	Oligoflexales	Oligoflexaceae	unclassified	ASV1260	14-28	3.81627e-14
5.26815	39.1125	4.5991	8.50438	1.8257e-17	6.98859e-16	Bacteria	Proteobacteria	Gammaproteobacteria	Betaproteobacteriales	Burkholderiaceae	unclassified	ASV928	14-28	9.10635e-16
2.71245	35.2892	4.59991	7.67172	1.69702e-14	4.04825e-13	Bacteria	Verrucomicrobia	Verrucomicrobiae	Opitutales	Opitutaceae	unclassified	ASV1300	14-28	5.17277e-13
39.4254	6.2682	1.53036	4.09589	4.20546e-05	0.000273604	Bacteria	Proteobacteria	Alphaproteobacteria	Sphingomonadales	Sphingomonadaceae	Sphingopyxis	ASV339	14-28	0.000283987
84.7384	9.60355	2.05757	4.66741	3.05014e-06	2.24131e-05	Bacteria	Proteobacteria	Gammaproteobacteria	Betaproteobacteriales	Burkholderiaceae	unclassified	ASV196	14-28	2.4342e-05
55.6026	9.09383	1.73415	5.24396	1.57162e-07	1.34036e-06	Bacteria	Bacteroidetes	Bacteroidia	Cytophagales	Spirosomaceae	Dyadobacter	ASV269	14-28	1.42137e-06
20.9517	31.053	4.6154	6.72813	1.71863e-11	2.41783e-10	Bacteria	Firmicutes	Clostridia	Clostridiales	Lachnospiraceae	Anaerocolumna	ASV599	14-28	3.28937e-10
18.0501	7.69815	2.46989	3.1168	0.00182825	0.00973883	Bacteria	Proteobacteria	Alphaproteobacteria	Sphingomonadales	Sphingomonadaceae	unclassified	ASV548	14-28	0.00924349
51.921	6.53075	1.88645	3.46192	0.000536345	0.00302337	Bacteria	Bacteroidetes	Bacteroidia	Chitinophagales	Chitinophagaceae	Filimonas	ASV282	14-28	0.00297247
68.3732	3.83207	1.36769	2.80185	0.00508097	0.0256542	Bacteria	Bacteroidetes	Bacteroidia	Cytophagales	Spirosomaceae	Dyadobacter	ASV221	14-28	0.0240497
4.6378	41.8762	4.19329	9.98647	1.74696e-23	1.30704e-21	Bacteria	Bacteroidetes	Bacteroidia	Cytophagales	Spirosomaceae	Dyadobacter	ASV1052	14-28	1.5975e-21
7.14767	34.534	4.61883	7.47679	7.61618e-14	1.63176e-12	Bacteria	Verrucomicrobia	Verrucomicrobiae	Chthoniobacterales	Chthoniobacteraceae	LD29	ASV824	14-28	2.1206e-12
22.6534	28.5203	2.48548	11.4748	1.76646e-30	2.42299e-28	Bacteria	Actinobacteria	Actinobacteria	Micrococcales	Cellulomonadaceae	Cellulomonas	ASV473	14-28	3.52435e-28
69.9939	8.4826	1.80032	4.71173	2.45629e-06	1.82119e-05	Bacteria	Verrucomicrobia	Verrucomicrobiae	Verrucomicrobiales	Rubritaleaceae	Luteolibacter	ASV213	14-28	1.97463e-05
108.617	10.2774	1.32463	7.75867	8.58277e-15	2.14049e-13	Bacteria	Verrucomicrobia	Verrucomicrobiae	Verrucomicrobiales	Rubritaleaceae	Luteolibacter	ASV159	14-28	2.78369e-13
30.1174	7.68949	1.70722	4.50411	6.66526e-06	4.79084e-05	Bacteria	Proteobacteria	Alphaproteobacteria	Sphingomonadales	Sphingomonadaceae	Sphingomonas	ASV423	14-28	5.07917e-05
6.73497	32.7388	4.52162	7.2405	4.47032e-13	7.82781e-12	Bacteria	Bacteroidetes	Bacteroidia	Chitinophagales	Chitinophagaceae	Chitinophaga	ASV834	14-28	1.06255e-11
35.9115	5.8056	1.58501	3.66281	0.000249464	0.00148774	Bacteria	Bacteroidetes	Bacteroidia	Chitinophagales	Chitinophagaceae	unclassified	ASV357	14-28	0.00146649
169.299	8.23756	1.1644	7.0745	1.49988e-12	2.44435e-11	Bacteria	Proteobacteria	Alphaproteobacteria	Rhizobiales	Devosiaceae	Devosia	ASV103	14-28	3.29173e-11
61.712	7.06447	2.19819	3.21377	0.00131005	0.00711662	Bacteria	Proteobacteria	Gammaproteobacteria	Betaproteobacteriales	Burkholderiaceae	unclassified	ASV256	14-28	0.00677561
18.6673	8.40196	2.22727	3.77231	0.000161741	0.000978769	Bacteria	Proteobacteria	Gammaproteobacteria	Pseudomonadales	Moraxellaceae	Acinetobacter	ASV551	14-28	0.000973401
342.306	2.2924	0.783908	2.92432	0.00345206	0.0178682	Bacteria	Actinobacteria	Actinobacteria	Micrococcales	Cellulomonadaceae	Cellulomonas	ASV62	14-28	0.0167985
70.459	4.38275	1.59535	2.74721	0.00601053	0.0295323	Bacteria	Bacteroidetes	Bacteroidia	Sphingobacteriales	env.OPS_17	unclassified	ASV206	14-28	0.0280463
3.33318	17.0233	4.25691	3.99898	6.36165e-05	0.000401199	Bacteria	Bacteroidetes	Bacteroidia	Sphingobacteriales	Sphingobacteriaceae	unclassified	ASV1064	14-28	0.000416767
42.1555	8.25234	2.01872	4.08791	4.35268e-05	0.000282067	Bacteria	Bacteroidetes	Bacteroidia	Flavobacteriales	Weeksellaceae	unclassified	ASV321	14-28	0.000293327
1.46695	31.6489	4.63115	6.83392	8.26263e-12	1.21431e-10	Bacteria	Bacteroidetes	Bacteroidia	Bacteroidales	Dysgonomonadaceae	Dysgonomonas	ASV1585	14-28	1.65353e-10
1.24787	29.2662	4.60869	6.35023	2.1499e-10	2.6607e-09	Bacteria	Firmicutes	Clostridia	Clostridiales	Lachnospiraceae	Anaerocolumna	ASV1957	14-28	3.42734e-09
4.53659	36.6874	4.58183	8.00717	1.17382e-15	3.33121e-14	Bacteria	Bacteroidetes	Bacteroidia	Chitinophagales	Chitinophagaceae	Taibaiella	ASV984	14-28	4.29356e-14
4.38555	20.6845	4.60118	4.49548	6.94127e-06	4.96754e-05	Bacteria	Firmicutes	Bacilli	Bacillales	unclassified	unclassified	ASV1076	14-28	5.2712e-05
12.0055	7.00412	2.54144	2.75597	0.00585184	0.0288387	Bacteria	Firmicutes	Bacilli	Bacillales	Paenibacillaceae	Paenibacillus	ASV685	14-28	0.027364
0.97822	25.1874	4.62207	5.44938	5.05449e-08	4.47295e-07	Bacteria	Proteobacteria	Alphaproteobacteria	Caulobacterales	Caulobacteraceae	Asticcacaulis	ASV1953	14-28	4.79521e-07
4.90269	31.1875	4.61645	6.75573	1.42121e-11	2.03418e-10	Bacteria	Bacteroidetes	Bacteroidia	Cytophagales	Spirosomaceae	Leadbetterella	ASV1049	14-28	2.77663e-10
0.840168	-15.6063	4.63495	-3.3671	0.00075962	0.00416778	Bacteria	Bacteroidetes	Bacteroidia	Chitinophagales	Chitinophagaceae	unclassified	ASV1748	14-28	0.00408273
257.799	-2.68559	1.03072	-2.60554	0.00917295	0.0438915	Bacteria	Proteobacteria	Gammaproteobacteria	Pseudomonadales	Pseudomonadaceae	Pseudomonas	ASV80	14-28	0.0412814
29.7933	8.29914	1.88929	4.39273	1.11937e-05	7.80711e-05	Bacteria	Bacteroidetes	Bacteroidia	Chitinophagales	Chitinophagaceae	Taibaiella	ASV430	14-28	8.2944e-05
39.0644	-12.5955	4.54355	-2.77217	0.00556839	0.0277745	Bacteria	Bacteroidetes	Bacteroidia	Sphingobacteriales	Sphingobacteriaceae	Mucilaginibacter	ASV344	14-28	0.02615
29.6943	7.53141	1.50029	5.01996	5.16826e-07	4.29644e-06	Bacteria	Verrucomicrobia	Verrucomicrobiae	Verrucomicrobiales	Rubritaleaceae	Luteolibacter	ASV421	14-28	4.45974e-06
30.4097	-7.22327	2.72265	-2.65303	0.00797725	0.0387332	Bacteria	Firmicutes	Bacilli	Bacillales	Paenibacillaceae	Paenibacillus	ASV414	14-28	0.0363979
0.896627	33.3153	4.60357	7.23684	4.59265e-13	7.95736e-12	Bacteria	Bacteroidetes	Bacteroidia	Cytophagales	Spirosomaceae	Fibrisoma	ASV2160	14-28	1.0877e-11
1.06744	30.0118	4.61894	6.49756	8.16353e-11	1.06644e-09	Bacteria	Actinobacteria	Actinobacteria	Micrococcales	Microbacteriaceae	Leifsonia	ASV1821	14-28	1.39607e-09
31.8996	6.78262	2.01071	3.37324	0.000742899	0.00408967	Bacteria	Bacteroidetes	Bacteroidia	Sphingobacteriales	Sphingobacteriaceae	Pedobacter	ASV397	14-28	0.00400266
57.9393	3.64311	1.18229	3.08139	0.00206035	0.0108697	Bacteria	Proteobacteria	Alphaproteobacteria	Rhizobiales	Beijerinckiaceae	Bosea	ASV262	14-28	0.0102924
3.34724	18.8533	4.6342	4.06831	4.73557e-05	0.000303297	Bacteria	Proteobacteria	Alphaproteobacteria	Rhizobiales	Rhizobiaceae	unclassified	ASV975	14-28	0.000317182
39.3589	-19.8728	4.63382	-4.28864	1.79772e-05	0.000122782	Bacteria	Proteobacteria	Alphaproteobacteria	Acetobacterales	Acetobacteraceae	Gluconobacter	ASV225	14-28	0.000129216
264.103	33.7214	3.16958	10.6391	1.96041e-26	1.89814e-24	Bacteria	Proteobacteria	Gammaproteobacteria	Pseudomonadales	Moraxellaceae	Acinetobacter	ASV77	14-28	2.39024e-24
184.842	1.73375	0.642954	2.69654	0.00700634	0.0342209	Bacteria	Bacteroidetes	Bacteroidia	Chitinophagales	Chitinophagaceae	unclassified	ASV102	14-28	0.032343
79.5467	5.90346	1.45083	4.06902	4.72111e-05	0.000303297	Bacteria	Proteobacteria	Gammaproteobacteria	Betaproteobacteriales	Burkholderiaceae	Xylophilus	ASV203	14-28	0.000316535
16.1617	-20.1178	3.28603	-6.12222	9.22823e-10	1.00594e-08	Bacteria	Bacteroidetes	Bacteroidia	Chitinophagales	Chitinophagaceae	unclassified	ASV561	14-28	1.2711e-08
29.3564	3.7864	1.38403	2.73578	0.00622326	0.0304865	Bacteria	Proteobacteria	Deltaproteobacteria	Bdellovibrionales	Bdellovibrionaceae	Bdellovibrio	ASV429	14-28	0.0289364
49.1704	6.25946	1.99208	3.14218	0.00167695	0.00907983	Bacteria	Bacteroidetes	Bacteroidia	Sphingobacteriales	Sphingobacteriaceae	unclassified	ASV302	14-28	0.00855897
66.1026	2.57273	0.985846	2.60967	0.00906298	0.0436189	Bacteria	Actinobacteria	Actinobacteria	Micrococcales	Rarobacteraceae	Rarobacter	ASV234	14-28	0.0408496
661.963	9.23423	1.04757	8.81488	1.19811e-18	5.32999e-17	Bacteria	Proteobacteria	Gammaproteobacteria	Xanthomonadales	Rhodanobacteraceae	Dokdonella	ASV31	14-28	6.91964e-17
82.5016	7.49763	2.25265	3.32837	0.000873563	0.00477702	Bacteria	Bacteroidetes	Bacteroidia	Flavobacteriales	Weeksellaceae	Chryseobacterium	ASV187	14-28	0.00465335
342.568	4.01896	0.913869	4.39774	1.09385e-05	7.66161e-05	Bacteria	Proteobacteria	Alphaproteobacteria	Rhizobiales	Rhizobiaceae	unclassified	ASV26	14-28	8.11941e-05
2.67068	19.3997	4.63516	4.18534	2.8474e-05	0.000188226	Bacteria	Actinobacteria	Actinobacteria	Propionibacteriales	Nocardioidaceae	Aeromicrobium	ASV891	14-28	0.00019734
40.4459	9.32254	1.85315	5.03063	4.88864e-07	4.08462e-06	Bacteria	Proteobacteria	Alphaproteobacteria	Rhodobacterales	Rhodobacteraceae	unclassified	ASV380	14-28	4.24069e-06
106.083	10.5301	2.54266	4.14137	3.45238e-05	0.000226399	Bacteria	Proteobacteria	Gammaproteobacteria	Pseudomonadales	Moraxellaceae	Acinetobacter	ASV169	14-28	0.000236284
5.47403	24.2596	4.58209	5.29444	1.19379e-07	1.02879e-06	Bacteria	Proteobacteria	Alphaproteobacteria	Rhizobiales	Devosiaceae	Paradevosia	ASV743	14-28	1.09776e-06
71.3585	8.18748	1.30571	6.27051	3.59875e-10	4.32376e-09	Bacteria	Proteobacteria	Alphaproteobacteria	Caulobacterales	Caulobacteraceae	unclassified	ASV198	14-28	5.49749e-09
9.86541	17.9426	4.5694	3.92668	8.61276e-05	0.000536992	Bacteria	Proteobacteria	Gammaproteobacteria	Xanthomonadales	Xanthomonadaceae	Stenotrophomonas	ASV553	14-28	0.000550547
2.19176	25.6122	4.63761	5.52272	3.33796e-08	3.06943e-07	Bacteria	Firmicutes	Erysipelotrichia	Erysipelotrichales	Erysipelotrichaceae	Erysipelothrix	ASV1348	14-28	3.2607e-07
693.407	-3.35886	0.715905	-4.69177	2.7085e-06	1.99919e-05	Bacteria	Bacteroidetes	Bacteroidia	Sphingobacteriales	Sphingobacteriaceae	unclassified	ASV30	14-28	2.17208e-05
67.4643	8.28176	1.69108	4.89732	9.71509e-07	7.61478e-06	Bacteria	Proteobacteria	Alphaproteobacteria	Rhizobiales	Rhizobiaceae	Allorhizobium-Neorhizobium-Pararhizobium-Rhizobium	ASV261	14-28	8.16911e-06
82.3623	8.93723	1.98364	4.50546	6.62293e-06	4.78129e-05	Bacteria	Proteobacteria	Gammaproteobacteria	Betaproteobacteriales	Burkholderiaceae	unclassified	ASV181	14-28	5.05277e-05
2.21095	26.6266	4.63614	5.74326	9.28702e-09	8.99202e-08	Bacteria	Proteobacteria	Deltaproteobacteria	Myxococcales	Myxococcaceae	Corallococcus	ASV1366	14-28	1.00901e-07
349.555	8.36662	1.242	6.73641	1.62347e-11	2.30365e-10	Bacteria	Bacteroidetes	Bacteroidia	Chitinophagales	Chitinophagaceae	Ferruginibacter	ASV64	14-28	3.11631e-10
132.855	10.8836	1.17319	9.27689	1.74492e-20	1.02577e-18	Bacteria	Bacteroidetes	Bacteroidia	Sphingobacteriales	Sphingobacteriaceae	unclassified	ASV140	14-28	1.27651e-18
832.951	-6.38109	1.88286	-3.38904	0.000701371	0.00388706	Bacteria	Cyanobacteria	Oxyphotobacteria	Chloroplast	unclassified	unclassified	ASV15	14-28	0.00379444
184.566	-2.35239	0.840379	-2.7992	0.0051229	0.0257868	Bacteria	Firmicutes	Bacilli	Lactobacillales	Leuconostocaceae	Oenococcus	ASV98	14-28	0.0242307
137.289	3.72391	1.0322	3.60775	0.000308865	0.00181569	Bacteria	Bacteroidetes	Bacteroidia	Sphingobacteriales	Sphingobacteriaceae	Pedobacter	ASV130	14-28	0.0017854
17.8702	8.36146	2.68209	3.11752	0.0018238	0.00973883	Bacteria	Bacteroidetes	Bacteroidia	Chitinophagales	Chitinophagaceae	Taibaiella	ASV568	14-28	0.00922974
80.7937	9.31031	1.50318	6.19374	5.87537e-10	6.76689e-09	Bacteria	FBP	unclassified	unclassified	unclassified	unclassified	ASV202	14-28	8.64734e-09
48.4318	-18.7279	3.74005	-5.00739	5.51745e-07	4.54086e-06	Bacteria	Proteobacteria	Alphaproteobacteria	Acetobacterales	Acetobacteraceae	Gluconobacter	ASV205	14-28	4.73623e-06
4.93835	33.7677	4.59817	7.34373	2.07728e-13	3.79912e-12	Bacteria	Bacteroidetes	Bacteroidia	Flavobacteriales	Weeksellaceae	unclassified	ASV882	14-28	5.16107e-12
919.883	2.14949	0.496055	4.33316	1.46983e-05	0.000101653	Bacteria	Proteobacteria	Gammaproteobacteria	Betaproteobacteriales	Burkholderiaceae	Achromobacter	ASV18	14-28	0.00010705
1.99642	23.2175	4.6348	5.00939	5.46039e-07	4.51649e-06	Bacteria	Proteobacteria	Gammaproteobacteria	Xanthomonadales	Rhodanobacteraceae	Luteibacter	ASV1450	14-28	4.69337e-06
827.294	7.90237	1.43462	5.50835	3.62217e-08	3.31228e-07	Bacteria	Bacteroidetes	Bacteroidia	Bacteroidales	Dysgonomonadaceae	Dysgonomonas	ASV28	14-28	3.51675e-07
362.403	2.14964	0.76903	2.79526	0.00518577	0.0260237	Bacteria	Proteobacteria	Alphaproteobacteria	Rhizobiales	Rhizobiaceae	unclassified	ASV29	14-28	0.0244929
55.4194	-4.8262	1.60453	-3.00786	0.00263092	0.0137476	Bacteria	Proteobacteria	Alphaproteobacteria	Acetobacterales	Acetobacteraceae	Komagataeibacter	ASV166	14-28	0.012985
12.4134	37.1663	4.61699	8.04991	8.28554e-16	2.47964e-14	Bacteria	Proteobacteria	Gammaproteobacteria	Enterobacteriales	Enterobacteriaceae	Kosakonia	ASV667	14-28	3.11726e-14
54.3032	38.166	1.93763	19.6973	2.27498e-86	1.8723e-83	Bacteria	Bacteroidetes	Bacteroidia	Flavobacteriales	Flavobacteriaceae	Flavobacterium	ASV259	14-28	4.99281e-83
2.22374	-18.602	4.63463	-4.01369	5.9778e-05	0.000378441	Bacteria	Firmicutes	Bacilli	Bacillales	Paenibacillaceae	Paenibacillus	ASV1041	14-28	0.000393578
154.648	7.53755	1.31047	5.7518	8.82958e-09	8.65088e-08	Bacteria	Bacteroidetes	Bacteroidia	Sphingobacteriales	Sphingobacteriaceae	Pedobacter	ASV115	14-28	9.6568e-08
13.1821	-26.885	3.45001	-7.79273	6.55748e-15	1.67848e-13	Bacteria	Actinobacteria	Actinobacteria	Micrococcales	Microbacteriaceae	unclassified	ASV643	14-28	2.15872e-13
6.06138	-30.3864	4.61645	-6.58219	4.6356e-11	6.25426e-10	Bacteria	Proteobacteria	Gammaproteobacteria	Betaproteobacteriales	Burkholderiaceae	unclassified	ASV940	14-28	8.40793e-10
53.4374	7.93594	1.5064	5.26813	1.37817e-07	1.18149e-06	Bacteria	Bacteroidetes	Bacteroidia	Flavobacteriales	Flavobacteriaceae	Flavobacterium	ASV287	14-28	1.2533e-06
48.1833	49.4151	4.50515	10.9686	5.41225e-28	5.93904e-26	Bacteria	Proteobacteria	Gammaproteobacteria	Betaproteobacteriales	Burkholderiaceae	unclassified	ASV326	14-28	7.74658e-26
9.25868	-13.8115	4.635	-2.97982	0.00288414	0.0150231	Bacteria	Proteobacteria	Gammaproteobacteria	Betaproteobacteriales	Burkholderiaceae	Lampropedia	ASV475	14-28	0.0141605
1.89711	27.9322	4.61774	6.04889	1.45844e-09	1.54877e-08	Bacteria	Proteobacteria	Alphaproteobacteria	Caulobacterales	Caulobacteraceae	Asticcacaulis	ASV1496	14-28	1.90902e-08
1.76679	-16.1405	4.63804	-3.48002	0.00050138	0.00285561	Bacteria	Chloroflexi	KD4-96	unclassified	unclassified	unclassified	ASV1343	14-28	0.0027928
0.3708	-23.0289	4.62805	-4.97595	6.49298e-07	5.26475e-06	Bacteria	Bacteroidetes	Bacteroidia	Chitinophagales	37-13	unclassified	ASV2908	14-28	5.53753e-06
1.24374	26.7054	4.61885	5.78183	7.38927e-09	7.37136e-08	Bacteria	Firmicutes	Clostridia	Clostridiales	Family_XIII	Anaerovorax	ASV1857	14-28	8.20421e-08
59.1716	9.20079	1.41995	6.47967	9.19258e-11	1.17294e-09	Bacteria	Bacteroidetes	Bacteroidia	Cytophagales	Spirosomaceae	unclassified	ASV270	14-28	1.54793e-09
444.093	9.03708	1.28166	7.05108	1.7754e-12	2.865e-11	Bacteria	Proteobacteria	Gammaproteobacteria	Betaproteobacteriales	Burkholderiaceae	unclassified	ASV49	14-28	3.85783e-11
11.2613	7.06543	2.66875	2.64747	0.0081096	0.0391449	Bacteria	BRC1	unclassified	unclassified	unclassified	unclassified	ASV709	14-28	0.0369506
120.442	8.7051	2.51114	3.4666	0.000527089	0.00299169	Bacteria	Proteobacteria	Gammaproteobacteria	Betaproteobacteriales	Burkholderiaceae	unclassified	ASV145	14-28	0.00292857
0.557405	26.8659	4.62346	5.81078	6.2182e-09	6.24095e-08	Bacteria	Firmicutes	Clostridia	Clostridiales	Ruminococcaceae	Ruminococcaceae_UCG-013	ASV2625	14-28	7.03447e-08
128.872	4.26905	0.783993	5.44527	5.17277e-08	4.52893e-07	Bacteria	Actinobacteria	Actinobacteria	Micrococcales	Microbacteriaceae	unclassified	ASV129	14-28	4.89332e-07
136.109	4.50226	0.905084	4.97441	6.54452e-07	5.28053e-06	Bacteria	Bacteroidetes	Bacteroidia	Cytophagales	Spirosomaceae	Dyadobacter	ASV135	14-28	5.57427e-06
4.60391	27.4251	4.63355	5.9188	3.243e-09	3.39999e-08	Bacteria	Bacteroidetes	Bacteroidia	Cytophagales	Cytophagaceae	Cytophaga	ASV1160	14-28	3.91778e-08
21.6895	45.4345	4.60787	9.86019	6.19295e-23	4.43199e-21	Bacteria	Bacteroidetes	Bacteroidia	Chitinophagales	Chitinophagaceae	unclassified	ASV503	14-28	5.43658e-21
3.12001	25.3112	4.63478	5.46115	4.73053e-08	4.23177e-07	Bacteria	Firmicutes	Bacilli	Bacillales	Paenibacillaceae	Paenibacillus	ASV1221	14-28	4.50735e-07
23.4399	11.2301	4.05265	2.77104	0.00558774	0.0277867	Bacteria	Bacteroidetes	Bacteroidia	Chitinophagales	Chitinophagaceae	Taibaiella	ASV497	14-28	0.0262221
66.9458	6.40953	1.33466	4.80238	1.56791e-06	1.1893e-05	Bacteria	Proteobacteria	Alphaproteobacteria	Caulobacterales	Caulobacteraceae	Brevundimonas	ASV257	14-28	1.28717e-05
237.376	10.9861	1.09971	9.99005	1.68499e-23	1.30704e-21	Bacteria	Proteobacteria	Deltaproteobacteria	Oligoflexales	Oligoflexaceae	Oligoflexus	ASV86	14-28	1.56253e-21
124.838	9.29262	1.43252	6.48691	8.76127e-11	1.12664e-09	Bacteria	Bacteroidetes	Bacteroidia	Chitinophagales	Chitinophagaceae	unclassified	ASV150	14-28	1.47908e-09
6.97315	27.9466	3.51617	7.94804	1.89485e-15	5.19821e-14	Bacteria	Bacteroidetes	Bacteroidia	Cytophagales	Spirosomaceae	unclassified	ASV814	14-28	6.70737e-14
20.2293	18.8439	4.61592	4.08237	4.45791e-05	0.000287754	Bacteria	Proteobacteria	Alphaproteobacteria	Rhizobiales	Beijerinckiaceae	Bosea	ASV313	14-28	0.000299194
17.5743	26.4728	4.49663	5.88725	3.92682e-09	4.03972e-08	Bacteria	Proteobacteria	Deltaproteobacteria	Bdellovibrionales	Bdellovibrionaceae	Bdellovibrio	ASV517	14-28	4.61682e-08
37.0703	4.85353	1.8872	2.57182	0.0101165	0.0477128	Bacteria	Bacteroidetes	Bacteroidia	Chitinophagales	Chitinophagaceae	Filimonas	ASV353	14-28	0.0451267
53.6706	5.40779	1.7388	3.11007	0.0018704	0.00993123	Bacteria	Bacteroidetes	Bacteroidia	Chitinophagales	Chitinophagaceae	unclassified	ASV274	14-28	0.00943657
212.261	2.23399	0.524739	4.25734	2.0687e-05	0.000139553	Bacteria	Proteobacteria	Alphaproteobacteria	Caulobacterales	Caulobacteraceae	Brevundimonas	ASV96	14-28	0.000147247
38.0323	7.4243	2.09803	3.5387	0.000402099	0.00233048	Bacteria	Bacteroidetes	Bacteroidia	Cytophagales	Cytophagaceae	Cytophaga	ASV355	14-28	0.00229412
1.10253	28.0508	4.6195	6.07227	1.26116e-09	1.34796e-08	Bacteria	Proteobacteria	Alphaproteobacteria	unclassified	unclassified	unclassified	ASV2163	14-28	1.68427e-08
6.13364	31.9542	4.61571	6.92292	4.42428e-12	6.77008e-11	Bacteria	Proteobacteria	Alphaproteobacteria	Rhizobiales	Beijerinckiaceae	Bosea	ASV919	14-28	9.21818e-11
13.3527	31.1941	3.52675	8.84499	9.15366e-19	4.18526e-17	Bacteria	Proteobacteria	Gammaproteobacteria	Xanthomonadales	Xanthomonadaceae	Pseudoxanthomonas	ASV602	14-28	5.42952e-17
39.8641	7.36408	1.61258	4.56663	4.95619e-06	3.60969e-05	Bacteria	Proteobacteria	Alphaproteobacteria	Caulobacterales	Caulobacteraceae	Brevundimonas	ASV348	14-28	3.84806e-05
18.8157	19.407	2.82837	6.86153	6.81255e-12	1.01022e-10	Bacteria	Proteobacteria	Alphaproteobacteria	Rhizobiales	Rhizobiaceae	Allorhizobium-Neorhizobium-Pararhizobium-Rhizobium	ASV504	14-28	1.37168e-10
21.2267	35.6254	2.69718	13.2084	7.84817e-40	2.15301e-37	Bacteria	Proteobacteria	Gammaproteobacteria	Xanthomonadales	Xanthomonadaceae	unclassified	ASV528	14-28	2.58362e-37
25.7573	5.45673	2.11982	2.57415	0.0100487	0.047529	Bacteria	Proteobacteria	Gammaproteobacteria	Pseudomonadales	Moraxellaceae	Acinetobacter	ASV445	14-28	0.0448849
3.17381	-34.2949	4.59876	-7.45743	8.82238e-14	1.81521e-12	Bacteria	Proteobacteria	Alphaproteobacteria	Rhizobiales	Rhizobiaceae	unclassified	ASV1218	14-28	2.40027e-12
21.7001	39.3983	4.6162	8.53481	1.40392e-17	5.50203e-16	Bacteria	Proteobacteria	Gammaproteobacteria	Betaproteobacteriales	Burkholderiaceae	unclassified	ASV484	14-28	7.11031e-16
51.4259	10.0959	1.75434	5.75481	8.67397e-09	8.54932e-08	Bacteria	Bacteroidetes	Bacteroidia	Cytophagales	Spirosomaceae	Dyadobacter	ASV304	14-28	9.51824e-08
1.08848	26.2897	4.6184	5.69239	1.25276e-08	1.19886e-07	Bacteria	Proteobacteria	Alphaproteobacteria	Rhizobiales	Stappiaceae	Agaricicola	ASV1730	14-28	1.32394e-07
8.73289	22.5713	4.61567	4.89014	1.00763e-06	7.86047e-06	Bacteria	Firmicutes	Clostridia	Clostridiales	Lachnospiraceae	Anaerocolumna	ASV774	14-28	8.4405e-06
3.24057	-29.0188	4.6172	-6.28493	3.27998e-10	4.65417e-09	Bacteria	Proteobacteria	Gammaproteobacteria	Xanthomonadales	Xanthomonadaceae	Pseudoxanthomonas	ASV1177	28-42	5.09325e-09
5.17788	26.3359	4.42271	5.9547	2.60555e-09	2.85916e-08	Bacteria	Proteobacteria	Alphaproteobacteria	Rhizobiales	A0839	unclassified	ASV939	28-42	3.18866e-08
2.28249	33.0466	4.61631	7.15866	8.14689e-13	2.06304e-11	Bacteria	Verrucomicrobia	Verrucomicrobiae	Verrucomicrobiales	Rubritaleaceae	Luteolibacter	ASV1327	28-42	1.85602e-11
39.1384	9.16577	3.13841	2.92052	0.00349449	0.0160221	Bacteria	Proteobacteria	Gammaproteobacteria	Betaproteobacteriales	Burkholderiaceae	unclassified	ASV342	28-42	0.0169924
0.920445	-18.8541	4.61772	-4.08298	4.44613e-05	0.000268781	Bacteria	Proteobacteria	Alphaproteobacteria	Sphingomonadales	Sphingomonadaceae	unclassified	ASV1648	28-42	0.000299012
0.435874	-26.0726	4.62292	-5.63986	1.70188e-08	1.52245e-07	Bacteria	Proteobacteria	Gammaproteobacteria	unclassified	unclassified	unclassified	ASV3100	28-42	1.74536e-07
1.87242	-16.9482	4.63534	-3.65631	0.000255875	0.00138279	Bacteria	Actinobacteria	Actinobacteria	Micrococcales	Microbacteriaceae	Leucobacter	ASV1156	28-42	0.00149616
2.60606	31.2351	4.36914	7.14902	8.74008e-13	2.17972e-11	Bacteria	Proteobacteria	Alphaproteobacteria	Sphingomonadales	Sphingomonadaceae	Sphingomonas	ASV1296	28-42	1.97071e-11
11.2386	-6.58966	2.59494	-2.53942	0.0111036	0.0461527	Bacteria	Bacteroidetes	Bacteroidia	Sphingobacteriales	Sphingobacteriaceae	Sphingobacterium	ASV713	28-42	0.0489658
1.05723	17.6858	4.62003	3.82807	0.00012915	0.000723065	Bacteria	Planctomycetes	Phycisphaerae	Phycisphaerales	Phycisphaeraceae	unclassified	ASV1809	28-42	0.000795308
4.7738	-29.6543	4.63463	-6.3984	1.5701e-10	2.41532e-09	Bacteria	Bacteroidetes	Bacteroidia	Chitinophagales	Chitinophagaceae	unclassified	ASV970	28-42	2.57153e-09
1.84216	26.1092	4.63652	5.6312	1.78959e-08	1.59225e-07	Bacteria	Planctomycetes	Planctomycetacia	Planctomycetales	Rubinisphaeraceae	Planctomicrobium	ASV1424	28-42	1.82677e-07
36.9386	5.72733	1.98365	2.88726	0.00388612	0.017719	Bacteria	Bacteroidetes	Bacteroidia	Chitinophagales	Chitinophagaceae	unclassified	ASV345	28-42	0.0187995
20.8807	27.9617	4.634	6.03402	1.59935e-09	1.8939e-08	Bacteria	Proteobacteria	Gammaproteobacteria	Betaproteobacteriales	Burkholderiaceae	Rhodoferax	ASV485	28-42	2.08517e-08
3.4188	-30.1931	4.61696	-6.5396	6.16816e-11	1.0917e-09	Bacteria	Bacteroidetes	Bacteroidia	Chitinophagales	Chitinophagaceae	unclassified	ASV1093	28-42	1.0917e-09
2.28728	34.8454	4.58306	7.60307	2.89176e-14	1.05774e-12	Bacteria	Bacteroidetes	Bacteroidia	Chitinophagales	Chitinophagaceae	Niabella	ASV1369	28-42	8.42449e-13
2521.17	-2.7398	0.753757	-3.63486	0.00027813	0.00149121	Bacteria	Proteobacteria	Gammaproteobacteria	Betaproteobacteriales	Burkholderiaceae	unclassified	ASV4	28-42	0.00162054
25.9436	7.2589	1.98596	3.65511	0.000257068	0.00138279	Bacteria	Actinobacteria	Acidimicrobiia	Microtrichales	Microtrichaceae	IMCC26207	ASV431	28-42	0.00150047
80.4341	9.64781	1.63596	5.89735	3.69386e-09	3.94811e-08	Bacteria	Proteobacteria	Alphaproteobacteria	Caulobacterales	Hyphomonadaceae	Hirschia	ASV183	28-42	4.38205e-08
3.35069	34.3574	4.49299	7.64688	2.05908e-14	7.88195e-13	Bacteria	Proteobacteria	unclassified	unclassified	unclassified	unclassified	ASV1151	28-42	6.16225e-13
2.44141	34.4888	4.59842	7.50014	6.37474e-14	2.14139e-12	Bacteria	Bacteroidetes	Bacteroidia	Chitinophagales	unclassified	unclassified	ASV1289	28-42	1.80911e-12
666.591	-2.50649	0.82031	-3.05554	0.00224657	0.0105147	Bacteria	Proteobacteria	Gammaproteobacteria	Betaproteobacteriales	Burkholderiaceae	unclassified	ASV33	28-42	0.0111802
225.567	4.71412	1.65301	2.85184	0.00434672	0.019337	Bacteria	Bacteroidetes	Bacteroidia	Cytophagales	Spirosomaceae	Dyadobacter	ASV85	28-42	0.020844
151.128	4.50004	1.64211	2.74041	0.00613627	0.0264853	Bacteria	Bacteroidetes	Bacteroidia	Sphingobacteriales	Sphingobacteriaceae	unclassified	ASV109	28-42	0.0285925
266.041	-1.89257	0.560288	-3.37786	0.000730528	0.00368849	Bacteria	Proteobacteria	Deltaproteobacteria	Oligoflexales	Oligoflexaceae	Oligoflexus	ASV78	28-42	0.00394245
4578.44	-2.95471	0.736626	-4.01114	6.0427e-05	0.00035778	Bacteria	Bacteroidetes	Bacteroidia	Chitinophagales	unclassified	unclassified	ASV1	28-42	0.000397057
114.999	-7.04133	1.7095	-4.11895	3.80602e-05	0.000233758	Bacteria	Proteobacteria	Gammaproteobacteria	Enterobacteriales	Enterobacteriaceae	unclassified	ASV111	28-42	0.00025914
691.27	-4.95779	1.39619	-3.55094	0.000383863	0.00202512	Bacteria	Proteobacteria	Alphaproteobacteria	Acetobacterales	Acetobacteraceae	Acetobacter	ASV9	28-42	0.00219579
3.56072	30.4375	4.63423	6.56797	5.10062e-11	9.54048e-10	Bacteria	Verrucomicrobia	Verrucomicrobiae	Chthoniobacterales	Chthoniobacteraceae	LD29	ASV1142	28-42	9.20068e-10
1095.5	-2.77152	1.00632	-2.75411	0.00588522	0.0255595	Bacteria	Bacteroidetes	Bacteroidia	Chitinophagales	unclassified	unclassified	ASV17	28-42	0.0275005
21.8672	8.5216	2.58649	3.29465	0.00098543	0.00487092	Bacteria	Proteobacteria	Gammaproteobacteria	Xanthomonadales	Rhodanobacteraceae	Dokdonella	ASV440	28-42	0.00521378
0.798392	31.0145	4.60312	6.73771	1.60904e-11	3.26973e-10	Bacteria	Proteobacteria	Gammaproteobacteria	Betaproteobacteriales	Burkholderiaceae	unclassified	ASV2023	28-42	3.09763e-10
450.518	-2.31123	0.664133	-3.48008	0.000501264	0.00258171	Bacteria	Proteobacteria	Alphaproteobacteria	Rhodobacterales	Rhodobacteraceae	unclassified	ASV48	28-42	0.0027928
0.557039	25.6507	4.63762	5.53101	3.18395e-08	2.64686e-07	Bacteria	Proteobacteria	Alphaproteobacteria	Paracaedibacterales	Paracaedibacteraceae	unclassified	ASV2339	28-42	3.11488e-07
1.7909	29.8388	4.59968	6.48714	8.74793e-11	1.42565e-09	Bacteria	Proteobacteria	Gammaproteobacteria	unclassified	unclassified	unclassified	ASV1482	28-42	1.47908e-09
4.01861	-26.9438	4.52258	-5.95762	2.55932e-09	2.84638e-08	Bacteria	Proteobacteria	Alphaproteobacteria	Sphingomonadales	Sphingomonadaceae	Sphingobium	ASV1115	28-42	3.14376e-08
2.69865	16.2534	4.6264	3.51319	0.000442756	0.00230626	Bacteria	Actinobacteria	Actinobacteria	Micrococcales	Microbacteriaceae	unclassified	ASV1244	28-42	0.00250852
11.2423	-35.9059	4.59749	-7.8099	5.72353e-15	2.5462e-13	Bacteria	Proteobacteria	Alphaproteobacteria	Rhizobiales	Kaistiaceae	Kaistia	ASV686	28-42	1.89365e-13
19.6885	7.22051	2.55472	2.82634	0.00470836	0.0207218	Bacteria	Actinobacteria	Acidimicrobiia	Microtrichales	Microtrichaceae	unclassified	ASV512	28-42	0.0223987
12.4903	-20.3041	3.32946	-6.0983	1.07201e-09	1.32671e-08	Bacteria	Proteobacteria	Gammaproteobacteria	Enterobacteriales	Enterobacteriaceae	unclassified	ASV617	28-42	1.4613e-08
61.4525	-9.31738	1.42096	-6.55712	5.48569e-11	1.00327e-09	Bacteria	Firmicutes	Clostridia	Clostridiales	Clostridiaceae_1	Clostridium_sensu_stricto_3	ASV277	28-42	9.78802e-10
3.98408	25.085	4.61572	5.43469	5.48912e-08	4.40736e-07	Bacteria	Proteobacteria	Alphaproteobacteria	Rhizobiales	Xanthobacteraceae	Tardiphaga	ASV961	28-42	5.17029e-07
7.0195	-12.7449	4.12129	-3.09245	0.00198512	0.00936251	Bacteria	Proteobacteria	Gammaproteobacteria	Betaproteobacteriales	Burkholderiaceae	unclassified	ASV899	28-42	0.00996194
2.96262	-26.8145	4.63456	-5.78576	7.21831e-09	7.20081e-08	Bacteria	Bacteroidetes	Bacteroidia	unclassified	unclassified	unclassified	ASV1301	28-42	8.05514e-08
10.6988	28.6931	4.63506	6.19044	5.99948e-10	8.02857e-09	Bacteria	Actinobacteria	Actinobacteria	Micrococcales	Microbacteriaceae	Curtobacterium	ASV725	28-42	8.79746e-09
10.009	24.0193	4.0222	5.97168	2.3483e-09	2.62945e-08	Bacteria	Proteobacteria	Alphaproteobacteria	Caulobacterales	Caulobacteraceae	Caulobacter	ASV703	28-42	2.90624e-08
4.02651	-32.9792	4.61569	-7.14501	8.99912e-13	2.21083e-11	Bacteria	Bacteroidetes	Bacteroidia	Bacteroidales	Dysgonomonadaceae	Dysgonomonas	ASV1040	28-42	2.02219e-11
0.659536	27.5185	4.62077	5.95541	2.59427e-09	2.85916e-08	Bacteria	Bacteroidetes	Bacteroidia	Chitinophagales	Chitinophagaceae	unclassified	ASV2193	28-42	3.18076e-08
31.1279	6.93804	1.88361	3.68338	0.000230163	0.00125447	Bacteria	Proteobacteria	Alphaproteobacteria	Caulobacterales	Hyphomonadaceae	Hirschia	ASV389	28-42	0.00136032
2.0952	-26.9511	4.63574	-5.81376	6.10851e-09	6.20655e-08	Bacteria	Proteobacteria	Gammaproteobacteria	Betaproteobacteriales	Burkholderiaceae	Janthinobacterium	ASV1464	28-42	6.92228e-08
4.21426	-31.1353	4.61634	-6.74459	1.53456e-11	3.19733e-10	Bacteria	Bacteroidetes	Bacteroidia	Chitinophagales	Chitinophagaceae	Filimonas	ASV1137	28-42	2.9804e-10
1085.92	-2.61673	0.570483	-4.58686	4.49966e-06	3.15168e-05	Bacteria	Proteobacteria	Gammaproteobacteria	Pseudomonadales	Pseudomonadaceae	Pseudomonas	ASV10	28-42	3.51433e-05
5.66779	29.744	4.63447	6.418	1.38079e-10	2.16455e-09	Bacteria	Proteobacteria	Alphaproteobacteria	Reyranellales	Reyranellaceae	Reyranella	ASV912	28-42	2.2842e-09
0.778875	25.4738	4.6209	5.51273	3.5331e-08	2.92235e-07	Bacteria	Actinobacteria	Actinobacteria	Micrococcales	Microbacteriaceae	unclassified	ASV2071	28-42	3.44621e-07
0.49372	-25.9502	4.62536	-5.61043	2.01827e-08	1.78606e-07	Bacteria	Proteobacteria	Alphaproteobacteria	Rhizobiales	Beijerinckiaceae	unclassified	ASV2591	28-42	2.04436e-07
0.801137	31.8099	4.62644	6.87567	6.16992e-12	1.35409e-10	Bacteria	Proteobacteria	Alphaproteobacteria	Azospirillales	Azospirillaceae	Azospirillum	ASV2065	28-42	1.25379e-10
50.5102	5.55833	1.27362	4.36419	1.27594e-05	8.33412e-05	Bacteria	Acidobacteria	Blastocatellia_(Subgroup_4)	Blastocatellales	Blastocatellaceae	Blastocatella	ASV290	28-42	9.34459e-05
19.9685	7.03405	2.75953	2.549	0.0108033	0.0451324	Bacteria	Bacteroidetes	Bacteroidia	Sphingobacteriales	Sphingobacteriaceae	Mucilaginibacter	ASV506	28-42	0.0478337
8.48729	31.2287	4.59694	6.79337	1.09543e-11	2.34167e-10	Bacteria	Firmicutes	Clostridia	Clostridiales	Peptostreptococcaceae	Romboutsia	ASV620	28-42	2.16587e-10
1.37277	27.9525	4.63519	6.03049	1.63465e-09	1.92188e-08	Bacteria	Proteobacteria	Alphaproteobacteria	Rhizobiales	Beijerinckiaceae	unclassified	ASV1624	28-42	2.1103e-08
0.628391	25.7263	4.62136	5.56682	2.59436e-08	2.22413e-07	Bacteria	Proteobacteria	Alphaproteobacteria	Rickettsiales	SM2D12	unclassified	ASV2437	28-42	2.57636e-07
0.876363	27.0759	4.63614	5.84017	5.21475e-09	5.43258e-08	Bacteria	Proteobacteria	Alphaproteobacteria	Rhodospirillales	unclassified	unclassified	ASV2022	28-42	6.01295e-08
1.39941	-27.901	4.60011	-6.0653	1.31711e-09	1.57099e-08	Bacteria	Proteobacteria	Alphaproteobacteria	Acetobacterales	Acetobacteraceae	Roseomonas	ASV1660	28-42	1.74485e-08
18.5042	-8.13751	2.82378	-2.88178	0.00395433	0.0179306	Bacteria	Bacteroidetes	Bacteroidia	Flavobacteriales	Weeksellaceae	Chryseobacterium	ASV547	28-42	0.0191015
4.76536	31.8481	4.63403	6.87266	6.30172e-12	1.36482e-10	Bacteria	Verrucomicrobia	Verrucomicrobiae	Opitutales	Opitutaceae	Lacunisphaera	ASV1000	28-42	1.27663e-10
1.71188	26.3461	4.63695	5.68176	1.33314e-08	1.23975e-07	Bacteria	Proteobacteria	Gammaproteobacteria	Legionellales	Legionellaceae	Legionella	ASV1537	28-42	1.40438e-07
15.0162	29.5534	4.63481	6.3764	1.813e-10	2.71291e-09	Bacteria	Bacteroidetes	Bacteroidia	Chitinophagales	Chitinophagaceae	unclassified	ASV603	28-42	2.92569e-09
1.52244	29.3083	4.61777	6.34684	2.19785e-10	3.20147e-09	Bacteria	Proteobacteria	Deltaproteobacteria	Bdellovibrionales	Bdellovibrionaceae	Bdellovibrio	ASV1630	28-42	3.47852e-09
10.3118	-31.9575	4.61569	-6.92367	4.40087e-12	9.92305e-11	Bacteria	Proteobacteria	Gammaproteobacteria	Betaproteobacteriales	Burkholderiaceae	unclassified	ASV788	28-42	9.19851e-11
3.14383	25.7324	4.63166	5.55576	2.764e-08	2.3544e-07	Bacteria	Proteobacteria	Gammaproteobacteria	Xanthomonadales	Xanthomonadaceae	Luteimonas	ASV1096	28-42	2.73657e-07
0.7861	-18.5249	4.61958	-4.01009	6.06967e-05	0.000358089	Bacteria	Firmicutes	Bacilli	Bacillales	Paenibacillaceae	Paenibacillus	ASV2159	28-42	0.000398432
1.34518	-26.5675	4.61834	-5.75261	8.7876e-09	8.50847e-08	Bacteria	Bacteroidetes	Bacteroidia	Flavobacteriales	Flavobacteriaceae	Flavobacterium	ASV1649	28-42	9.62689e-08
45.4469	9.27144	2.97783	3.11348	0.00184893	0.00877044	Bacteria	Proteobacteria	Gammaproteobacteria	Betaproteobacteriales	Burkholderiaceae	Hydrogenophaga	ASV310	28-42	0.0093354
76.9924	-7.66549	1.47568	-5.19455	2.05211e-07	1.58581e-06	Bacteria	Bacteroidetes	Bacteroidia	Flavobacteriales	Weeksellaceae	Chryseobacterium	ASV218	28-42	1.8483e-06
40.9856	-15.2158	4.63473	-3.283	0.00102709	0.00504652	Bacteria	Proteobacteria	Gammaproteobacteria	Xanthomonadales	Xanthomonadaceae	Stenotrophomonas	ASV173	28-42	0.00540555
158.072	-11.1961	1.29382	-8.65348	4.99513e-18	4.83646e-16	Bacteria	Bacteroidetes	Bacteroidia	Chitinophagales	Chitinophagaceae	Taibaiella	ASV121	28-42	2.71801e-16
65.1258	40.51	4.56235	8.87919	6.73498e-19	7.39052e-17	Bacteria	Proteobacteria	Gammaproteobacteria	Betaproteobacteriales	Burkholderiaceae	Curvibacter	ASV231	28-42	4.06817e-17
16.6417	-8.21474	2.57982	-3.18423	0.00145139	0.00698536	Bacteria	Actinobacteria	Actinobacteria	Micrococcales	Microbacteriaceae	unclassified	ASV629	28-42	0.00747729
0.969759	18.0599	4.61811	3.91068	9.2038e-05	0.000526023	Bacteria	Planctomycetes	Planctomycetacia	Planctomycetales	Rubinisphaeraceae	SH-PL14	ASV1790	28-42	0.000582111
3.20726	24.2822	4.37117	5.55507	2.77493e-08	2.3544e-07	Bacteria	Bacteroidetes	Bacteroidia	Chitinophagales	Chitinophagaceae	Chitinophaga	ASV1087	28-42	2.74327e-07
4.62699	21.11	4.61605	4.57318	4.80371e-06	3.33625e-05	Bacteria	Proteobacteria	Gammaproteobacteria	Xanthomonadales	Rhodanobacteraceae	Dokdonella	ASV989	28-42	3.73408e-05
1.17562	21.3134	4.63652	4.59685	4.28931e-06	3.01718e-05	Bacteria	Planctomycetes	Planctomycetacia	Pirellulales	Pirellulaceae	Pir4_lineage	ASV1881	28-42	3.362e-05
0.863974	18.7801	4.61792	4.0668	4.7664e-05	0.000286332	Bacteria	Proteobacteria	Alphaproteobacteria	Rhizobiales	Devosiaceae	unclassified	ASV1841	28-42	0.000318923
18.7877	30.8258	4.63438	6.65155	2.90031e-11	5.68323e-10	Bacteria	Proteobacteria	Gammaproteobacteria	Betaproteobacteriales	Burkholderiaceae	unclassified	ASV540	28-42	5.39425e-10
26.3498	20.5725	4.63567	4.43788	9.08498e-06	6.07881e-05	Bacteria	Verrucomicrobia	Verrucomicrobiae	Chthoniobacterales	Chthoniobacteraceae	Chthoniobacter	ASV433	28-42	6.80495e-05
5.2801	-26.1028	4.40891	-5.92045	3.21054e-09	3.47668e-08	Bacteria	Proteobacteria	Gammaproteobacteria	Betaproteobacteriales	Burkholderiaceae	Variovorax	ASV988	28-42	3.8857e-08
12.2871	-43.4859	4.59954	-9.4544	3.24871e-21	5.34738e-19	Bacteria	Firmicutes	Bacilli	Lactobacillales	Lactobacillaceae	Lactobacillus	ASV734	28-42	2.51641e-19
9.26922	40.28	4.48318	8.98469	2.59468e-19	3.28527e-17	Bacteria	Bacteroidetes	Bacteroidia	Flavobacteriales	Flavobacteriaceae	Flavobacterium	ASV776	28-42	1.62699e-17
4.48414	-30.3916	3.97017	-7.65498	1.9334e-14	7.57708e-13	Bacteria	Firmicutes	Bacilli	Bacillales	Paenibacillaceae	Paenibacillus	ASV947	28-42	5.83922e-13
3.46672	-29.2743	4.63455	-6.31654	2.67484e-10	3.8621e-09	Bacteria	Bacteroidetes	Bacteroidia	Flavobacteriales	Flavobacteriaceae	Flavobacterium	ASV1145	28-42	4.20314e-09
1.6303	25.7827	4.6174	5.58381	2.35305e-08	2.03848e-07	Bacteria	Proteobacteria	Alphaproteobacteria	Sphingomonadales	Sphingomonadaceae	Rhizorhapis	ASV1465	28-42	2.35448e-07
3.89722	34.2468	4.61887	7.41453	1.22061e-13	3.65297e-12	Bacteria	Bacteroidetes	Bacteroidia	Cytophagales	Spirosomaceae	Dyadobacter	ASV1108	28-42	3.16399e-12
0.279979	25.4348	4.62579	5.49847	3.83091e-08	3.12162e-07	Bacteria	Proteobacteria	Alphaproteobacteria	Rhodobacterales	Rhodobacteraceae	unclassified	ASV3279	28-42	3.70378e-07
187.637	3.37984	0.951131	3.5535	0.000380143	0.00201195	Bacteria	Bacteroidetes	Bacteroidia	Chitinophagales	Chitinophagaceae	Filimonas	ASV99	28-42	0.0021764
3.23803	30.1057	4.60148	6.54262	6.04513e-11	1.08155e-09	Bacteria	Bacteroidetes	Bacteroidia	unclassified	unclassified	unclassified	ASV1207	28-42	1.07281e-09
27.1421	8.99228	2.17014	4.14364	3.4184e-05	0.000212328	Bacteria	Proteobacteria	Gammaproteobacteria	Pseudomonadales	Moraxellaceae	Alkanindiges	ASV436	28-42	0.000234445
7.21617	16.6557	4.02682	4.1362	3.53105e-05	0.0002185	Bacteria	Gemmatimonadetes	Gemmatimonadetes	Gemmatimonadales	Gemmatimonadaceae	unclassified	ASV785	28-42	0.000241416
18.8045	30.8115	4.63441	6.64843	2.9623e-11	5.7364e-10	Bacteria	Firmicutes	Bacilli	Bacillales	Paenibacillaceae	Paenibacillus	ASV518	28-42	5.46324e-10
212.838	-3.48522	1.1119	-3.13447	0.00172167	0.00821412	Bacteria	Proteobacteria	Gammaproteobacteria	Betaproteobacteriales	Burkholderiaceae	unclassified	ASV67	28-42	0.0087606
3.02947	29.4554	4.63451	6.35567	2.07521e-10	3.07729e-09	Bacteria	Proteobacteria	Alphaproteobacteria	Rhizobiales	A0839	unclassified	ASV1183	28-42	3.3163e-09
17.2795	28.4907	4.63394	6.14827	7.83316e-10	1.0073e-08	Bacteria	Acidobacteria	Acidobacteriia	Solibacterales	Solibacteraceae_(Subgroup_3)	Bryobacter	ASV521	28-42	1.11631e-08
3.00709	29.094	4.63496	6.27708	3.44995e-10	4.85352e-09	Bacteria	Bacteroidetes	Bacteroidia	Sphingobacteriales	Sphingobacteriaceae	Mucilaginibacter	ASV1185	28-42	5.30713e-09
12.2204	-36.8763	4.34558	-8.48595	2.13972e-17	1.67713e-15	Bacteria	Firmicutes	Bacilli	Bacillales	Paenibacillaceae	Paenibacillus	ASV648	28-42	1.04355e-15
2.60753	-29.987	4.5988	-6.52061	7.00205e-11	1.20056e-09	Bacteria	Bacteroidetes	Bacteroidia	Chitinophagales	Chitinophagaceae	unclassified	ASV1379	28-42	1.21962e-09
2.18568	-30.3097	4.61677	-6.56514	5.19852e-11	9.61434e-10	Bacteria	Bacteroidetes	Bacteroidia	Chitinophagales	Chitinophagaceae	Filimonas	ASV1420	28-42	9.32617e-10
5.05021	30.2669	4.63455	6.53071	6.54572e-11	1.13691e-09	Bacteria	Bacteroidetes	Bacteroidia	Flavobacteriales	Crocinitomicaceae	Fluviicola	ASV977	28-42	1.14596e-09
1.14148	19.4577	4.61735	4.21406	2.50826e-05	0.000158792	Bacteria	Actinobacteria	Actinobacteria	Corynebacteriales	Mycobacteriaceae	Mycobacterium	ASV1454	28-42	0.00017494
63.7853	8.3659	1.76733	4.73363	2.20536e-06	1.60621e-05	Bacteria	Proteobacteria	Gammaproteobacteria	Betaproteobacteriales	Burkholderiaceae	unclassified	ASV240	28-42	1.7838e-05
8.98215	-30.4075	4.19615	-7.24654	4.27557e-13	1.17293e-11	Bacteria	Bacteroidetes	Bacteroidia	Chitinophagales	Chitinophagaceae	Taibaiella	ASV724	28-42	1.01994e-11
109.802	-5.22495	1.56848	-3.33123	0.000864634	0.00429966	Bacteria	Proteobacteria	Gammaproteobacteria	Pseudomonadales	Pseudomonadaceae	Pseudomonas	ASV118	28-42	0.00461325
18.9688	32.6864	4.56282	7.16364	7.85603e-13	2.03925e-11	Bacteria	Proteobacteria	Gammaproteobacteria	Pseudomonadales	Moraxellaceae	Cavicella	ASV526	28-42	1.80854e-11
22.7987	-18.5091	3.39497	-5.45192	4.98281e-08	4.02045e-07	Bacteria	Bacteroidetes	Bacteroidia	Sphingobacteriales	Sphingobacteriaceae	Sphingobacterium	ASV451	28-42	4.73403e-07
0.798543	17.2346	4.62164	3.72911	0.000192158	0.00105783	Bacteria	Fibrobacteres	Fibrobacteria	Fibrobacterales	possible_family_01	unclassified	ASV1694	28-42	0.00115225
15.4737	26.813	4.63563	5.78413	7.28902e-09	7.22754e-08	Bacteria	Bacteroidetes	Bacteroidia	Chitinophagales	Chitinophagaceae	Ferruginibacter	ASV572	28-42	8.10657e-08
1.528	22.1954	4.61659	4.80775	1.52641e-06	1.12164e-05	Bacteria	Firmicutes	Bacilli	Bacillales	unclassified	unclassified	ASV1461	28-42	1.25467e-05
20.2104	19.2102	4.60223	4.17411	2.9915e-05	0.000188659	Bacteria	Epsilonbacteraeota	Campylobacteria	Campylobacterales	Arcobacteraceae	Arcobacter	ASV368	28-42	0.000206891
0.864921	-19.9945	4.6195	-4.32827	1.50285e-05	9.73891e-05	Bacteria	Actinobacteria	Thermoleophilia	Solirubrobacterales	Solirubrobacteraceae	Conexibacter	ASV1840	28-42	0.000109213
1.8629	33.7807	4.58336	7.37029	1.70257e-13	4.83176e-12	Bacteria	Proteobacteria	Deltaproteobacteria	Oligoflexales	Oligoflexaceae	unclassified	ASV1580	28-42	4.2949e-12
0.566419	27.3148	4.62475	5.90622	3.50053e-09	3.76593e-08	Bacteria	Bacteroidetes	Bacteroidia	Flavobacteriales	NS9_marine_group	unclassified	ASV2601	28-42	4.19045e-08
47.6001	-13.144	4.56065	-2.88204	0.00395108	0.0179306	Bacteria	Bacteroidetes	Bacteroidia	Sphingobacteriales	Sphingobacteriaceae	Pedobacter	ASV327	28-42	0.0190998
2.29126	34.8571	4.59837	7.58032	3.44704e-14	1.2072e-12	Bacteria	Proteobacteria	Alphaproteobacteria	Caulobacterales	Caulobacteraceae	Phenylobacterium	ASV1317	28-42	9.91061e-13
4.14987	26.9976	4.63488	5.82488	5.71545e-09	5.87976e-08	Bacteria	Bacteroidetes	Bacteroidia	Flavobacteriales	NS9_marine_group	unclassified	ASV1007	28-42	6.51047e-08
1.45437	24.6866	4.63649	5.32441	1.01279e-07	8.01467e-07	Bacteria	Bacteroidetes	Bacteroidia	Flavobacteriales	Flavobacteriaceae	Flavobacterium	ASV1581	28-42	9.35232e-07
44.7625	-7.93068	1.70316	-4.65645	3.21701e-06	2.29229e-05	Bacteria	Bacteroidetes	Bacteroidia	Sphingobacteriales	Sphingobacteriaceae	Mucilaginibacter	ASV322	28-42	2.55807e-05
28.4257	24.1087	4.63611	5.2002	1.99078e-07	1.54567e-06	Bacteria	Proteobacteria	Gammaproteobacteria	unclassified	unclassified	unclassified	ASV403	28-42	1.79552e-06
3.91202	34.4691	4.60117	7.49137	6.81561e-14	2.19971e-12	Bacteria	Firmicutes	Clostridia	Clostridiales	Ruminococcaceae	Ruminococcus_1	ASV1081	28-42	1.91769e-12
608.279	-9.64461	1.17377	-8.21678	2.09043e-16	1.1865e-14	Bacteria	Proteobacteria	Gammaproteobacteria	Pseudomonadales	Moraxellaceae	Acinetobacter	ASV40	28-42	8.87963e-15
0.881373	28.5947	4.62059	6.18853	6.07265e-10	8.06095e-09	Bacteria	Proteobacteria	Gammaproteobacteria	Legionellales	Legionellaceae	Legionella	ASV2073	28-42	8.86526e-09
76.3681	8.54622	1.49212	5.72757	1.0188e-08	9.63757e-08	Bacteria	Proteobacteria	Gammaproteobacteria	Betaproteobacteriales	Rhodocyclaceae	Uliginosibacterium	ASV191	28-42	1.09425e-07
1.40568	-19.7976	4.61888	-4.28625	1.81717e-05	0.000116384	Bacteria	Proteobacteria	Alphaproteobacteria	Rhizobiales	Xanthobacteraceae	unclassified	ASV1430	28-42	0.000130472
32.6837	5.7693	2.0517	2.81196	0.00492403	0.0216132	Bacteria	Proteobacteria	Alphaproteobacteria	Rhizobiales	Xanthobacteraceae	Bradyrhizobium	ASV349	28-42	0.0233909
81.1856	-4.34373	1.40436	-3.09304	0.00198119	0.00936251	Bacteria	Bacteroidetes	Bacteroidia	Flavobacteriales	Weeksellaceae	unclassified	ASV211	28-42	0.00995738
2.42866	28.6186	4.61637	6.19937	5.66879e-10	7.64822e-09	Bacteria	Bacteroidetes	Bacteroidia	Flavobacteriales	Flavobacteriaceae	Flavobacterium	ASV1307	28-42	8.38727e-09
3.03701	29.5898	4.63451	6.38467	1.71764e-10	2.61781e-09	Bacteria	Bacteroidetes	Bacteroidia	Chitinophagales	Chitinophagaceae	unclassified	ASV1211	28-42	2.79233e-09
2.12796	17.6677	4.62084	3.82348	0.000131583	0.000734186	Bacteria	Bacteroidetes	Bacteroidia	Bacteroidales	Dysgonomonadaceae	Dysgonomonas	ASV1128	28-42	0.000808152
17.2973	6.84973	2.55445	2.68148	0.00732964	0.0313366	Bacteria	Bacteroidetes	Bacteroidia	Cytophagales	Cytophagaceae	Cytophaga	ASV533	28-42	0.0337
52.1501	4.13523	1.47969	2.79465	0.0051956	0.0226843	Bacteria	Actinobacteria	Actinobacteria	Micrococcales	Microbacteriaceae	unclassified	ASV272	28-42	0.0245218
135.975	15.6217	4.63381	3.37125	0.000748276	0.00376655	Bacteria	Proteobacteria	Gammaproteobacteria	Xanthomonadales	Xanthomonadaceae	unclassified	ASV65	28-42	0.00402504
159.028	-5.0661	1.46468	-3.45884	0.0005425	0.00278179	Bacteria	Bacteroidetes	Bacteroidia	Bacteroidales	Dysgonomonadaceae	Dysgonomonas	ASV136	28-42	0.00300153
7.29867	30.2061	4.63455	6.51761	7.1438e-11	1.21224e-09	Bacteria	Proteobacteria	Alphaproteobacteria	Sphingomonadales	Sphingomonadaceae	Novosphingobium	ASV800	28-42	1.24102e-09
27.8751	-33.7839	4.31356	-7.83202	4.80077e-15	2.19502e-13	Bacteria	Proteobacteria	Alphaproteobacteria	Rhizobiales	Rhizobiaceae	unclassified	ASV432	28-42	1.62929e-13
24.967	6.15024	2.09658	2.93347	0.00335199	0.0154117	Bacteria	Proteobacteria	Gammaproteobacteria	Betaproteobacteriales	Burkholderiaceae	unclassified	ASV331	28-42	0.016372
6.69736	34.9509	4.61584	7.57195	3.67668e-14	1.26079e-12	Bacteria	Spirochaetes	Spirochaetia	Spirochaetales	Spirochaetaceae	Spirochaeta_2	ASV794	28-42	1.05249e-12
520.411	-9.1138	1.79917	-5.06557	4.07189e-07	3.06043e-06	Bacteria	Bacteroidetes	Bacteroidia	Chitinophagales	unclassified	unclassified	ASV43	28-42	3.56034e-06
41.4371	8.96828	1.97986	4.52975	5.90534e-06	4.03327e-05	Bacteria	Proteobacteria	Gammaproteobacteria	Betaproteobacteriales	Burkholderiaceae	unclassified	ASV328	28-42	4.53673e-05
3.68303	31.9265	4.61591	6.91661	4.62573e-12	1.02891e-10	Bacteria	Proteobacteria	Alphaproteobacteria	Rhizobiales	Devosiaceae	unclassified	ASV1104	28-42	9.57729e-11
43.5064	-7.30855	2.42753	-3.0107	0.0026065	0.0121195	Bacteria	Proteobacteria	Gammaproteobacteria	Pseudomonadales	Pseudomonadaceae	Pseudomonas	ASV330	28-42	0.0128741
22.6641	8.64057	2.56764	3.36518	0.000764948	0.00383873	Bacteria	Verrucomicrobia	Verrucomicrobiae	Verrucomicrobiales	Verrucomicrobiaceae	Prosthecobacter	ASV482	28-42	0.00410801
32.7554	-6.76511	1.94415	-3.47973	0.000501911	0.00258171	Bacteria	Proteobacteria	Alphaproteobacteria	Rhodobacterales	Rhodobacteraceae	Ketogulonicigenium	ASV352	28-42	0.00279339
2.77993	-21.5562	4.60373	-4.68233	2.83629e-06	2.03866e-05	Bacteria	Proteobacteria	Alphaproteobacteria	Acetobacterales	Acetobacteraceae	Acetobacter	ASV1132	28-42	2.27179e-05
0.436288	16.7116	4.63611	3.60466	0.000312558	0.00166495	Bacteria	Firmicutes	Clostridia	Clostridiales	Ruminococcaceae	Ruminococcaceae_NK4A214_group	ASV2230	28-42	0.00180516
12.4497	-31.1197	4.63415	-6.71529	1.87692e-11	3.72218e-10	Bacteria	Bacteroidetes	Bacteroidia	Sphingobacteriales	Sphingobacteriaceae	unclassified	ASV663	28-42	3.56128e-10
4.37767	-32.385	4.62123	-7.00787	2.41979e-12	5.77242e-11	Bacteria	Actinobacteria	Actinobacteria	Micrococcales	Microbacteriaceae	unclassified	ASV1054	28-42	5.17269e-11
97.1052	-7.16574	1.53464	-4.66933	3.02191e-06	2.16263e-05	Bacteria	Verrucomicrobia	Verrucomicrobiae	Verrucomicrobiales	Rubritaleaceae	Luteolibacter	ASV171	28-42	2.41459e-05
63.8943	4.57334	1.48694	3.07566	0.00210036	0.00987769	Bacteria	Actinobacteria	Actinobacteria	Micrococcales	Microbacteriaceae	Galbitalea	ASV204	28-42	0.0104737
1.14669	-26.6534	4.61798	-5.77165	7.84967e-09	7.69081e-08	Bacteria	Bacteroidetes	Bacteroidia	Bacteroidales	Dysgonomonadaceae	Dysgonomonas	ASV1674	28-42	8.68609e-08
27.7777	6.30608	1.88258	3.3497	0.000808989	0.0040474	Bacteria	Bacteroidetes	Bacteroidia	Chitinophagales	Chitinophagaceae	unclassified	ASV424	28-42	0.00433392
61.1929	9.20818	1.52765	6.02769	1.66325e-09	1.94164e-08	Bacteria	Planctomycetes	Planctomycetacia	Planctomycetales	Rubinisphaeraceae	Planctomicrobium	ASV236	28-42	2.13466e-08
465.494	-3.3339	1.1646	-2.8627	0.00420042	0.0187368	Bacteria	Proteobacteria	Gammaproteobacteria	Enterobacteriales	Enterobacteriaceae	unclassified	ASV57	28-42	0.0202013
79.6124	-28.5889	3.35392	-8.52402	1.54108e-17	1.26831e-15	Bacteria	Proteobacteria	Gammaproteobacteria	Pseudomonadales	Moraxellaceae	Acinetobacter	ASV189	28-42	7.74542e-16
2421.35	-6.26648	1.02317	-6.12455	9.0938e-10	1.15142e-08	Bacteria	Proteobacteria	Gammaproteobacteria	Pseudomonadales	Moraxellaceae	Acinetobacter	ASV5	28-42	1.25521e-08
40.8017	6.14212	1.67503	3.66686	0.000245546	0.00133389	Bacteria	Proteobacteria	Alphaproteobacteria	Rhizobiales	Xanthobacteraceae	unclassified	ASV324	28-42	0.00144475
10.0399	30.0641	4.4732	6.72094	1.80553e-11	3.62427e-10	Bacteria	Bacteroidetes	Bacteroidia	Sphingobacteriales	Sphingobacteriaceae	Mucilaginibacter	ASV697	28-42	3.44568e-10
68.2076	9.04326	1.48849	6.07544	1.23644e-09	1.50755e-08	Bacteria	Bacteroidetes	Bacteroidia	Flavobacteriales	Weeksellaceae	Chryseobacterium	ASV207	28-42	1.66478e-08
9.98239	40.9975	4.58026	8.9509	3.52608e-19	4.14566e-17	Bacteria	Bacteroidetes	Bacteroidia	Chitinophagales	Chitinophagaceae	unclassified	ASV718	28-42	2.19016e-17
5.69226	30.6365	4.62856	6.61902	3.61582e-11	6.92052e-10	Bacteria	Bacteroidetes	Bacteroidia	Sphingobacteriales	Sphingobacteriaceae	unclassified	ASV883	28-42	6.63136e-10
2.05285	-21.1526	4.61691	-4.58155	4.6154e-06	3.21905e-05	Bacteria	Proteobacteria	Alphaproteobacteria	Sphingomonadales	Sphingomonadaceae	Sphingomonas	ASV1364	28-42	3.59194e-05
28.5561	23.6174	2.33243	10.1257	4.25115e-24	7.77488e-22	Bacteria	Actinobacteria	Actinobacteria	Micrococcales	Demequinaceae	unclassified	ASV399	28-42	4.30609e-22
5.60652	26.5149	4.42896	5.98672	2.14116e-09	2.43058e-08	Bacteria	Proteobacteria	Alphaproteobacteria	Rhizobiales	Devosiaceae	unclassified	ASV904	28-42	2.67213e-08
126.631	-2.34421	0.778384	-3.01164	0.00259838	0.012116	Bacteria	Proteobacteria	Gammaproteobacteria	Pseudomonadales	Pseudomonadaceae	Pseudomonas	ASV139	28-42	0.0128436
4.59725	-30.1564	4.63475	-6.5066	7.68711e-11	1.27808e-09	Bacteria	Proteobacteria	Gammaproteobacteria	Betaproteobacteriales	Methylophilaceae	Methylotenera	ASV1033	28-42	1.3284e-09
10.1102	27.8374	4.63506	6.00583	1.90353e-09	2.17584e-08	Bacteria	Proteobacteria	Alphaproteobacteria	Micavibrionales	unclassified	unclassified	ASV696	28-42	2.41017e-08
1.71526	-39.7373	4.60313	-8.63267	5.99337e-18	5.19215e-16	Bacteria	Proteobacteria	Alphaproteobacteria	Rickettsiales	Rickettsiaceae	unclassified	ASV1619	28-42	3.13177e-16
15.371	7.1106	2.41589	2.94326	0.00324775	0.0149742	Bacteria	Bacteroidetes	Bacteroidia	Chitinophagales	Chitinophagaceae	unclassified	ASV583	28-42	0.0158747
3.5707	26.9037	4.63462	5.80496	6.43822e-09	6.50142e-08	Bacteria	Proteobacteria	Alphaproteobacteria	Rhodobacterales	Rhodobacteraceae	unclassified	ASV1153	28-42	7.27089e-08
48.627	9.08117	1.5917	5.70534	1.16114e-08	1.08593e-07	Bacteria	Actinobacteria	Thermoleophilia	Solirubrobacterales	Solirubrobacteraceae	unclassified	ASV286	28-42	1.23505e-07
29.1211	-22.3576	4.63408	-4.8246	1.40282e-06	1.04011e-05	Bacteria	Proteobacteria	Alphaproteobacteria	Rhizobiales	Rhizobiaceae	Allorhizobium-Neorhizobium-Pararhizobium-Rhizobium	ASV434	28-42	1.15887e-05
12.9233	42.6188	4.59754	9.26993	1.86262e-20	2.78716e-18	Bacteria	Bacteroidetes	Bacteroidia	Chitinophagales	Chitinophagaceae	Filimonas	ASV674	28-42	1.34764e-18
2.84547	18.965	4.62325	4.10209	4.09427e-05	0.000249599	Bacteria	Actinobacteria	Acidimicrobiia	Microtrichales	Iamiaceae	Iamia	ASV1117	28-42	0.000277618
5.02664	26.2639	4.46382	5.88374	4.011e-09	4.23212e-08	Bacteria	Proteobacteria	Deltaproteobacteria	Myxococcales	BIrii41	unclassified	ASV944	28-42	4.69901e-08
35.1407	8.01568	1.8464	4.34125	1.41673e-05	9.21713e-05	Bacteria	Proteobacteria	Gammaproteobacteria	Betaproteobacteriales	Rhodocyclaceae	unclassified	ASV369	28-42	0.000103297
5.87908	19.278	4.6343	4.15985	3.18452e-05	0.000199305	Bacteria	Acidobacteria	Blastocatellia_(Subgroup_4)	Blastocatellales	Blastocatellaceae	unclassified	ASV987	28-42	0.000219089
5.69566	24.8686	4.14037	6.00638	1.89712e-09	2.17584e-08	Bacteria	Acidobacteria	Blastocatellia_(Subgroup_4)	Blastocatellales	Blastocatellaceae	Blastocatella	ASV897	28-42	2.40668e-08
12.0756	-39.5065	2.64932	-14.912	2.75579e-50	2.26801e-47	Bacteria	Bacteroidetes	Bacteroidia	Flavobacteriales	Weeksellaceae	Chryseobacterium	ASV688	28-42	1.51201e-47
1.33184	28.236	4.61786	6.11452	9.68462e-10	1.21686e-08	Bacteria	Bacteroidetes	Bacteroidia	Flavobacteriales	NS9_marine_group	unclassified	ASV1706	28-42	1.32841e-08
24.0051	8.4097	2.58659	3.25126	0.00114893	0.0055951	Bacteria	Proteobacteria	Gammaproteobacteria	Betaproteobacteriales	Burkholderiaceae	unclassified	ASV479	28-42	0.00599411
7.85578	-15.8567	4.63763	-3.41913	0.000628209	0.00320134	Bacteria	Firmicutes	Bacilli	Lactobacillales	Leuconostocaceae	Leuconostoc	ASV612	28-42	0.00343818
4.49256	30.215	4.6166	6.54487	5.95453e-11	1.07705e-09	Bacteria	Verrucomicrobia	Verrucomicrobiae	Chthoniobacterales	Chthoniobacteraceae	Chthoniobacter	ASV976	28-42	1.05958e-09
41.5653	-16.3997	4.63563	-3.53776	0.000403536	0.00211535	Bacteria	Proteobacteria	Alphaproteobacteria	Acetobacterales	Acetobacteraceae	Komagataeibacter	ASV162	28-42	0.00229923
1.4664	27.0263	4.63765	5.82759	5.6232e-09	5.82125e-08	Bacteria	Bacteroidetes	Bacteroidia	Chitinophagales	Chitinophagaceae	unclassified	ASV1629	28-42	6.42763e-08
26.5544	-33.5006	4.11557	-8.13998	3.95339e-16	2.16909e-14	Bacteria	Bacteroidetes	Bacteroidia	Sphingobacteriales	Sphingobacteriaceae	unclassified	ASV408	28-42	1.62682e-14
381.404	12.5012	1.14451	10.9228	8.96597e-28	2.9516e-25	Bacteria	Proteobacteria	Deltaproteobacteria	Myxococcales	Sandaracinaceae	unclassified	ASV55	28-42	1.256e-25
6.57184	38.6012	4.58049	8.4273	3.53718e-17	2.64645e-15	Bacteria	Verrucomicrobia	Verrucomicrobiae	Opitutales	Opitutaceae	Lacunisphaera	ASV878	28-42	1.66349e-15
2.2799	28.9587	4.6172	6.27191	3.5665e-10	4.93316e-09	Bacteria	Bacteroidetes	Bacteroidia	Chitinophagales	Chitinophagaceae	Pseudoflavitalea	ASV1382	28-42	5.46089e-09
3.61558	29.7878	4.61596	6.45322	1.09497e-10	1.74982e-09	Bacteria	Bacteroidetes	Bacteroidia	Sphingobacteriales	Sphingobacteriaceae	unclassified	ASV1110	28-42	1.83442e-09
18.0983	22.0768	2.76177	7.99374	1.30907e-15	6.15635e-14	Bacteria	Proteobacteria	Gammaproteobacteria	Steroidobacterales	Steroidobacteraceae	Steroidobacter	ASV513	28-42	4.73566e-14
0.795145	17.6405	4.61825	3.81974	0.00013359	0.000742868	Bacteria	Proteobacteria	Alphaproteobacteria	Micropepsales	Micropepsaceae	unclassified	ASV1783	28-42	0.000818191
5.34359	23.481	4.58485	5.12144	3.03208e-07	2.31056e-06	Bacteria	Gemmatimonadetes	Gemmatimonadetes	Gemmatimonadales	Gemmatimonadaceae	unclassified	ASV926	28-42	2.69046e-06
2.40079	38.1058	4.59858	8.28641	1.16714e-16	7.68447e-15	Bacteria	Proteobacteria	Alphaproteobacteria	Rhizobiales	Devosiaceae	unclassified	ASV1314	28-42	5.15736e-15
2.1497	-44.4962	4.35716	-10.2122	1.74844e-24	3.59742e-22	Bacteria	Bacteroidetes	Bacteroidia	Flavobacteriales	Weeksellaceae	unclassified	ASV1448	28-42	1.85673e-22
10.8181	-16.9129	4.62649	-3.65567	0.000256515	0.00138279	Bacteria	Proteobacteria	Alphaproteobacteria	Rhizobiales	Xanthobacteraceae	unclassified	ASV662	28-42	0.00149857
6.37729	31.5833	4.40015	7.17776	7.08606e-13	1.88124e-11	Bacteria	Proteobacteria	Alphaproteobacteria	Rhodobacterales	Rhodobacteraceae	unclassified	ASV902	28-42	1.64857e-11
35.2599	-8.03065	2.06459	-3.88971	0.000100362	0.000569644	Bacteria	Bacteroidetes	Bacteroidia	Sphingobacteriales	Sphingobacteriaceae	Sphingobacterium	ASV391	28-42	0.000631727
124.366	2.68328	0.943615	2.84361	0.00446052	0.0197898	Bacteria	Proteobacteria	Alphaproteobacteria	Sphingomonadales	Sphingomonadaceae	Sphingopyxis	ASV137	28-42	0.0213742
16.9079	-11.685	4.54456	-2.5712	0.0101346	0.0426639	Bacteria	Bacteroidetes	Bacteroidia	Sphingobacteriales	Sphingobacteriaceae	Mucilaginibacter	ASV587	28-42	0.0451464
0.467555	-25.5747	4.62382	-5.53108	3.18267e-08	2.64686e-07	Bacteria	Firmicutes	Bacilli	Bacillales	Paenibacillaceae	Paenibacillus	ASV2703	28-42	3.11488e-07
4.1683	26.4558	4.50084	5.87796	4.15341e-09	4.35447e-08	Bacteria	Proteobacteria	Alphaproteobacteria	Rhizobiales	Hyphomicrobiaceae	Hyphomicrobium	ASV1024	28-42	4.84001e-08
3.98636	32.2041	4.61587	6.97682	3.01942e-12	7.09995e-11	Bacteria	Proteobacteria	Gammaproteobacteria	Betaproteobacteriales	Methylophilaceae	unclassified	ASV1022	28-42	6.43361e-11
3.25779	-30.5194	4.61605	-6.61157	3.80252e-11	7.1942e-10	Bacteria	Bacteroidetes	Bacteroidia	Flavobacteriales	Flavobacteriaceae	Flavobacterium	ASV1146	28-42	6.93513e-10
1.3178	24.4071	4.61823	5.28494	1.25749e-07	9.85631e-07	Bacteria	Verrucomicrobia	Verrucomicrobiae	Pedosphaerales	Pedosphaeraceae	unclassified	ASV1615	28-42	1.15311e-06
5.0339	-20.0429	4.63584	-4.32347	1.53596e-05	9.91448e-05	Bacteria	Proteobacteria	Alphaproteobacteria	Rhizobiales	Xanthobacteraceae	unclassified	ASV664	28-42	0.000111374
207.068	-5.68158	1.41635	-4.01142	6.0354e-05	0.00035778	Bacteria	Bacteroidetes	Bacteroidia	Flavobacteriales	Flavobacteriaceae	Flavobacterium	ASV97	28-42	0.000396974
6.25141	26.6047	4.63547	5.73938	9.50255e-09	9.09372e-08	Bacteria	Proteobacteria	Gammaproteobacteria	Xanthomonadales	Xanthomonadaceae	Pseudoxanthomonas	ASV881	28-42	1.03072e-07
961.93	-3.19279	0.719635	-4.43668	9.13553e-06	6.08789e-05	Bacteria	Bacteroidetes	Bacteroidia	Sphingobacteriales	Sphingobacteriaceae	Pedobacter	ASV20	28-42	6.83504e-05
0.281761	17.1327	4.62381	3.70533	0.00021112	0.0011545	Bacteria	Bacteroidetes	Bacteroidia	Cytophagales	Spirosomaceae	Leadbetterella	ASV2741	28-42	0.00125679
49.4343	7.22628	1.64022	4.40569	1.0545e-05	6.97071e-05	Bacteria	Bacteroidetes	Bacteroidia	Chitinophagales	Chitinophagaceae	Flavitalea	ASV283	28-42	7.83614e-05
5.59664	-31.9636	4.61574	-6.92492	4.36219e-12	9.92305e-11	Bacteria	Firmicutes	Bacilli	Bacillales	Paenibacillaceae	Paenibacillus	ASV872	28-42	9.14671e-11
39.8752	-8.94424	1.57809	-5.66776	1.44676e-08	1.31567e-07	Bacteria	Firmicutes	Bacilli	Bacillales	Paenibacillaceae	Paenibacillus	ASV346	28-42	1.50332e-07
43.4466	-7.30001	1.7576	-4.15341	3.27563e-05	0.000204231	Bacteria	Proteobacteria	Alphaproteobacteria	Caulobacterales	Caulobacteraceae	Brevundimonas	ASV320	28-42	0.000225123
3.44066	-30.1483	4.61665	-6.53035	6.56174e-11	1.13691e-09	Bacteria	Bacteroidetes	Bacteroidia	Flavobacteriales	Crocinitomicaceae	Fluviicola	ASV1176	28-42	1.14596e-09
18.7302	25.8417	4.63506	5.57527	2.47153e-08	2.12991e-07	Bacteria	Proteobacteria	Alphaproteobacteria	Rhizobiales	Rhizobiaceae	unclassified	ASV534	28-42	2.4618e-07
43.6513	-6.41051	1.87716	-3.41501	0.000637788	0.00324012	Bacteria	Firmicutes	Bacilli	Bacillales	Paenibacillaceae	Paenibacillus	ASV210	28-42	0.0034877
3.85225	20.4433	3.96537	5.15546	2.53004e-07	1.94601e-06	Bacteria	Proteobacteria	Alphaproteobacteria	Rhizobiales	Xanthobacteraceae	Pseudorhodoplanes	ASV992	28-42	2.26022e-06
1.70986	15.7804	4.63455	3.40494	0.000661778	0.00335165	Bacteria	Bacteroidetes	Bacteroidia	Cytophagales	Microscillaceae	unclassified	ASV1445	28-42	0.00360691
0.494486	25.4834	4.62585	5.50892	3.61036e-08	2.95654e-07	Bacteria	Proteobacteria	Alphaproteobacteria	Rhizobiales	Xanthobacteraceae	Azorhizobium	ASV2634	28-42	3.51117e-07
6.04027	38.7228	4.59801	8.42164	3.71238e-17	2.65677e-15	Bacteria	Verrucomicrobia	Verrucomicrobiae	Verrucomicrobiales	Verrucomicrobiaceae	Prosthecobacter	ASV877	28-42	1.7335e-15
2.31479	27.1691	4.6167	5.88496	3.98148e-09	4.22807e-08	Bacteria	Proteobacteria	Alphaproteobacteria	Rhizobiales	Devosiaceae	unclassified	ASV1374	28-42	4.67274e-08
3.7768	24.4474	4.63416	5.27548	1.32406e-07	1.03289e-06	Bacteria	Bacteroidetes	Bacteroidia	Cytophagales	Cytophagaceae	Cytophaga	ASV1340	28-42	1.2091e-06
1334.84	2.42451	0.736993	3.28973	0.00100283	0.00494208	Bacteria	Bacteroidetes	Bacteroidia	Chitinophagales	Chitinophagaceae	Chitinophaga	ASV11	28-42	0.00529905
14.0534	26.2749	4.63506	5.66872	1.43866e-08	1.31558e-07	Bacteria	Bacteroidetes	Bacteroidia	Cytophagales	Microscillaceae	unclassified	ASV591	28-42	1.49876e-07
0.852448	26.0943	4.61891	5.64946	1.60951e-08	1.44768e-07	Bacteria	Proteobacteria	Alphaproteobacteria	Sphingomonadales	Sphingomonadaceae	Sphingomonas	ASV2068	28-42	1.66358e-07
131.004	-26.0841	2.41999	-10.7786	4.34383e-27	1.19166e-24	Bacteria	Proteobacteria	Gammaproteobacteria	Pseudomonadales	Moraxellaceae	Acinetobacter	ASV116	28-42	5.6078e-25
92.4649	-2.9292	1.11385	-2.62979	0.00854387	0.0361235	Bacteria	Bacteroidetes	Bacteroidia	Flavobacteriales	Flavobacteriaceae	Flavobacterium	ASV188	28-42	0.0387416
81.5759	-5.89015	1.48853	-3.95702	7.58901e-05	0.000442672	Bacteria	Proteobacteria	Gammaproteobacteria	Pseudomonadales	Pseudomonadaceae	Pseudomonas	ASV186	28-42	0.000489863
324.844	-7.24404	1.84977	-3.91619	8.99578e-05	0.000517729	Bacteria	Bacteroidetes	Bacteroidia	Flavobacteriales	Weeksellaceae	Chryseobacterium	ASV71	28-42	0.00057115
1.52127	24.5274	4.63617	5.29045	1.22018e-07	9.60963e-07	Bacteria	Proteobacteria	Alphaproteobacteria	Sphingomonadales	Sphingomonadaceae	Ellin6055	ASV1582	28-42	1.12045e-06
1.40685	34.0404	4.60304	7.39519	1.41204e-13	4.1504e-12	Bacteria	Bacteroidetes	Bacteroidia	Sphingobacteriales	Sphingobacteriaceae	Mucilaginibacter	ASV1757	28-42	3.61746e-12
1.48799	28.5053	4.63507	6.14992	7.75207e-10	1.00472e-08	Bacteria	Proteobacteria	Alphaproteobacteria	Rhizobiales	Rhizobiaceae	unclassified	ASV1541	28-42	1.10715e-08
0.646296	-34.1485	4.60433	-7.4166	1.20165e-13	3.65297e-12	Bacteria	Firmicutes	Clostridia	Clostridiales	Peptococcaceae	Desulfosporosinus	ASV2511	28-42	3.12715e-12
493.764	-9.74199	1.76032	-5.53421	3.12634e-08	2.62549e-07	Bacteria	Bacteroidetes	Bacteroidia	Chitinophagales	unclassified	unclassified	ASV44	28-42	3.06764e-07
81.3581	-7.07329	1.56871	-4.50898	6.51388e-06	4.41228e-05	Bacteria	Proteobacteria	Gammaproteobacteria	Pseudomonadales	Moraxellaceae	Acinetobacter	ASV201	28-42	4.97533e-05
0.721574	18.2485	4.61915	3.95061	7.79517e-05	0.000450205	Bacteria	Proteobacteria	Gammaproteobacteria	Methylococcales	Methylomonaceae	Methylobacter	ASV1878	28-42	0.000501205
155.134	-2.91518	1.14291	-2.55066	0.010752	0.0450325	Bacteria	Bacteroidetes	Bacteroidia	Chitinophagales	Chitinophagaceae	Taibaiella	ASV128	28-42	0.0476387
65.7708	6.82321	1.65993	4.11055	3.94722e-05	0.000241529	Bacteria	Proteobacteria	Alphaproteobacteria	Rhizobiales	Xanthobacteraceae	unclassified	ASV216	28-42	0.000267923
75.4142	4.24439	1.30153	3.26109	0.00110985	0.00542081	Bacteria	Bacteroidetes	Bacteroidia	Cytophagales	Spirosomaceae	unclassified	ASV193	28-42	0.00579941
31.2182	6.03838	2.29668	2.62918	0.00855903	0.0361235	Bacteria	Proteobacteria	Alphaproteobacteria	Sphingomonadales	Sphingomonadaceae	Sphingobium	ASV394	28-42	0.0387836
4.74762	33.9043	4.63396	7.31648	2.54556e-13	7.10168e-12	Bacteria	Bacteroidetes	Bacteroidia	Bacteroidales	Bacteroidaceae	Bacteroides	ASV942	28-42	6.23671e-12
132.118	-3.64812	1.26969	-2.87323	0.00406299	0.0183224	Bacteria	Proteobacteria	Gammaproteobacteria	Betaproteobacteriales	Burkholderiaceae	unclassified	ASV146	28-42	0.0195976
3.99973	-35.2761	4.58101	-7.70049	1.35541e-14	5.72053e-13	Bacteria	Bacteroidetes	Bacteroidia	Cytophagales	Spirosomaceae	Dyadobacter	ASV1102	28-42	4.24954e-13
6.25683	23.075	4.59863	5.01779	5.22681e-07	3.89291e-06	Bacteria	Proteobacteria	Alphaproteobacteria	Rhizobiales	Xanthobacteraceae	unclassified	ASV850	28-42	4.50436e-06
3.08049	26.9688	4.63646	5.81668	6.00289e-09	6.13711e-08	Bacteria	Proteobacteria	Alphaproteobacteria	Sphingomonadales	Sphingomonadaceae	unclassified	ASV1202	28-42	6.81431e-08
1.94474	34.6019	4.63488	7.46555	8.29553e-14	2.62585e-12	Bacteria	Actinobacteria	Actinobacteria	Micrococcales	unclassified	unclassified	ASV1386	28-42	2.28526e-12
2452.97	-2.9907	0.709057	-4.21785	2.46645e-05	0.000156748	Bacteria	Proteobacteria	Gammaproteobacteria	Enterobacteriales	Enterobacteriaceae	unclassified	ASV6	28-42	0.000172756
64.5138	9.33296	1.52268	6.12931	8.82588e-10	1.12615e-08	Bacteria	Proteobacteria	Deltaproteobacteria	Myxococcales	Polyangiaceae	Aetherobacter	ASV245	28-42	1.24341e-08
20.9517	-31.1168	4.6154	-6.74195	1.5627e-11	3.21525e-10	Bacteria	Firmicutes	Clostridia	Clostridiales	Lachnospiraceae	Anaerocolumna	ASV599	28-42	3.02612e-10
29.0467	6.7644	1.87904	3.59993	0.000318304	0.00169009	Bacteria	Dependentiae	Babeliae	Babeliales	Vermiphilaceae	unclassified	ASV418	28-42	0.00183673
430.666	-3.06587	0.873915	-3.5082	0.000451152	0.00234258	Bacteria	Bacteroidetes	Bacteroidia	Cytophagales	Spirosomaceae	Dyadobacter	ASV54	28-42	0.00253879
2.74644	20.4784	4.63458	4.4186	9.934e-06	6.59329e-05	Bacteria	Proteobacteria	Alphaproteobacteria	Rhizobiales	Rhizobiaceae	unclassified	ASV1109	28-42	7.40719e-05
169.299	2.5638	0.724326	3.53957	0.000400784	0.00210764	Bacteria	Proteobacteria	Alphaproteobacteria	Rhizobiales	Devosiaceae	Devosia	ASV103	28-42	0.0022886
39.9321	-6.2655	2.09769	-2.98686	0.00281857	0.0130319	Bacteria	Proteobacteria	Alphaproteobacteria	Acetobacterales	Acetobacteraceae	Gluconobacter	ASV300	28-42	0.0138616
21.9067	-27.0157	3.34496	-8.07656	6.66221e-16	3.32303e-14	Bacteria	Firmicutes	Bacilli	Bacillales	Paenibacillaceae	Paenibacillus	ASV502	28-42	2.55023e-14
16.3785	6.59908	2.29924	2.87011	0.00410324	0.0184031	Bacteria	Verrucomicrobia	Verrucomicrobiae	Chthoniobacterales	Xiphinematobacteraceae	Candidatus_Xiphinematobacter	ASV498	28-42	0.0197628
303.266	-5.14165	1.79531	-2.86393	0.00418417	0.0187151	Bacteria	Bacteroidetes	Bacteroidia	Flavobacteriales	Weeksellaceae	Chryseobacterium	ASV72	28-42	0.0201378
18.6673	-8.36269	2.22727	-3.75468	0.000173561	0.000958664	Bacteria	Proteobacteria	Gammaproteobacteria	Pseudomonadales	Moraxellaceae	Acinetobacter	ASV551	28-42	0.00104263
70.459	5.28306	1.30994	4.03305	5.50573e-05	0.000328349	Bacteria	Bacteroidetes	Bacteroidia	Sphingobacteriales	env.OPS_17	unclassified	ASV206	28-42	0.000365421
0.811081	16.7386	4.63693	3.60984	0.000306382	0.00163735	Bacteria	Actinobacteria	Actinobacteria	unclassified	unclassified	unclassified	ASV2231	28-42	0.0017726
30.5103	8.86534	1.87709	4.72291	2.32498e-06	1.68586e-05	Bacteria	Bacteroidetes	Bacteroidia	Cytophagales	unclassified	unclassified	ASV407	28-42	1.87594e-05
3.20509	37.3134	4.5985	8.11427	4.88727e-16	2.59498e-14	Bacteria	Proteobacteria	Gammaproteobacteria	Cellvibrionales	Cellvibrionaceae	Cellvibrio	ASV1259	28-42	1.9741e-14
4.53659	-36.7818	4.58183	-8.02775	9.92725e-16	4.80596e-14	Bacteria	Bacteroidetes	Bacteroidia	Chitinophagales	Chitinophagaceae	Taibaiella	ASV984	28-42	3.69271e-14
5.669	14.8201	4.63432	3.1979	0.0013843	0.006682	Bacteria	Proteobacteria	Alphaproteobacteria	Rhizobiales	Xanthobacteraceae	unclassified	ASV769	28-42	0.00714843
1.86878	19.6128	4.61932	4.24583	2.1779e-05	0.000138947	Bacteria	Chloroflexi	KD4-96	unclassified	unclassified	unclassified	ASV1270	28-42	0.000154186
4.38555	-20.1399	4.60118	-4.37712	1.2026e-05	7.91789e-05	Bacteria	Firmicutes	Bacilli	Bacillales	unclassified	unclassified	ASV1076	28-42	8.84481e-05
5.5046	30.1744	4.63419	6.51125	7.45304e-11	1.25181e-09	Bacteria	Proteobacteria	Alphaproteobacteria	Caulobacterales	Caulobacteraceae	Phenylobacterium	ASV935	28-42	1.29134e-09
12.0055	-40.2852	2.57384	-15.6518	3.23109e-55	5.31837e-52	Bacteria	Firmicutes	Bacilli	Bacillales	Paenibacillaceae	Paenibacillus	ASV685	28-42	2.36372e-52
0.458022	27.5043	4.63862	5.92942	3.04009e-09	3.3139e-08	Bacteria	Planctomycetes	Phycisphaerae	Tepidisphaerales	Tepidisphaeraceae	Tepidisphaera	ASV2603	28-42	3.68618e-08
393.095	-2.79454	0.549431	-5.08624	3.65225e-07	2.75762e-06	Bacteria	Proteobacteria	Alphaproteobacteria	Sphingomonadales	Sphingomonadaceae	Sphingobium	ASV61	28-42	3.19766e-06
537.112	-1.97477	0.746529	-2.64526	0.00816271	0.0347179	Bacteria	Proteobacteria	Gammaproteobacteria	Pseudomonadales	Pseudomonadaceae	Pseudomonas	ASV39	28-42	0.0371669
1.51865	28.543	4.61995	6.1782	6.48384e-10	8.53792e-09	Bacteria	Proteobacteria	Alphaproteobacteria	Rhodobacterales	Rhodobacteraceae	Rhodobacter	ASV1761	28-42	9.42376e-09
39.0644	-28.1282	4.63378	-6.07025	1.27713e-09	1.53443e-08	Bacteria	Bacteroidetes	Bacteroidia	Sphingobacteriales	Sphingobacteriaceae	Mucilaginibacter	ASV344	28-42	1.70216e-08
11.2137	-35.5433	4.61778	-7.69706	1.3923e-14	5.72931e-13	Bacteria	Proteobacteria	Gammaproteobacteria	Xanthomonadales	Xanthomonadaceae	Xanthomonas	ASV735	28-42	4.3445e-13
248.146	-5.84253	1.65234	-3.53592	0.000406359	0.00212338	Bacteria	Proteobacteria	Alphaproteobacteria	Acetobacterales	Acetobacteraceae	Acetobacter	ASV36	28-42	0.00231242
6.98176	27.7265	4.61566	6.00705	1.8893e-09	2.17584e-08	Bacteria	Proteobacteria	Gammaproteobacteria	Betaproteobacteriales	Burkholderiaceae	Aquabacterium	ASV806	28-42	2.40138e-08
33.5019	4.63039	1.65636	2.79552	0.00518164	0.0226834	Bacteria	Bacteroidetes	Bacteroidia	Chitinophagales	Chitinophagaceae	unclassified	ASV378	28-42	0.024491
1.06744	-28.9735	4.61894	-6.27277	3.54689e-10	4.93316e-09	Bacteria	Actinobacteria	Actinobacteria	Micrococcales	Microbacteriaceae	Leifsonia	ASV1821	28-42	5.44352e-09
55.7377	-4.7586	1.45138	-3.27866	0.00104301	0.00510949	Bacteria	Bacteroidetes	Bacteroidia	Flavobacteriales	Weeksellaceae	Chryseobacterium	ASV293	28-42	0.00548057
0.376922	26.2657	4.62546	5.67851	1.35875e-08	1.25646e-07	Bacteria	Proteobacteria	Gammaproteobacteria	Betaproteobacteriales	Burkholderiaceae	unclassified	ASV2932	28-42	1.42907e-07
37.6331	-8.39366	1.74162	-4.81945	1.43953e-06	1.06254e-05	Bacteria	Proteobacteria	Gammaproteobacteria	Betaproteobacteriales	Burkholderiaceae	Comamonas	ASV305	28-42	1.1877e-05
5.7381	39.7319	4.59773	8.64163	5.54188e-18	5.06774e-16	Bacteria	Actinobacteria	Thermoleophilia	Solirubrobacterales	Solirubrobacteraceae	unclassified	ASV884	28-42	2.94256e-16
3.34724	-19.1309	4.6342	-4.1282	3.65607e-05	0.000225389	Bacteria	Proteobacteria	Alphaproteobacteria	Rhizobiales	Rhizobiaceae	unclassified	ASV975	28-42	0.000249705
8.29001	29.564	4.63391	6.37993	1.77173e-10	2.67547e-09	Bacteria	Verrucomicrobia	Verrucomicrobiae	Verrucomicrobiales	Verrucomicrobiaceae	Prosthecobacter	ASV767	28-42	2.87317e-09
2.39408	-16.1494	4.06484	-3.97295	7.09874e-05	0.000417304	Bacteria	Proteobacteria	Gammaproteobacteria	Betaproteobacteriales	Burkholderiaceae	Parapusillimonas	ASV1247	28-42	0.000462296
17.9489	7.79497	2.27254	3.43008	0.000603412	0.00308452	Bacteria	Verrucomicrobia	Verrucomicrobiae	Verrucomicrobiales	Rubritaleaceae	Luteolibacter	ASV543	28-42	0.00331364
264.103	-33.9649	3.16958	-10.7159	8.57136e-27	2.01549e-24	Bacteria	Proteobacteria	Gammaproteobacteria	Pseudomonadales	Moraxellaceae	Acinetobacter	ASV77	28-42	1.08527e-24
30.9036	42.1209	4.56266	9.23166	2.66459e-20	3.65493e-18	Bacteria	Proteobacteria	Gammaproteobacteria	Xanthomonadales	Rhodanobacteraceae	Dokdonella	ASV396	28-42	1.88641e-18
16.1617	18.7236	3.30828	5.65962	1.51711e-08	1.37207e-07	Bacteria	Bacteroidetes	Bacteroidia	Chitinophagales	Chitinophagaceae	unclassified	ASV561	28-42	1.57055e-07
258.712	-2.16806	0.779446	-2.78155	0.00541006	0.0235581	Bacteria	Proteobacteria	Alphaproteobacteria	Sphingomonadales	Sphingomonadaceae	Novosphingobium	ASV79	28-42	0.0254427
39.4506	9.15986	2.01823	4.53856	5.66384e-06	3.9007e-05	Bacteria	Proteobacteria	Gammaproteobacteria	Betaproteobacteriales	Burkholderiaceae	Caenimonas	ASV336	28-42	4.37171e-05
255.643	16.1448	4.63409	3.48392	0.000494124	0.00255763	Bacteria	Proteobacteria	Alphaproteobacteria	Caulobacterales	Caulobacteraceae	Brevundimonas	ASV46	28-42	0.0027574
64.5265	6.13471	1.54631	3.96733	7.2683e-05	0.000425751	Bacteria	Proteobacteria	Gammaproteobacteria	Xanthomonadales	Xanthomonadaceae	Pseudoxanthomonas	ASV229	28-42	0.000472403
24.224	-33.9506	4.20111	-8.08136	6.4051e-16	3.29463e-14	Bacteria	Proteobacteria	Gammaproteobacteria	Pseudomonadales	Pseudomonadaceae	Pseudomonas	ASV452	28-42	2.46615e-14
661.963	3.96021	0.514893	7.69132	1.45625e-14	5.84632e-13	Bacteria	Proteobacteria	Gammaproteobacteria	Xanthomonadales	Rhodanobacteraceae	Dokdonella	ASV31	28-42	4.52263e-13
10.8257	-6.54215	2.40563	-2.71952	0.00653765	0.0280234	Bacteria	Firmicutes	Clostridia	Clostridiales	Lachnospiraceae	Herbinix	ASV737	28-42	0.03027
15.1511	-34.0387	3.09909	-10.9835	4.58977e-28	1.88869e-25	Bacteria	Firmicutes	Bacilli	Bacillales	Paenibacillaceae	Paenibacillus	ASV581	28-42	6.71535e-26
7.54394	28.6091	4.63447	6.17312	6.69566e-10	8.74687e-09	Bacteria	Verrucomicrobia	Verrucomicrobiae	Opitutales	Opitutaceae	Lacunisphaera	ASV772	28-42	9.71018e-09
82.5016	-6.46935	2.22319	-2.90994	0.00361496	0.0165284	Bacteria	Bacteroidetes	Bacteroidia	Flavobacteriales	Weeksellaceae	Chryseobacterium	ASV187	28-42	0.0175652
17.1349	-22.0048	4.6051	-4.77836	1.76727e-06	1.29286e-05	Bacteria	Proteobacteria	Gammaproteobacteria	Betaproteobacteriales	Burkholderiaceae	unclassified	ASV538	28-42	1.44185e-05
0.415822	25.649	4.62308	5.54804	2.88891e-08	2.43854e-07	Bacteria	Armatimonadetes	Fimbriimonadia	Fimbriimonadales	Fimbriimonadaceae	unclassified	ASV2920	28-42	2.84314e-07
0.555993	25.469	4.6225	5.5098	3.59243e-08	2.95654e-07	Bacteria	Proteobacteria	Gammaproteobacteria	Legionellales	Legionellaceae	Legionella	ASV2531	28-42	3.49889e-07
342.568	-3.43368	0.910029	-3.77315	0.000161199	0.000893377	Bacteria	Proteobacteria	Alphaproteobacteria	Rhizobiales	Rhizobiaceae	unclassified	ASV26	28-42	0.000971915
95.0903	4.61395	1.39292	3.31243	0.000924896	0.00458548	Bacteria	Proteobacteria	Alphaproteobacteria	Sphingomonadales	Sphingomonadaceae	Novosphingobium	ASV124	28-42	0.00491486
2.67068	-19.329	4.63516	-4.17007	3.04503e-05	0.000191302	Bacteria	Actinobacteria	Actinobacteria	Propionibacteriales	Nocardioidaceae	Aeromicrobium	ASV891	28-42	0.000210152
1227.76	-1.82069	0.445848	-4.08366	4.43326e-05	0.000268781	Bacteria	Proteobacteria	Alphaproteobacteria	Acetobacterales	Acetobacteraceae	Acetobacter	ASV12	28-42	0.000298452
492.684	-2.10541	0.521058	-4.04064	5.33058e-05	0.000319059	Bacteria	Proteobacteria	Alphaproteobacteria	Sphingomonadales	Sphingomonadaceae	Novosphingobium	ASV45	28-42	0.000355588
106.083	-7.01187	2.47131	-2.83731	0.00454951	0.0201303	Bacteria	Proteobacteria	Gammaproteobacteria	Pseudomonadales	Moraxellaceae	Acinetobacter	ASV169	28-42	0.0217531
1139.69	-6.32555	1.40734	-4.49468	6.96761e-06	4.70028e-05	Bacteria	Proteobacteria	Gammaproteobacteria	Enterobacteriales	Enterobacteriaceae	unclassified	ASV7	28-42	5.28511e-05
3.45638	35.0521	4.59932	7.62115	2.51433e-14	9.40587e-13	Bacteria	Proteobacteria	Alphaproteobacteria	Rhizobiales	Kaistiaceae	Kaistia	ASV1188	28-42	7.45691e-13
11.8888	-9.02465	3.30569	-2.73004	0.00633267	0.0272156	Bacteria	Bacteroidetes	Bacteroidia	Chitinophagales	Chitinophagaceae	unclassified	ASV731	28-42	0.0294243
56.9667	9.36074	1.56484	5.98193	2.20506e-09	2.48597e-08	Bacteria	Actinobacteria	Acidimicrobiia	Microtrichales	Iamiaceae	Iamia	ASV249	28-42	2.73926e-08
10.2061	-40.4246	4.58051	-8.82536	1.09113e-18	1.1225e-16	Bacteria	Proteobacteria	Gammaproteobacteria	Xanthomonadales	Xanthomonadaceae	SN8	ASV792	28-42	6.3575e-17
550.672	-5.25801	1.57485	-3.33874	0.000841595	0.00419778	Bacteria	Proteobacteria	Gammaproteobacteria	Enterobacteriales	Enterobacteriaceae	unclassified	ASV41	28-42	0.00449397
693.407	-5.11498	0.755501	-6.77032	1.28495e-11	2.71158e-10	Bacteria	Bacteroidetes	Bacteroidia	Sphingobacteriales	Sphingobacteriaceae	unclassified	ASV30	28-42	2.5179e-10
536.144	-4.03444	0.660889	-6.10457	1.03077e-09	1.28535e-08	Bacteria	Bacteroidetes	Bacteroidia	Flavobacteriales	Weeksellaceae	Chryseobacterium	ASV42	28-42	1.41094e-08
82.3623	-5.46558	1.90329	-2.87164	0.00408343	0.0183643	Bacteria	Proteobacteria	Gammaproteobacteria	Betaproteobacteriales	Burkholderiaceae	unclassified	ASV181	28-42	0.0196818
2.21095	-26.7353	4.63614	-5.76672	8.08286e-09	7.87241e-08	Bacteria	Proteobacteria	Deltaproteobacteria	Myxococcales	Myxococcaceae	Corallococcus	ASV1366	28-42	8.91416e-08
0.372822	-25.0605	4.62701	-5.41613	6.09034e-08	4.86636e-07	Bacteria	Proteobacteria	Gammaproteobacteria	Betaproteobacteriales	Procabacteriaceae	Procabacter	ASV3510	28-42	5.69585e-07
349.555	3.81689	0.842932	4.52811	5.95149e-06	4.04799e-05	Bacteria	Bacteroidetes	Bacteroidia	Chitinophagales	Chitinophagaceae	Ferruginibacter	ASV64	28-42	4.56165e-05
153.367	-3.30458	0.836172	-3.95204	7.74875e-05	0.0004491	Bacteria	Proteobacteria	Alphaproteobacteria	Sphingomonadales	Sphingomonadaceae	unclassified	ASV119	28-42	0.000498708
28.7751	6.79695	1.83054	3.71309	0.000204744	0.00112336	Bacteria	Armatimonadetes	Fimbriimonadia	Fimbriimonadales	Fimbriimonadaceae	unclassified	ASV402	28-42	0.00122105
19.3339	37.5878	4.5632	8.23717	1.76332e-16	1.11632e-14	Bacteria	Planctomycetes	Planctomycetacia	Planctomycetales	Rubinisphaeraceae	Planctomicrobium	ASV511	28-42	7.63797e-15
4.03693	37.6866	4.58343	8.22235	1.99553e-16	1.17308e-14	Bacteria	Bacteroidetes	Bacteroidia	Chitinophagales	Chitinophagaceae	unclassified	ASV1062	28-42	8.53152e-15
4.56328	34.1795	4.59893	7.43205	1.06923e-13	3.32068e-12	Bacteria	Proteobacteria	Gammaproteobacteria	Pseudomonadales	Pseudomonadaceae	Pseudomonas	ASV1143	28-42	2.81593e-12
48.4318	-16.802	3.84882	-4.3655	1.26831e-05	8.31731e-05	Bacteria	Proteobacteria	Alphaproteobacteria	Acetobacterales	Acetobacteraceae	Gluconobacter	ASV205	28-42	9.30946e-05
4.93835	-33.9818	4.59817	-7.39028	1.46515e-13	4.23095e-12	Bacteria	Bacteroidetes	Bacteroidia	Flavobacteriales	Weeksellaceae	unclassified	ASV882	28-42	3.73898e-12
28.0042	-49.5163	3.62379	-13.6642	1.66055e-42	9.1109e-40	Bacteria	Bacteroidetes	Bacteroidia	Flavobacteriales	Flavobacteriaceae	Flavobacterium	ASV435	28-42	5.75425e-40
919.883	-1.35801	0.495595	-2.74016	0.00614087	0.0264853	Bacteria	Proteobacteria	Gammaproteobacteria	Betaproteobacteriales	Burkholderiaceae	Achromobacter	ASV18	28-42	0.0285937
33.0718	-8.69229	1.84118	-4.72104	2.34642e-06	1.69395e-05	Bacteria	Bacteroidetes	Bacteroidia	Flavobacteriales	Weeksellaceae	Chryseobacterium	ASV413	28-42	1.88861e-05
362.403	-2.18246	0.769508	-2.83617	0.00456584	0.0201484	Bacteria	Proteobacteria	Alphaproteobacteria	Rhizobiales	Rhizobiaceae	unclassified	ASV29	28-42	0.0218153
130.476	-3.20347	1.21273	-2.64155	0.00825282	0.0350107	Bacteria	Proteobacteria	Alphaproteobacteria	Acetobacterales	Acetobacteraceae	Gluconobacter	ASV123	28-42	0.0375253
54.3032	7.38616	1.71074	4.31752	1.57792e-05	0.000101455	Bacteria	Bacteroidetes	Bacteroidia	Flavobacteriales	Flavobacteriaceae	Flavobacterium	ASV259	28-42	0.00011404
50.3275	-8.79254	1.52228	-5.77591	7.65382e-09	7.54382e-08	Bacteria	Proteobacteria	Gammaproteobacteria	Pseudomonadales	Pseudomonadaceae	Pseudomonas	ASV296	28-42	8.48362e-08
154.648	3.62255	0.941188	3.84891	0.000118644	0.000668795	Bacteria	Bacteroidetes	Bacteroidia	Sphingobacteriales	Sphingobacteriaceae	Pedobacter	ASV115	28-42	0.000738329
2.90643	20.6748	4.60384	4.49076	7.09693e-06	4.76798e-05	Bacteria	Actinobacteria	Thermoleophilia	Gaiellales	Gaiellaceae	Gaiella	ASV1121	28-42	5.37083e-05
9.17683	-34.997	4.61559	-7.58236	3.39324e-14	1.2072e-12	Bacteria	Proteobacteria	Alphaproteobacteria	Rhizobiales	Rhizobiaceae	unclassified	ASV857	28-42	9.79872e-13
24.7011	6.77166	2.17275	3.11663	0.00182932	0.00870251	Bacteria	Verrucomicrobia	Verrucomicrobiae	Chthoniobacterales	Terrimicrobiaceae	Terrimicrobium	ASV462	28-42	0.00924349
13.1821	17.7429	3.52759	5.02976	4.91099e-07	3.67431e-06	Bacteria	Actinobacteria	Actinobacteria	Micrococcales	Microbacteriaceae	unclassified	ASV643	28-42	4.25447e-06
71.9002	-3.62503	1.26124	-2.87417	0.0040509	0.0183181	Bacteria	Proteobacteria	Alphaproteobacteria	Sphingomonadales	Sphingomonadaceae	Novosphingobium	ASV232	28-42	0.0195536
1.02772	33.0719	4.60085	7.18821	6.56462e-13	1.77137e-11	Bacteria	Proteobacteria	Gammaproteobacteria	Legionellales	Legionellaceae	Legionella	ASV1853	28-42	1.53813e-11
9.75298	17.6268	3.82315	4.61055	4.01605e-06	2.83709e-05	Bacteria	Bacteroidetes	Bacteroidia	Cytophagales	Microscillaceae	Chryseolinea	ASV698	28-42	3.16288e-05
52.8567	-5.99425	2.25244	-2.66123	0.00778562	0.0331998	Bacteria	Proteobacteria	Gammaproteobacteria	Betaproteobacteriales	Burkholderiaceae	Delftia	ASV284	28-42	0.0356223
6.06138	31.9903	4.61574	6.93069	4.18779e-12	9.70859e-11	Bacteria	Proteobacteria	Gammaproteobacteria	Betaproteobacteriales	Burkholderiaceae	unclassified	ASV940	28-42	8.80907e-11
48.1833	-11.395	4.46731	-2.55076	0.0107488	0.0450325	Bacteria	Proteobacteria	Gammaproteobacteria	Betaproteobacteriales	Burkholderiaceae	unclassified	ASV326	28-42	0.0476387
3.72991	38.2999	4.58268	8.35754	6.40383e-17	4.39196e-15	Bacteria	Proteobacteria	Deltaproteobacteria	Desulfuromonadales	Geobacteraceae	Geobacter	ASV1111	28-42	2.88787e-15
2.06642	28.8252	4.61748	6.24261	4.30325e-10	5.85384e-09	Bacteria	Proteobacteria	Alphaproteobacteria	Rhizobiales	A0839	unclassified	ASV1350	28-42	6.46862e-09
3.82978	-29.9821	4.61603	-6.49522	8.29143e-11	1.36477e-09	Bacteria	Bacteroidetes	Bacteroidia	Flavobacteriales	Flavobacteriaceae	Flavobacterium	ASV1074	28-42	1.41427e-09
0.3708	23.8033	4.62444	5.14728	2.64295e-07	2.0234e-06	Bacteria	Bacteroidetes	Bacteroidia	Chitinophagales	37-13	unclassified	ASV2908	28-42	2.35789e-06
5.12636	20.9423	4.61821	4.53472	5.76794e-06	3.95585e-05	Bacteria	Proteobacteria	Alphaproteobacteria	Rhizobiales	Beijerinckiaceae	28-YEA-48	ASV679	28-42	4.44457e-05
67.0758	10.2077	1.595	6.39983	1.55552e-10	2.41532e-09	Bacteria	Proteobacteria	Gammaproteobacteria	Pseudomonadales	Moraxellaceae	Cavicella	ASV226	28-42	2.554e-09
1.24374	-25.8948	4.61885	-5.60633	2.06666e-08	1.80943e-07	Bacteria	Firmicutes	Clostridia	Clostridiales	Family_XIII	Anaerovorax	ASV1857	28-42	2.08695e-07
146.164	-3.86635	0.850938	-4.54363	5.5293e-06	3.82404e-05	Bacteria	Proteobacteria	Alphaproteobacteria	Caulobacterales	Caulobacteraceae	Brevundimonas	ASV132	28-42	4.2779e-05
444.093	2.91727	0.900394	3.23999	0.00119534	0.00580393	Bacteria	Proteobacteria	Gammaproteobacteria	Betaproteobacteriales	Burkholderiaceae	unclassified	ASV49	28-42	0.00622145
37.5654	28.9329	4.63423	6.24331	4.28409e-10	5.85384e-09	Bacteria	Proteobacteria	Alphaproteobacteria	Caulobacterales	Hyphomonadaceae	Hirschia	ASV341	28-42	6.45457e-09
43.4929	-9.2922	3.04137	-3.05527	0.00224859	0.0105147	Bacteria	Proteobacteria	Gammaproteobacteria	Pseudomonadales	Pseudomonadaceae	Pseudomonas	ASV366	28-42	0.0111818
59.5169	24.8061	4.63545	5.35138	8.72856e-08	6.94068e-07	Bacteria	Proteobacteria	Alphaproteobacteria	Sphingomonadales	Sphingomonadaceae	Sphingorhabdus	ASV241	28-42	8.10562e-07
5.49431	-35.0393	4.50865	-7.77158	7.75101e-15	3.35741e-13	Bacteria	Verrucomicrobia	Verrucomicrobiae	Chthoniobacterales	Terrimicrobiaceae	Terrimicrobium	ASV917	28-42	2.52637e-13
3.77897	29.3116	4.61638	6.34948	2.1605e-10	3.17516e-09	Bacteria	Proteobacteria	Gammaproteobacteria	Xanthomonadales	Xanthomonadaceae	Pseudoxanthomonas	ASV1072	28-42	3.43592e-09
1.5914	21.4618	4.63764	4.62774	3.69683e-06	2.62284e-05	Bacteria	Planctomycetes	Planctomycetacia	Gemmatales	Gemmataceae	Gemmata	ASV1579	28-42	2.92196e-05
1.16005	28.0755	4.61822	6.07928	1.20726e-09	1.48294e-08	Bacteria	Firmicutes	Clostridia	Clostridiales	Lachnospiraceae	unclassified	ASV1734	28-42	1.62881e-08
438.822	-2.0565	0.650446	-3.16167	0.00156868	0.00752786	Bacteria	Proteobacteria	Gammaproteobacteria	Enterobacteriales	Enterobacteriaceae	unclassified	ASV51	28-42	0.00805633
1.20612	23.4895	4.61803	5.08647	3.64795e-07	2.75762e-06	Bacteria	Proteobacteria	Deltaproteobacteria	Bdellovibrionales	Bacteriovoracaceae	unclassified	ASV1709	28-42	3.19766e-06
1.96691	34.4663	4.59985	7.49292	6.73588e-14	2.19971e-12	Bacteria	Proteobacteria	Deltaproteobacteria	Bdellovibrionales	Bdellovibrionaceae	Bdellovibrio	ASV1419	28-42	1.90339e-12
23.4399	-11.1006	4.05153	-2.73985	0.00614665	0.0264853	Bacteria	Bacteroidetes	Bacteroidia	Chitinophagales	Chitinophagaceae	Taibaiella	ASV497	28-42	0.0286004
66.9458	-3.26243	1.28132	-2.54615	0.0108917	0.0453867	Bacteria	Proteobacteria	Alphaproteobacteria	Caulobacterales	Caulobacteraceae	Brevundimonas	ASV257	28-42	0.0481606
22.971	8.19424	2.09468	3.91193	9.15606e-05	0.000525118	Bacteria	Proteobacteria	Alphaproteobacteria	Rhizobiales	Devosiaceae	Devosia	ASV463	28-42	0.000579649
15.2744	-32.9122	4.63381	-7.10262	1.22414e-12	2.96313e-11	Bacteria	Firmicutes	Clostridia	Clostridiales	Lachnospiraceae	Anaerocolumna	ASV677	28-42	2.71371e-11
133.738	-3.20162	0.988596	-3.23856	0.00120136	0.005816	Bacteria	Bacteroidetes	Bacteroidia	Chitinophagales	Chitinophagaceae	unclassified	ASV133	28-42	0.00624783
20.2293	-18.8439	4.61592	-4.08237	4.45791e-05	0.000268781	Bacteria	Proteobacteria	Alphaproteobacteria	Rhizobiales	Beijerinckiaceae	Bosea	ASV313	28-42	0.000299194
3.79227	26.5958	4.63562	5.73726	9.62213e-09	9.15493e-08	Bacteria	Proteobacteria	Alphaproteobacteria	Rhizobiales	Xanthobacteraceae	Azorhizobium	ASV1094	28-42	1.03686e-07
0.928396	26.7848	4.6187	5.7992	6.66338e-09	6.68776e-08	Bacteria	Proteobacteria	Gammaproteobacteria	unclassified	unclassified	unclassified	ASV1823	28-42	7.49943e-08
212.261	-2.88016	0.526717	-5.46813	4.54818e-08	3.68783e-07	Bacteria	Proteobacteria	Alphaproteobacteria	Caulobacterales	Caulobacteraceae	Brevundimonas	ASV96	28-42	4.3525e-07
0.939023	26.4382	4.6186	5.72429	1.03867e-08	9.76942e-08	Bacteria	Proteobacteria	Alphaproteobacteria	Rhodobacterales	Rhodobacteraceae	unclassified	ASV1926	28-42	1.11378e-07
21.3903	8.24453	2.14897	3.83651	0.000124796	0.000701072	Bacteria	Bacteroidetes	Bacteroidia	Chitinophagales	Chitinophagaceae	unclassified	ASV494	28-42	0.000773688
10.7359	30.0124	4.63451	6.47586	9.42748e-11	1.52134e-09	Bacteria	Bacteroidetes	Bacteroidia	Flavobacteriales	Flavobacteriaceae	Flavobacterium	ASV699	28-42	1.58343e-09
131.725	-11.2812	2.89013	-3.90335	9.48713e-05	0.00054034	Bacteria	Proteobacteria	Gammaproteobacteria	Enterobacteriales	Enterobacteriaceae	unclassified	ASV160	28-42	0.000598881
2.34191	29.7687	4.61682	6.44788	1.13424e-10	1.79515e-09	Bacteria	Verrucomicrobia	Verrucomicrobiae	Verrucomicrobiales	Verrucomicrobiaceae	Verrucomicrobium	ASV1389	28-42	1.89539e-09
32.8127	6.60005	2.0907	3.15686	0.00159479	0.0076309	Bacteria	Patescibacteria	Gracilibacteria	Absconditabacteriales_(SR1)	unclassified	unclassified	ASV364	28-42	0.0081713
0.364803	26.5737	4.62634	5.74399	9.24688e-09	8.9008e-08	Bacteria	Acidobacteria	Acidobacteriia	Acidobacteriales	Acidobacteriaceae_(Subgroup_1)	Edaphobacter	ASV3129	28-42	1.0063e-07
0.687931	25.9175	4.62062	5.60911	2.03375e-08	1.79013e-07	Bacteria	Proteobacteria	Alphaproteobacteria	Rhizobiales	Xanthobacteraceae	Pseudorhodoplanes	ASV2342	28-42	2.05686e-07
25.7573	-8.90183	2.25002	-3.95633	7.61095e-05	0.000442672	Bacteria	Proteobacteria	Gammaproteobacteria	Pseudomonadales	Moraxellaceae	Acinetobacter	ASV445	28-42	0.000490798
0.4801	25.9626	4.63762	5.59827	2.165e-08	1.8855e-07	Bacteria	Bacteroidetes	Bacteroidia	Chitinophagales	Chitinophagaceae	Parafilimonas	ASV2520	28-42	2.17624e-07
1.09481	17.9373	4.61958	3.88289	0.000103224	0.000583873	Bacteria	Bacteroidetes	Bacteroidia	Sphingobacteriales	Sphingobacteriaceae	unclassified	ASV1514	28-42	0.000648501
1.80261	28.9286	4.59969	6.28926	3.18983e-10	4.56561e-09	Bacteria	Actinobacteria	Actinobacteria	Frankiales	Nakamurellaceae	Nakamurella	ASV1437	28-42	4.96497e-09
28.0529	-6.26981	2.0965	-2.99061	0.00278419	0.0129092	Bacteria	Bacteroidetes	Bacteroidia	Flavobacteriales	Weeksellaceae	Empedobacter	ASV458	28-42	0.0137209
3.31124	37.6839	4.58154	8.22516	1.94927e-16	1.17308e-14	Bacteria	Bacteroidetes	Bacteroidia	Cytophagales	Cytophagaceae	Cytophaga	ASV1257	28-42	8.38823e-15
3.17381	26.3006	4.63529	5.674	1.395e-08	1.28278e-07	Bacteria	Proteobacteria	Alphaproteobacteria	Rhizobiales	Rhizobiaceae	unclassified	ASV1218	28-42	1.46253e-07
5.31167	-27.0561	4.45485	-6.07341	1.25222e-09	1.51555e-08	Bacteria	Proteobacteria	Alphaproteobacteria	Acetobacterales	Acetobacteraceae	unclassified	ASV997	28-42	1.6797e-08
9.72028	29.0913	4.06168	7.16238	7.92905e-13	2.03925e-11	Bacteria	Verrucomicrobia	Verrucomicrobiae	Verrucomicrobiales	Verrucomicrobiaceae	Prosthecobacter	ASV728	28-42	1.8132e-11
3.24057	-29.396	4.61639	-6.36775	1.91823e-10	3.72253e-09	Bacteria	Proteobacteria	Gammaproteobacteria	Xanthomonadales	Xanthomonadaceae	Pseudoxanthomonas	ASV1177	42-91	3.07947e-09
1.30229	-19.482	4.61834	-4.21839	2.46048e-05	0.000202497	Bacteria	Actinobacteria	Acidimicrobiia	Microtrichales	Ilumatobacteraceae	unclassified	ASV1473	42-91	0.000172522
3.55771	25.7614	4.63617	5.55662	2.7505e-08	3.01821e-07	Bacteria	Verrucomicrobia	Verrucomicrobiae	Verrucomicrobiales	Rubritaleaceae	unclassified	ASV1261	42-91	2.7273e-07
0.917814	-27.2249	4.62111	-5.89141	3.82912e-09	5.11149e-08	Bacteria	Firmicutes	Bacilli	Bacillales	Paenibacillaceae	unclassified	ASV1963	42-91	4.51809e-08
0.435874	-25.8034	4.62496	-5.57915	2.41693e-08	2.68802e-07	Bacteria	Proteobacteria	Gammaproteobacteria	unclassified	unclassified	unclassified	ASV3100	42-91	2.41473e-07
1.87242	-19.5518	4.62085	-4.23121	2.32441e-05	0.00019226	Bacteria	Actinobacteria	Actinobacteria	Micrococcales	Microbacteriaceae	Leucobacter	ASV1156	42-91	0.000163503
7.70862	43.422	3.40046	12.7694	2.42941e-37	5.7126e-35	Bacteria	Proteobacteria	unclassified	unclassified	unclassified	unclassified	ASV835	42-91	6.66469e-35
4.7738	-38.6206	4.58142	-8.42984	3.46135e-17	2.27896e-15	Bacteria	Bacteroidetes	Bacteroidia	Chitinophagales	Chitinophagaceae	unclassified	ASV970	42-91	1.63954e-15
1.31932	27.3637	4.63864	5.89908	3.65544e-09	4.97261e-08	Bacteria	Bacteroidetes	Bacteroidia	Chitinophagales	Chitinophagaceae	unclassified	ASV1647	42-91	4.3443e-08
32.8424	-5.90975	1.97552	-2.99149	0.00277619	0.0159777	Bacteria	Firmicutes	Bacilli	Bacillales	Paenibacillaceae	Paenibacillus	ASV386	42-91	0.0136917
20.8807	-11.7174	4.54399	-2.57866	0.00991838	0.0510177	Bacteria	Proteobacteria	Gammaproteobacteria	Betaproteobacteriales	Burkholderiaceae	Rhodoferax	ASV485	42-91	0.0443331
3.4188	-30.8974	4.61624	-6.69321	2.18335e-11	4.85647e-10	Bacteria	Bacteroidetes	Bacteroidia	Chitinophagales	Chitinophagaceae	unclassified	ASV1093	42-91	4.11895e-10
2.02423	-29.0973	4.63263	-6.28095	3.36512e-10	6.22359e-09	Bacteria	Proteobacteria	Gammaproteobacteria	Betaproteobacteriales	Burkholderiaceae	Burkholderia-Caballeronia-Paraburkholderia	ASV1421	42-91	5.20093e-09
0.663806	-16.0844	4.63461	-3.4705	0.000519486	0.00336643	Bacteria	Proteobacteria	Alphaproteobacteria	Rhodobacterales	Rhodobacteraceae	unclassified	ASV1950	42-91	0.00288876
108.99	2.3985	0.759209	3.15921	0.00158197	0.00946884	Bacteria	Bacteroidetes	Bacteroidia	Chitinophagales	Chitinophagaceae	unclassified	ASV161	42-91	0.00811644
95.9359	4.57807	1.15451	3.96537	7.32815e-05	0.000545798	Bacteria	Verrucomicrobia	Verrucomicrobiae	Verrucomicrobiales	Verrucomicrobiaceae	Prosthecobacter	ASV175	42-91	0.000475355
3.35069	34.7334	4.49299	7.73056	1.07072e-14	4.29855e-13	Bacteria	Proteobacteria	unclassified	unclassified	unclassified	unclassified	ASV1151	42-91	3.37303e-13
82.7657	7.78057	2.04111	3.81194	0.000137883	0.000953591	Bacteria	Bacteroidetes	Bacteroidia	Flavobacteriales	Flavobacteriaceae	Flavobacterium	ASV194	42-91	0.000842914
666.591	7.90472	1.22603	6.4474	1.13787e-10	2.31226e-09	Bacteria	Proteobacteria	Gammaproteobacteria	Betaproteobacteriales	Burkholderiaceae	unclassified	ASV33	42-91	1.89664e-09
266.041	2.06424	0.569275	3.62608	0.000287758	0.00194119	Bacteria	Proteobacteria	Deltaproteobacteria	Oligoflexales	Oligoflexaceae	Oligoflexus	ASV78	42-91	0.00167367
4578.44	4.14779	0.754324	5.49868	3.82652e-08	4.14372e-07	Bacteria	Bacteroidetes	Bacteroidia	Chitinophagales	unclassified	unclassified	ASV1	42-91	3.70378e-07
1095.5	4.44883	1.03089	4.31553	1.5922e-05	0.000137212	Bacteria	Bacteroidetes	Bacteroidia	Chitinophagales	unclassified	unclassified	ASV17	42-91	0.000114945
21.8672	8.86292	2.58649	3.42662	0.00061115	0.00394491	Bacteria	Proteobacteria	Gammaproteobacteria	Xanthomonadales	Rhodanobacteraceae	Dokdonella	ASV440	42-91	0.00335038
0.674725	-15.5279	4.63495	-3.35017	0.000807609	0.0050932	Bacteria	Actinobacteria	Acidimicrobiia	IMCC26256	unclassified	unclassified	ASV1877	42-91	0.00433005
1.02889	-19.6228	4.61779	-4.24939	2.14353e-05	0.000180013	Bacteria	Actinobacteria	Acidimicrobiia	Microtrichales	unclassified	unclassified	ASV1810	42-91	0.000152244
61.4525	-6.56295	1.42424	-4.60803	4.06507e-06	3.75905e-05	Bacteria	Firmicutes	Clostridia	Clostridiales	Clostridiaceae_1	Clostridium_sensu_stricto_3	ASV277	42-91	3.19766e-05
3.98408	26.0696	4.61572	5.648	1.62321e-08	1.88155e-07	Bacteria	Proteobacteria	Alphaproteobacteria	Rhizobiales	Xanthobacteraceae	Tardiphaga	ASV961	42-91	1.67511e-07
26.6178	6.19302	2.20771	2.80518	0.00502886	0.0279645	Bacteria	Bacteroidetes	Bacteroidia	Chitinophagales	Chitinophagaceae	unclassified	ASV476	42-91	0.0238201
10.6988	28.0676	4.63506	6.05549	1.39987e-09	2.14038e-08	Bacteria	Actinobacteria	Actinobacteria	Micrococcales	Microbacteriaceae	Curtobacterium	ASV725	42-91	1.84705e-08
10.009	-10.4329	3.91881	-2.66228	0.00776139	0.0414073	Bacteria	Proteobacteria	Alphaproteobacteria	Caulobacterales	Caulobacteraceae	Caulobacter	ASV703	42-91	0.0355856
4.02651	-28.7606	4.62712	-6.21564	5.11147e-10	9.04676e-09	Bacteria	Bacteroidetes	Bacteroidia	Bacteroidales	Dysgonomonadaceae	Dysgonomonas	ASV1040	42-91	7.61402e-09
2.01472	-20.3611	4.61692	-4.4101	1.03324e-05	9.29353e-05	Bacteria	Firmicutes	Bacilli	Bacillales	Paenibacillaceae	Paenibacillus	ASV1229	42-91	7.68686e-05
1085.92	-2.50567	0.570427	-4.39262	1.11994e-05	0.000100186	Bacteria	Proteobacteria	Gammaproteobacteria	Pseudomonadales	Pseudomonadaceae	Pseudomonas	ASV10	42-91	8.2944e-05
2.0312	-24.2895	4.61616	-5.26183	1.42625e-07	1.44025e-06	Bacteria	Bacteroidetes	Bacteroidia	Chitinophagales	Chitinophagaceae	unclassified	ASV1357	42-91	1.29345e-06
13.5569	10.3703	3.22267	3.21794	0.00129117	0.00781345	Bacteria	Actinobacteria	Actinobacteria	Micrococcales	Microbacteriaceae	unclassified	ASV693	42-91	0.00668846
7.5878	32.7374	4.61562	7.09275	1.3147e-12	3.73104e-11	Bacteria	Proteobacteria	Gammaproteobacteria	Enterobacteriales	Enterobacteriaceae	unclassified	ASV847	42-91	2.89499e-11
0.49372	-26.0841	4.62179	-5.64371	1.66423e-08	1.91561e-07	Bacteria	Proteobacteria	Alphaproteobacteria	Rhizobiales	Beijerinckiaceae	unclassified	ASV2591	42-91	1.70941e-07
3.11585	40.7789	4.61609	8.83407	1.00935e-18	7.5518e-17	Bacteria	Proteobacteria	Alphaproteobacteria	Rhizobiales	Stappiaceae	Agaricicola	ASV1213	42-91	5.93356e-17
6.3315	29.2139	4.63475	6.30323	2.91514e-10	5.45264e-09	Bacteria	Bacteroidetes	Bacteroidia	Sphingobacteriales	Sphingobacteriaceae	unclassified	ASV943	42-91	4.55898e-09
19.9685	7.33705	2.75968	2.65866	0.00784531	0.0416561	Bacteria	Bacteroidetes	Bacteroidia	Sphingobacteriales	Sphingobacteriaceae	Mucilaginibacter	ASV506	42-91	0.0358456
0.984301	-18.3953	4.6024	-3.9969	6.41763e-05	0.000489047	Bacteria	Proteobacteria	Alphaproteobacteria	Rhizobiales	Beijerinckiaceae	Microvirga	ASV1773	42-91	0.000420017
1.50927	-19.1668	4.6	-4.16669	3.09054e-05	0.000248148	Bacteria	Proteobacteria	Alphaproteobacteria	unclassified	unclassified	unclassified	ASV1460	42-91	0.000213069
7.14914	30.4162	4.59808	6.61497	3.7162e-11	7.94398e-10	Bacteria	Bacteroidetes	Bacteroidia	Flavobacteriales	Flavobacteriaceae	Flavobacterium	ASV858	42-91	6.79652e-10
0.876363	27.5952	4.63614	5.95218	2.64595e-09	3.75451e-08	Bacteria	Proteobacteria	Alphaproteobacteria	Rhodospirillales	unclassified	unclassified	ASV2022	42-91	3.22609e-08
1.39941	-20.3059	4.63652	-4.37957	1.18916e-05	0.000104987	Bacteria	Proteobacteria	Alphaproteobacteria	Acetobacterales	Acetobacteraceae	Roseomonas	ASV1660	42-91	8.76756e-05
24.7415	-8.79835	2.28964	-3.84268	0.000121696	0.000859706	Bacteria	Bacteroidetes	Bacteroidia	Chitinophagales	Chitinophagaceae	Taibaiella	ASV448	42-91	0.000755892
1.71188	26.9067	4.63695	5.80266	6.52702e-09	8.39333e-08	Bacteria	Proteobacteria	Gammaproteobacteria	Legionellales	Legionellaceae	Legionella	ASV1537	42-91	7.35854e-08
15.0162	29.0371	4.63481	6.26501	3.72811e-10	6.81831e-09	Bacteria	Bacteroidetes	Bacteroidia	Chitinophagales	Chitinophagaceae	unclassified	ASV603	42-91	5.68099e-09
10.3118	-31.8906	4.61558	-6.90933	4.86944e-12	1.25236e-10	Bacteria	Proteobacteria	Gammaproteobacteria	Betaproteobacteriales	Burkholderiaceae	unclassified	ASV788	42-91	1.00503e-10
8.70417	33.9797	3.72836	9.11383	7.95214e-20	6.54461e-18	Bacteria	Bacteroidetes	Bacteroidia	Cytophagales	Spirosomaceae	Leadbetterella	ASV777	42-91	5.23569e-18
65.1258	14.13	4.54393	3.10965	0.00187311	0.0110507	Bacteria	Proteobacteria	Gammaproteobacteria	Betaproteobacteriales	Burkholderiaceae	Curvibacter	ASV231	42-91	0.00944299
2.63695	31.4135	4.63447	6.77825	1.21643e-11	2.86035e-10	Bacteria	Proteobacteria	Gammaproteobacteria	Xanthomonadales	Xanthomonadaceae	Xanthomonas	ASV1349	42-91	2.3979e-10
0.969759	18.5384	4.61811	4.01428	5.96279e-05	0.0004565	Bacteria	Planctomycetes	Planctomycetacia	Planctomycetales	Rubinisphaeraceae	SH-PL14	ASV1790	42-91	0.000392983
4.62699	21.4513	4.61605	4.64711	3.36614e-06	3.13032e-05	Bacteria	Proteobacteria	Gammaproteobacteria	Xanthomonadales	Rhodanobacteraceae	Dokdonella	ASV989	42-91	2.6702e-05
0.229946	-17.5593	4.62628	-3.79554	0.00014732	0.00101037	Bacteria	Chloroflexi	JG30-KF-CM66	unclassified	unclassified	unclassified	ASV3231	42-91	0.000894792
0.863974	19.3351	4.61792	4.18698	2.82694e-05	0.000228566	Bacteria	Proteobacteria	Alphaproteobacteria	Rhizobiales	Devosiaceae	unclassified	ASV1841	42-91	0.000196335
18.7877	31.3003	4.63438	6.75394	1.4388e-11	3.33558e-10	Bacteria	Proteobacteria	Gammaproteobacteria	Betaproteobacteriales	Burkholderiaceae	unclassified	ASV540	42-91	2.80268e-10
0.993369	-18.3988	4.62158	-3.98105	6.86102e-05	0.000518038	Bacteria	Proteobacteria	Alphaproteobacteria	Sphingomonadales	Sphingomonadaceae	Altererythrobacter	ASV1547	42-91	0.000448144
26.3498	-12.7776	4.54538	-2.81112	0.00493689	0.0276399	Bacteria	Verrucomicrobia	Verrucomicrobiae	Chthoniobacterales	Chthoniobacteraceae	Chthoniobacter	ASV433	42-91	0.0234351
0.603059	-17.7558	4.61902	-3.84407	0.000121012	0.000858558	Bacteria	Fibrobacteres	Fibrobacteria	Fibrobacterales	Fibrobacteraceae	possible_genus_04	ASV1973	42-91	0.000752353
4.48414	-24.0996	4.03137	-5.97803	2.25858e-09	3.26108e-08	Bacteria	Firmicutes	Bacilli	Bacillales	Paenibacillaceae	Paenibacillus	ASV947	42-91	2.80047e-08
3.71823	-13.8283	4.63515	-2.98336	0.00285101	0.0162943	Bacteria	Proteobacteria	Alphaproteobacteria	Rhodobacterales	Rhodobacteraceae	unclassified	ASV758	42-91	0.0140082
57.5899	29.2127	3.97031	7.35778	1.86996e-13	6.41239e-12	Bacteria	Proteobacteria	Alphaproteobacteria	Acetobacterales	Acetobacteraceae	unclassified	ASV268	42-91	4.68129e-12
2.81315	30.9548	4.61721	6.70422	2.02486e-11	4.56564e-10	Bacteria	Bacteroidetes	Bacteroidia	Flavobacteriales	Flavobacteriaceae	Flavobacterium	ASV1367	42-91	3.83094e-10
50.6581	9.31048	1.63516	5.69393	1.24146e-08	1.48076e-07	Bacteria	Verrucomicrobia	Verrucomicrobiae	Verrucomicrobiales	Rubritaleaceae	unclassified	ASV297	42-91	1.31623e-07
2.63212	-19.8905	4.59916	-4.32481	1.52666e-05	0.000132257	Bacteria	Actinobacteria	Thermoleophilia	Solirubrobacterales	Solirubrobacteraceae	Solirubrobacter	ASV1192	42-91	0.000110822
3.96382	36.1753	3.92218	9.22325	2.8824e-20	2.49707e-18	Bacteria	Proteobacteria	Alphaproteobacteria	Micavibrionales	unclassified	unclassified	ASV1135	42-91	2.01523e-18
7.21617	-12.9791	3.9243	-3.30738	0.000941739	0.00591642	Bacteria	Gemmatimonadetes	Gemmatimonadetes	Gemmatimonadales	Gemmatimonadaceae	unclassified	ASV785	42-91	0.00500033
6.7361	34.1211	4.17925	8.16441	3.22998e-16	1.83329e-14	Bacteria	Verrucomicrobia	Verrucomicrobiae	Opitutales	Opitutaceae	IMCC26134	ASV885	42-91	1.34596e-14
18.8045	-11.8823	4.54432	-2.61476	0.00892908	0.046658	Bacteria	Firmicutes	Bacilli	Bacillales	Paenibacillaceae	Paenibacillus	ASV518	42-91	0.0402941
0.969253	28.6161	4.62034	6.19351	5.88397e-10	1.01948e-08	Bacteria	Firmicutes	Clostridia	Clostridiales	Lachnospiraceae	unclassified	ASV2021	42-91	8.64734e-09
15.6368	22.4624	4.6344	4.84688	1.2542e-06	1.20024e-05	Bacteria	Bacteroidetes	Bacteroidia	Sphingobacteriales	Sphingobacteriaceae	unclassified	ASV645	42-91	1.04132e-05
1.62488	-13.9656	4.63619	-3.0123	0.0025928	0.0149745	Bacteria	Bacteroidetes	Bacteroidia	Cytophagales	Spirosomaceae	Persicitalea	ASV1269	42-91	0.0128257
14.1119	17.4966	4.63808	3.77238	0.000161699	0.00110438	Bacteria	Proteobacteria	Alphaproteobacteria	Acetobacterales	Acetobacteraceae	Komagataeibacter	ASV468	42-91	0.000973401
8.78223	26.6727	4.63413	5.75572	8.62736e-09	1.08402e-07	Bacteria	Verrucomicrobia	Verrucomicrobiae	Verrucomicrobiales	Rubritaleaceae	Luteolibacter	ASV754	42-91	9.4829e-08
6.57201	37.3424	4.61807	8.08616	6.15746e-16	3.16724e-14	Bacteria	Bacteroidetes	Bacteroidia	Sphingobacteriales	Sphingobacteriaceae	unclassified	ASV901	42-91	2.38475e-14
17.2795	-11.644	4.54393	-2.56254	0.010391	0.0529525	Bacteria	Acidobacteria	Acidobacteriia	Solibacterales	Solibacteraceae_(Subgroup_3)	Bryobacter	ASV521	42-91	0.0461949
12.2204	-44.3808	4.30742	-10.3033	6.80641e-25	9.33612e-23	Bacteria	Firmicutes	Bacilli	Bacillales	Paenibacillaceae	Paenibacillus	ASV648	42-91	7.4689e-23
94.1279	8.99767	1.26849	7.09322	1.31028e-12	3.73104e-11	Bacteria	Bacteroidetes	Bacteroidia	Flavobacteriales	Flavobacteriaceae	Flavobacterium	ASV176	42-91	2.89492e-11
53.5328	7.12823	1.7687	4.03021	5.5726e-05	0.000432665	Bacteria	Bacteroidetes	Bacteroidia	Chitinophagales	Chitinophagaceae	unclassified	ASV292	42-91	0.000368744
2.18568	-29.4897	4.61728	-6.38682	1.69371e-10	3.35884e-09	Bacteria	Bacteroidetes	Bacteroidia	Chitinophagales	Chitinophagaceae	Filimonas	ASV1420	42-91	2.76709e-09
1.14148	19.0084	4.61735	4.11674	3.84275e-05	0.000305564	Bacteria	Actinobacteria	Actinobacteria	Corynebacteriales	Mycobacteriaceae	Mycobacterium	ASV1454	42-91	0.000261101
8.98215	-16.9332	4.2732	-3.96264	7.41247e-05	0.000549591	Bacteria	Bacteroidetes	Bacteroidia	Chitinophagales	Chitinophagaceae	Taibaiella	ASV724	42-91	0.000480352
109.802	-5.98383	1.5678	-3.81671	0.000135244	0.000939291	Bacteria	Proteobacteria	Gammaproteobacteria	Pseudomonadales	Pseudomonadaceae	Pseudomonas	ASV118	42-91	0.000827554
18.9688	12.1562	4.54482	2.67473	0.00747889	0.0403615	Bacteria	Proteobacteria	Gammaproteobacteria	Pseudomonadales	Moraxellaceae	Cavicella	ASV526	42-91	0.0343622
0.650325	-18.2972	4.62178	-3.95891	7.52929e-05	0.000553268	Bacteria	Proteobacteria	Gammaproteobacteria	CCD24	unclassified	unclassified	ASV1912	42-91	0.000486485
22.7987	-19.8892	3.38227	-5.88043	4.092e-09	5.38834e-08	Bacteria	Bacteroidetes	Bacteroidia	Sphingobacteriales	Sphingobacteriaceae	Sphingobacterium	ASV451	42-91	4.7769e-08
3.6771	-19.7615	4.61802	-4.27922	1.87549e-05	0.000159915	Bacteria	Firmicutes	Erysipelotrichia	Erysipelotrichales	Erysipelotrichaceae	Turicibacter	ASV893	42-91	0.000134366
0.798543	18.1584	4.62164	3.92899	8.53042e-05	0.000621287	Bacteria	Fibrobacteres	Fibrobacteria	Fibrobacterales	possible_family_01	unclassified	ASV1694	42-91	0.000546345
3.30907	26.6092	4.63649	5.73908	9.51899e-09	1.17806e-07	Bacteria	Proteobacteria	Alphaproteobacteria	Sphingomonadales	Sphingomonadaceae	Sphingobium	ASV1313	42-91	1.03081e-07
30.1162	5.39568	2.12973	2.53351	0.0112927	0.057018	Bacteria	Proteobacteria	Alphaproteobacteria	Rhodobacterales	Rhodobacteraceae	unclassified	ASV425	42-91	0.0497002
15.4737	-11.6487	4.54568	-2.56259	0.0103894	0.0529525	Bacteria	Bacteroidetes	Bacteroidia	Chitinophagales	Chitinophagaceae	Ferruginibacter	ASV572	42-91	0.0461949
1.528	23.1633	4.61659	5.0174	5.23752e-07	5.07115e-06	Bacteria	Firmicutes	Bacilli	Bacillales	unclassified	unclassified	ASV1461	42-91	4.50769e-06
36.6747	-17.9394	4.63423	-3.87106	0.000108364	0.000772153	Bacteria	Proteobacteria	Alphaproteobacteria	Sphingomonadales	Sphingomonadaceae	Novosphingobium	ASV224	42-91	0.000678202
7.2897	28.2507	4.63535	6.09463	1.09692e-09	1.75294e-08	Bacteria	Proteobacteria	Gammaproteobacteria	Xanthomonadales	Xanthomonadaceae	SN8	ASV867	42-91	1.4891e-08
47.6001	28.0133	4.63393	6.04525	1.49179e-09	2.25274e-08	Bacteria	Bacteroidetes	Bacteroidia	Sphingobacteriales	Sphingobacteriaceae	Pedobacter	ASV327	42-91	1.9488e-08
0.874822	-23.1205	4.60205	-5.02396	5.06164e-07	4.92986e-06	Bacteria	Proteobacteria	Alphaproteobacteria	Micropepsales	Micropepsaceae	unclassified	ASV1778	42-91	4.37922e-06
4.47985	-19.9918	4.5999	-4.34614	1.38556e-05	0.000120668	Bacteria	Actinobacteria	Thermoleophilia	Solirubrobacterales	67-14	unclassified	ASV815	42-91	0.000101249
28.4257	-12.2791	4.54591	-2.70113	0.00691042	0.0375398	Bacteria	Proteobacteria	Gammaproteobacteria	unclassified	unclassified	unclassified	ASV403	42-91	0.0319286
142.088	6.54649	1.63018	4.0158	5.92442e-05	0.000455682	Bacteria	Bacteroidetes	Bacteroidia	Flavobacteriales	Weeksellaceae	Chryseobacterium	ASV127	42-91	0.000390845
133.419	-3.27548	1.16372	-2.81466	0.00488282	0.0274305	Bacteria	Proteobacteria	Alphaproteobacteria	Sphingomonadales	Sphingomonadaceae	Novosphingobium	ASV117	42-91	0.0232119
608.279	-4.92986	1.17549	-4.19386	2.74242e-05	0.000223466	Bacteria	Proteobacteria	Gammaproteobacteria	Pseudomonadales	Moraxellaceae	Acinetobacter	ASV40	42-91	0.000190868
0.881373	28.4018	4.62059	6.1468	7.90616e-10	1.3145e-08	Bacteria	Proteobacteria	Gammaproteobacteria	Legionellales	Legionellaceae	Legionella	ASV2073	42-91	1.12428e-08
851.895	8.46618	1.15716	7.31635	2.54811e-13	8.2239e-12	Bacteria	Proteobacteria	Gammaproteobacteria	Xanthomonadales	Rhodanobacteraceae	Frateuria	ASV24	42-91	6.23671e-12
2.80996	36.6724	4.59854	7.97479	1.5264e-15	7.17843e-14	Bacteria	Proteobacteria	Alphaproteobacteria	Sphingomonadales	Sphingomonadaceae	unclassified	ASV1256	42-91	5.46185e-14
117.882	5.05723	1.08413	4.66478	3.08952e-06	2.8894e-05	Bacteria	Proteobacteria	Alphaproteobacteria	Rhizobiales	Rhizobiaceae	unclassified	ASV151	42-91	2.46264e-05
2.12796	18.3386	4.62084	3.96868	7.22727e-05	0.0005432	Bacteria	Bacteroidetes	Bacteroidia	Bacteroidales	Dysgonomonadaceae	Dysgonomonas	ASV1128	42-91	0.000470201
84.5329	5.91408	1.8868	3.13445	0.00172178	0.0102312	Bacteria	Proteobacteria	Alphaproteobacteria	Rhizobiales	Devosiaceae	Devosia	ASV142	42-91	0.0087606
1.41129	33.2478	4.6098	7.21242	5.4967e-13	1.67548e-11	Bacteria	Bacteroidetes	Bacteroidia	Chitinophagales	Chitinophagaceae	Taibaiella	ASV1587	42-91	1.29251e-11
4.54967	27.629	4.62976	5.9677	2.40622e-09	3.44404e-08	Bacteria	Proteobacteria	Alphaproteobacteria	Rhodobacterales	Rhodobacteraceae	unclassified	ASV973	42-91	2.96677e-08
135.975	15.6217	4.63381	3.37125	0.000748276	0.00473717	Bacteria	Proteobacteria	Gammaproteobacteria	Xanthomonadales	Xanthomonadaceae	unclassified	ASV65	42-91	0.00402504
27.8751	-33.1709	4.31434	-7.68851	1.48855e-14	5.8337e-13	Bacteria	Proteobacteria	Alphaproteobacteria	Rhizobiales	Rhizobiaceae	unclassified	ASV432	42-91	4.60123e-13
4.06573	27.3347	4.63549	5.89683	3.70544e-09	4.99931e-08	Bacteria	Bacteroidetes	Bacteroidia	Cytophagales	Spirosomaceae	Leadbetterella	ASV1196	42-91	4.38789e-08
6.69736	35.4467	4.61584	7.67935	1.59894e-14	6.1206e-13	Bacteria	Spirochaetes	Spirochaetia	Spirochaetales	Spirochaetaceae	Spirochaeta_2	ASV794	42-91	4.89648e-13
0.874043	29.4202	4.62043	6.36742	1.92233e-10	3.72253e-09	Bacteria	Armatimonadetes	Fimbriimonadia	Fimbriimonadales	Fimbriimonadaceae	unclassified	ASV2330	42-91	3.07947e-09
520.411	38.6685	2.01679	19.1733	6.18433e-82	5.08971e-79	Bacteria	Bacteroidetes	Bacteroidia	Chitinophagales	unclassified	unclassified	ASV43	42-91	1.01794e-78
12.9889	37.9501	4.63511	8.18752	2.66655e-16	1.56755e-14	Bacteria	Bacteroidetes	Bacteroidia	Sphingobacteriales	Sphingobacteriaceae	Mucilaginibacter	ASV646	42-91	1.11825e-14
0.417577	-18.3315	4.62166	-3.96643	7.29583e-05	0.000545798	Bacteria	Firmicutes	Clostridia	Clostridiales	Ruminococcaceae	unclassified	ASV2400	42-91	0.000473726
3.34957	25.9156	4.63589	5.59022	2.26788e-08	2.5394e-07	Bacteria	Proteobacteria	Alphaproteobacteria	Sphingomonadales	Sphingomonadaceae	unclassified	ASV1220	42-91	2.27271e-07
461.322	4.55994	1.33913	3.40516	0.000661261	0.00423703	Bacteria	Bacteroidetes	Bacteroidia	Sphingobacteriales	Sphingobacteriaceae	Sphingobacterium	ASV19	42-91	0.00360691
3.74088	-20.2158	4.61662	-4.37891	1.19275e-05	0.000104987	Bacteria	Actinobacteria	Actinobacteria	Streptosporangiales	Thermomonosporaceae	Actinomadura	ASV932	42-91	8.78417e-05
0.436288	18.1872	4.63611	3.92295	8.74713e-05	0.000628724	Bacteria	Firmicutes	Clostridia	Clostridiales	Ruminococcaceae	Ruminococcaceae_NK4A214_group	ASV2230	42-91	0.000557513
45.7074	7.78315	1.62511	4.78931	1.67356e-06	1.5923e-05	Bacteria	Bacteroidetes	Bacteroidia	Flavobacteriales	Flavobacteriaceae	Flavobacterium	ASV335	42-91	1.37049e-05
2.51449	-25.9058	4.59825	-5.63383	1.76246e-08	2.01459e-07	Bacteria	Proteobacteria	Alphaproteobacteria	Rhizobiales	Stappiaceae	Agaricicola	ASV1193	42-91	1.80187e-07
4.37767	-32.1104	4.62334	-6.94529	3.77694e-12	9.86801e-11	Bacteria	Actinobacteria	Actinobacteria	Micrococcales	Microbacteriaceae	unclassified	ASV1054	42-91	7.97031e-11
97.1052	39.4352	1.78379	22.1076	2.67262e-108	4.39914e-105	Bacteria	Verrucomicrobia	Verrucomicrobiae	Verrucomicrobiales	Rubritaleaceae	Luteolibacter	ASV171	42-91	1.75965e-104
7.33088	44.643	4.41926	10.1019	5.41702e-24	6.85878e-22	Bacteria	Bacteroidetes	Bacteroidia	Flavobacteriales	Crocinitomicaceae	Fluviicola	ASV842	42-91	5.40389e-22
1.14669	-26.1878	4.6191	-5.66945	1.43255e-08	1.67232e-07	Bacteria	Bacteroidetes	Bacteroidia	Bacteroidales	Dysgonomonadaceae	Dysgonomonas	ASV1674	42-91	1.49476e-07
0.943012	26.2936	4.61898	5.6925	1.25192e-08	1.48249e-07	Bacteria	Bacteroidetes	Bacteroidia	Sphingobacteriales	NS11-12_marine_group	unclassified	ASV2001	42-91	1.32394e-07
2421.35	-3.25677	1.02333	-3.18253	0.00145995	0.00877035	Bacteria	Proteobacteria	Gammaproteobacteria	Pseudomonadales	Moraxellaceae	Acinetobacter	ASV5	42-91	0.00751549
56.6945	4.33746	1.59278	2.7232	0.00646535	0.0352383	Bacteria	Bacteroidetes	Bacteroidia	Sphingobacteriales	Sphingobacteriaceae	Nubsella	ASV295	42-91	0.0299774
31.431	28.0659	3.97515	7.06034	1.66094e-12	4.63375e-11	Bacteria	Proteobacteria	Gammaproteobacteria	Betaproteobacteriales	Burkholderiaceae	unclassified	ASV392	42-91	3.63311e-11
30.1702	6.2987	2.36637	2.66176	0.00777329	0.0414073	Bacteria	Acidobacteria	Acidobacteriia	Acidobacteriales	Acidobacteriaceae_(Subgroup_1)	Terriglobus	ASV450	42-91	0.0355907
115.928	9.36724	1.75695	5.33154	9.73835e-08	1.00813e-06	Bacteria	Bacteroidetes	Bacteroidia	Flavobacteriales	Flavobacteriaceae	Flavobacterium	ASV149	42-91	9.0179e-07
58.6694	5.42727	1.38228	3.92633	8.6253e-05	0.000625429	Bacteria	Bacteroidetes	Bacteroidia	Flavobacteriales	Flavobacteriaceae	Flavobacterium	ASV278	42-91	0.000550815
61.0365	4.01379	1.53237	2.61934	0.00881003	0.0463301	Bacteria	Bacteroidetes	Bacteroidia	Cytophagales	Spirosomaceae	Dyadobacter	ASV273	42-91	0.0398114
126.631	-3.1327	0.776496	-4.0344	5.47413e-05	0.000428564	Bacteria	Proteobacteria	Gammaproteobacteria	Pseudomonadales	Pseudomonadaceae	Pseudomonas	ASV139	42-91	0.000364057
1.65348	33.1802	4.60016	7.21283	5.48011e-13	1.67548e-11	Bacteria	Verrucomicrobia	Verrucomicrobiae	Chthoniobacterales	Terrimicrobiaceae	Terrimicrobium	ASV1583	42-91	1.29251e-11
4.59725	-38.6922	4.5981	-8.41482	3.93497e-17	2.49114e-15	Bacteria	Proteobacteria	Gammaproteobacteria	Betaproteobacteriales	Methylophilaceae	Methylotenera	ASV1033	42-91	1.8245e-15
60.8185	6.49765	1.26504	5.13631	2.80185e-07	2.74515e-06	Bacteria	Firmicutes	Bacilli	Bacillales	Paenibacillaceae	Cohnella	ASV263	42-91	2.49627e-06
1.71526	-37.2877	4.6198	-8.07129	6.95615e-16	3.46965e-14	Bacteria	Proteobacteria	Alphaproteobacteria	Rickettsiales	Rickettsiaceae	unclassified	ASV1619	42-91	2.64736e-14
26.3514	7.40396	2.11224	3.50527	0.000456147	0.0029913	Bacteria	Bacteroidetes	Bacteroidia	Sphingobacteriales	Sphingobacteriaceae	Mucilaginibacter	ASV455	42-91	0.0025647
3.5707	27.4049	4.63462	5.91309	3.35743e-09	4.68333e-08	Bacteria	Proteobacteria	Alphaproteobacteria	Rhodobacterales	Rhodobacteraceae	unclassified	ASV1153	42-91	4.03382e-08
2.84547	19.3553	4.62325	4.18651	2.83278e-05	0.000228566	Bacteria	Actinobacteria	Acidimicrobiia	Microtrichales	Iamiaceae	Iamia	ASV1117	42-91	0.000196533
3.00669	36.6086	4.59876	7.96055	1.71275e-15	7.83109e-14	Bacteria	Bacteroidetes	Bacteroidia	Chitinophagales	Chitinophagaceae	unclassified	ASV1299	42-91	6.09555e-14
16.7479	21.918	4.61599	4.74828	2.05155e-06	1.92963e-05	Bacteria	Proteobacteria	Gammaproteobacteria	Betaproteobacteriales	Burkholderiaceae	unclassified	ASV439	42-91	1.66552e-05
2.75773	27.3675	4.63448	5.9052	3.52222e-09	4.87101e-08	Bacteria	Firmicutes	Clostridia	Clostridiales	Ruminococcaceae	Ruminococcaceae_NK4A214_group	ASV1446	42-91	4.20877e-08
0.928892	28.7	4.61953	6.21274	5.20675e-10	9.11735e-09	Bacteria	Bacteroidetes	Bacteroidia	Chitinophagales	Chitinophagaceae	unclassified	ASV1968	42-91	7.73843e-09
3.3212	44.2118	4.58404	9.64474	5.17445e-22	5.6781e-20	Bacteria	Bacteroidetes	Bacteroidia	unclassified	unclassified	unclassified	ASV1159	42-91	4.25858e-20
35.8908	8.54718	2.01194	4.24823	2.15465e-05	0.000180028	Bacteria	Bacteroidetes	Bacteroidia	Chitinophagales	Chitinophagaceae	Taibaiella	ASV367	42-91	0.000152869
19.7277	22.0012	4.59878	4.78413	1.71727e-06	1.6245e-05	Bacteria	Proteobacteria	Alphaproteobacteria	Caulobacterales	Caulobacteraceae	Asticcacaulis	ASV444	42-91	1.40454e-05
12.0756	-33.3488	2.75964	-12.0845	1.27613e-33	2.62563e-31	Bacteria	Bacteroidetes	Bacteroidia	Flavobacteriales	Weeksellaceae	Chryseobacterium	ASV688	42-91	3.00072e-31
5.32557	29.1822	4.61555	6.32259	2.57218e-10	4.86645e-09	Bacteria	Bacteroidetes	Bacteroidia	Cytophagales	Spirosomaceae	Leadbetterella	ASV923	42-91	4.05149e-09
49.4358	-4.28082	1.4454	-2.96169	0.00305952	0.0174255	Bacteria	Proteobacteria	Gammaproteobacteria	Pseudomonadales	Moraxellaceae	Acinetobacter	ASV294	42-91	0.0149769
1.31149	26.3303	4.61783	5.70189	1.18488e-08	1.42359e-07	Bacteria	Bacteroidetes	Bacteroidia	Chitinophagales	Chitinophagaceae	Niabella	ASV1782	42-91	1.25827e-07
0.771101	28.8987	4.6209	6.25391	4.00292e-10	7.24045e-09	Bacteria	Bacteroidetes	Bacteroidia	Cytophagales	Spirosomaceae	unclassified	ASV2590	42-91	6.07264e-09
381.404	1.79165	0.69169	2.59024	0.00959082	0.0496431	Bacteria	Proteobacteria	Deltaproteobacteria	Myxococcales	Sandaracinaceae	unclassified	ASV55	42-91	0.0429857
13.4537	35.8828	3.46609	10.3525	4.07561e-25	6.0986e-23	Bacteria	Proteobacteria	Alphaproteobacteria	Rhodobacterales	Rhodobacteraceae	unclassified	ASV622	42-91	4.62652e-23
2.75975	30.5813	4.63423	6.59901	4.13917e-11	8.7347e-10	Bacteria	Proteobacteria	Deltaproteobacteria	Bdellovibrionales	Bacteriovoracaceae	Bacteriovorax	ASV1384	42-91	7.52825e-10
8.23252	38.9548	4.04373	9.63338	5.77981e-22	5.94598e-20	Bacteria	Proteobacteria	Gammaproteobacteria	Betaproteobacteriales	Burkholderiaceae	unclassified	ASV801	42-91	4.69805e-20
6.97861	-26.5602	4.38172	-6.06159	1.34784e-09	2.09297e-08	Bacteria	Actinobacteria	Thermoleophilia	Gaiellales	Gaiellaceae	Gaiella	ASV729	42-91	1.78196e-08
2.24177	35.9893	4.59879	7.82583	5.04321e-15	2.24355e-13	Bacteria	Proteobacteria	Alphaproteobacteria	Rhizobiales	Devosiaceae	unclassified	ASV1318	42-91	1.68551e-13
0.795145	18.291	4.61825	3.96059	7.47661e-05	0.000551861	Bacteria	Proteobacteria	Alphaproteobacteria	Micropepsales	Micropepsaceae	unclassified	ASV1783	42-91	0.000483846
2.1497	-37.7688	4.41811	-8.54863	1.24554e-17	8.91371e-16	Bacteria	Bacteroidetes	Bacteroidia	Flavobacteriales	Weeksellaceae	unclassified	ASV1448	42-91	6.35707e-16
10.8181	-25.744	4.58012	-5.62083	1.90046e-08	2.15735e-07	Bacteria	Proteobacteria	Alphaproteobacteria	Rhizobiales	Xanthobacteraceae	unclassified	ASV662	42-91	1.93394e-07
3.45837	-14.2536	4.63455	-3.07551	0.00210143	0.0122225	Bacteria	Bacteroidetes	Bacteroidia	Chitinophagales	Chitinophagaceae	unclassified	ASV916	42-91	0.0104737
1.01664	25.8477	4.61835	5.59673	2.1843e-08	2.46257e-07	Bacteria	Proteobacteria	Gammaproteobacteria	Betaproteobacteriales	Burkholderiaceae	Burkholderia-Caballeronia-Paraburkholderia	ASV1952	42-91	2.19229e-07
3.08368	24.1578	4.58155	5.27285	1.34324e-07	1.37328e-06	Bacteria	Proteobacteria	Alphaproteobacteria	Reyranellales	Reyranellaceae	Reyranella	ASV1223	42-91	1.22492e-06
16.9079	31.23	4.63419	6.73903	1.59445e-11	3.64508e-10	Bacteria	Bacteroidetes	Bacteroidia	Sphingobacteriales	Sphingobacteriaceae	Mucilaginibacter	ASV587	42-91	3.07855e-10
0.467555	-25.0169	4.62357	-5.41073	6.27687e-08	6.58072e-07	Bacteria	Firmicutes	Bacilli	Bacillales	Paenibacillaceae	Paenibacillus	ASV2703	42-91	5.85367e-07
2.06412	19.6547	4.63493	4.24055	2.2297e-05	0.000185358	Bacteria	Bacteroidetes	Bacteroidia	Cytophagales	Cyclobacteriaceae	Algoriphagus	ASV1391	42-91	0.000157177
0.823339	-20.1801	4.63506	-4.35379	1.33804e-05	0.000117149	Bacteria	FBP	unclassified	unclassified	unclassified	unclassified	ASV1695	42-91	9.78847e-05
207.068	5.44577	1.68441	3.23304	0.0012248	0.00749451	Bacteria	Bacteroidetes	Bacteroidia	Flavobacteriales	Flavobacteriaceae	Flavobacterium	ASV97	42-91	0.00636472
0.281761	17.7276	4.62381	3.83397	0.000126091	0.000886946	Bacteria	Bacteroidetes	Bacteroidia	Cytophagales	Spirosomaceae	Leadbetterella	ASV2741	42-91	0.000780246
22.2735	-32.1138	4.5798	-7.01206	2.34836e-12	6.33672e-11	Bacteria	Proteobacteria	Alphaproteobacteria	Caulobacterales	Caulobacteraceae	Caulobacter	ASV486	42-91	5.05281e-11
5.59664	-30.8484	4.61629	-6.6825	2.34903e-11	5.15534e-10	Bacteria	Firmicutes	Bacilli	Bacillales	Paenibacillaceae	Paenibacillus	ASV872	42-91	4.39376e-10
3.98201	38.5247	4.58153	8.4087	4.14574e-17	2.52737e-15	Bacteria	Proteobacteria	Gammaproteobacteria	Betaproteobacteriales	Burkholderiaceae	Hydrogenophaga	ASV1126	42-91	1.90878e-15
39.8752	-8.14478	1.57868	-5.15922	2.47979e-07	2.44415e-06	Bacteria	Firmicutes	Bacilli	Bacillales	Paenibacillaceae	Paenibacillus	ASV346	42-91	2.21833e-06
33.7558	7.62982	1.89565	4.0249	5.69994e-05	0.000440474	Bacteria	Verrucomicrobia	Verrucomicrobiae	Verrucomicrobiales	Rubritaleaceae	Luteolibacter	ASV363	42-91	0.000376791
3.27092	-32.4417	4.59921	-7.05375	1.74157e-12	4.7777e-11	Bacteria	Proteobacteria	Gammaproteobacteria	Betaproteobacteriales	SC-I-84	unclassified	ASV980	42-91	3.79685e-11
3.44066	-30.1845	4.61624	-6.53875	6.20351e-11	1.29253e-09	Bacteria	Bacteroidetes	Bacteroidia	Flavobacteriales	Crocinitomicaceae	Fluviicola	ASV1176	42-91	1.09501e-09
18.7302	26.4466	4.63506	5.70578	1.1581e-08	1.40165e-07	Bacteria	Proteobacteria	Alphaproteobacteria	Rhizobiales	Rhizobiaceae	unclassified	ASV534	42-91	1.23381e-07
0.759323	27.7563	4.62452	6.00199	1.94919e-09	2.90771e-08	Bacteria	Firmicutes	Clostridia	Clostridiales	Lachnospiraceae	unclassified	ASV2426	42-91	2.46324e-08
18.998	8.79775	2.84762	3.08951	0.00200487	0.0117438	Bacteria	Bacteroidetes	Bacteroidia	Sphingobacteriales	env.OPS_17	unclassified	ASV509	42-91	0.0100457
1.70986	15.7804	4.63455	3.40494	0.000661778	0.00423703	Bacteria	Bacteroidetes	Bacteroidia	Cytophagales	Microscillaceae	unclassified	ASV1445	42-91	0.00360691
1.29785	-28.2733	4.60246	-6.14309	8.09327e-10	1.33215e-08	Bacteria	Bacteroidetes	Bacteroidia	Chitinophagales	Saprospiraceae	unclassified	ASV1474	42-91	1.14594e-08
0.374192	25.2736	4.62751	5.46161	4.71841e-08	5.01065e-07	Bacteria	unclassified	unclassified	unclassified	unclassified	unclassified	ASV3091	42-91	4.50232e-07
26.3898	6.11314	1.87402	3.26205	0.0011061	0.0068189	Bacteria	Proteobacteria	Alphaproteobacteria	Sphingomonadales	Sphingomonadaceae	Sphingopyxis	ASV447	42-91	0.00578442
3.88859	29.1843	3.91539	7.45373	9.07382e-14	3.24685e-12	Bacteria	Bacteroidetes	Bacteroidia	Chitinophagales	Chitinophagaceae	Taibaiella	ASV1129	42-91	2.44844e-12
0.432554	-27.2276	4.6223	-5.89048	3.8507e-09	5.11149e-08	Bacteria	Chloroflexi	KD4-96	unclassified	unclassified	unclassified	ASV2710	42-91	4.53542e-08
1.99208	-25.4478	4.58293	-5.55273	2.81247e-08	3.06577e-07	Bacteria	Actinobacteria	Acidimicrobiia	Microtrichales	unclassified	unclassified	ASV1378	42-91	2.77449e-07
2.31479	27.6204	4.6167	5.98272	2.19445e-09	3.19652e-08	Bacteria	Proteobacteria	Alphaproteobacteria	Rhizobiales	Devosiaceae	unclassified	ASV1374	42-91	2.73124e-08
15.733	-38.7032	4.58019	-8.45014	2.90962e-17	1.99552e-15	Bacteria	Bacteroidetes	Bacteroidia	Sphingobacteriales	Sphingobacteriaceae	Pedobacter	ASV555	42-91	1.38819e-15
5.90351	27.0031	4.38441	6.15891	7.32495e-10	1.24298e-08	Bacteria	Bacteroidetes	Bacteroidia	Cytophagales	Spirosomaceae	Dyadobacter	ASV983	42-91	1.053e-08
10.4212	26.3875	3.25355	8.11038	5.04611e-16	2.76863e-14	Bacteria	Proteobacteria	Alphaproteobacteria	Sphingomonadales	Sphingomonadaceae	Sphingopyxis	ASV613	42-91	2.02583e-14
80.3168	8.95192	1.22288	7.32034	2.47339e-13	8.14241e-12	Bacteria	Verrucomicrobia	Verrucomicrobiae	Verrucomicrobiales	Rubritaleaceae	Luteolibacter	ASV200	42-91	6.09918e-12
3.7768	25.0097	4.63416	5.39682	6.78333e-08	7.06668e-07	Bacteria	Bacteroidetes	Bacteroidia	Cytophagales	Cytophagaceae	Cytophaga	ASV1340	42-91	6.31703e-07
611.541	2.66601	0.549131	4.85497	1.20404e-06	1.15898e-05	Bacteria	Bacteroidetes	Bacteroidia	Sphingobacteriales	Sphingobacteriaceae	Pedobacter	ASV35	42-91	1.0022e-05
2.074	26.6055	4.63694	5.73773	9.59531e-09	1.17865e-07	Bacteria	Proteobacteria	Alphaproteobacteria	Rickettsiales	SM2D12	unclassified	ASV1492	42-91	1.03566e-07
14.0534	-11.7309	4.54506	-2.58103	0.00985065	0.0508281	Bacteria	Bacteroidetes	Bacteroidia	Cytophagales	Microscillaceae	unclassified	ASV591	42-91	0.0440902
131.004	-17.3531	2.51794	-6.8918	5.50913e-12	1.39508e-10	Bacteria	Proteobacteria	Gammaproteobacteria	Pseudomonadales	Moraxellaceae	Acinetobacter	ASV116	42-91	1.12997e-10
92.4649	7.44633	1.43902	5.17457	2.28442e-07	2.27888e-06	Bacteria	Bacteroidetes	Bacteroidia	Flavobacteriales	Flavobacteriaceae	Flavobacterium	ASV188	42-91	2.05473e-06
81.5759	-6.36507	1.48782	-4.27812	1.88478e-05	0.000159915	Bacteria	Proteobacteria	Gammaproteobacteria	Pseudomonadales	Pseudomonadaceae	Pseudomonas	ASV186	42-91	0.000134738
3.46994	-28.2789	4.61559	-6.12681	8.96587e-10	1.46117e-08	Bacteria	Bacteroidetes	Bacteroidia	Flavobacteriales	Flavobacteriaceae	Flavobacterium	ASV1099	42-91	1.25332e-08
5.32952	27.2063	4.42227	6.15211	7.64607e-10	1.28423e-08	Bacteria	Bacteroidetes	Bacteroidia	Cytophagales	Spirosomaceae	Dyadobacter	ASV1027	42-91	1.09438e-08
1.40685	34.3839	4.60304	7.46983	8.02965e-14	2.93707e-12	Bacteria	Bacteroidetes	Bacteroidia	Sphingobacteriales	Sphingobacteriaceae	Mucilaginibacter	ASV1757	42-91	2.22131e-12
0.646296	-27.7861	4.63863	-5.99015	2.09654e-09	3.08116e-08	Bacteria	Firmicutes	Clostridia	Clostridiales	Peptococcaceae	Desulfosporosinus	ASV2511	42-91	2.62426e-08
5.12793	25.127	4.63394	5.42237	5.88132e-08	6.20555e-07	Bacteria	Bacteroidetes	Bacteroidia	Bacteroidales	unclassified	unclassified	ASV849	42-91	5.51605e-07
493.764	37.6272	1.9824	18.9807	2.46466e-80	1.35228e-77	Bacteria	Bacteroidetes	Bacteroidia	Chitinophagales	unclassified	unclassified	ASV44	42-91	3.24546e-77
239.597	2.84686	0.983912	2.89341	0.00381081	0.0215553	Bacteria	Bacteroidetes	Bacteroidia	Sphingobacteriales	Sphingobacteriaceae	Mucilaginibacter	ASV84	42-91	0.018476
81.3581	-4.37227	1.57132	-2.78255	0.00539336	0.0297902	Bacteria	Proteobacteria	Gammaproteobacteria	Pseudomonadales	Moraxellaceae	Acinetobacter	ASV201	42-91	0.0253824
0.721574	18.9414	4.61915	4.10062	4.12038e-05	0.000326065	Bacteria	Proteobacteria	Gammaproteobacteria	Methylococcales	Methylomonaceae	Methylobacter	ASV1878	42-91	0.000279101
155.134	8.77429	1.46213	6.00102	1.96085e-09	2.90771e-08	Bacteria	Bacteroidetes	Bacteroidia	Chitinophagales	Chitinophagaceae	Taibaiella	ASV128	42-91	2.47323e-08
132.118	6.84577	1.56283	4.38038	1.18471e-05	0.000104987	Bacteria	Proteobacteria	Gammaproteobacteria	Betaproteobacteriales	Burkholderiaceae	unclassified	ASV146	42-91	8.74454e-05
3.99973	-25.4254	4.63702	-5.48314	4.17831e-08	4.4951e-07	Bacteria	Bacteroidetes	Bacteroidia	Cytophagales	Spirosomaceae	Dyadobacter	ASV1102	42-91	4.0102e-07
431.574	2.95332	0.757804	3.89721	9.7308e-05	0.000696387	Bacteria	Bacteroidetes	Bacteroidia	Flavobacteriales	Flavobacteriaceae	Flavobacterium	ASV52	42-91	0.000613674
1.73035	30.0953	4.63591	6.49178	8.48258e-11	1.74529e-09	Bacteria	Proteobacteria	Deltaproteobacteria	Oligoflexales	Oligoflexaceae	Oligoflexus	ASV1536	42-91	1.44313e-09
2.71245	28.2478	4.63426	6.09544	1.09137e-09	1.75294e-08	Bacteria	Verrucomicrobia	Verrucomicrobiae	Opitutales	Opitutaceae	unclassified	ASV1300	42-91	1.48463e-08
84.7384	5.19671	1.8614	2.79182	0.00524121	0.0290472	Bacteria	Proteobacteria	Gammaproteobacteria	Betaproteobacteriales	Burkholderiaceae	unclassified	ASV196	42-91	0.0247016
2452.97	-1.93467	0.709104	-2.72833	0.00636555	0.0348096	Bacteria	Proteobacteria	Gammaproteobacteria	Enterobacteriales	Enterobacteriaceae	unclassified	ASV6	42-91	0.0295562
108.617	2.89077	0.967274	2.98857	0.00280288	0.0160751	Bacteria	Verrucomicrobia	Verrucomicrobiae	Verrucomicrobiales	Rubritaleaceae	Luteolibacter	ASV159	42-91	0.0138027
430.666	9.06306	1.26316	7.1749	7.23608e-13	2.16556e-11	Bacteria	Bacteroidetes	Bacteroidia	Cytophagales	Spirosomaceae	Dyadobacter	ASV54	42-91	1.67207e-11
39.9321	17.852	2.28465	7.8139	5.54469e-15	2.40172e-13	Bacteria	Proteobacteria	Alphaproteobacteria	Acetobacterales	Acetobacteraceae	Gluconobacter	ASV300	42-91	1.84375e-13
40.4084	8.11836	2.03416	3.991	6.57946e-05	0.000499069	Bacteria	Bacteroidetes	Bacteroidia	Chitinophagales	Chitinophagaceae	Filimonas	ASV350	42-91	0.000430181
21.9067	-22.9636	3.36493	-6.82439	8.82984e-12	2.13734e-10	Bacteria	Firmicutes	Bacilli	Bacillales	Paenibacillaceae	Paenibacillus	ASV502	42-91	1.76169e-10
18.6673	-6.54265	2.23054	-2.93321	0.00335474	0.019041	Bacteria	Proteobacteria	Gammaproteobacteria	Pseudomonadales	Moraxellaceae	Acinetobacter	ASV551	42-91	0.0163733
342.306	-1.9771	0.777822	-2.54184	0.011027	0.0558474	Bacteria	Actinobacteria	Actinobacteria	Micrococcales	Cellulomonadaceae	Cellulomonas	ASV62	42-91	0.0486932
42.1555	9.25179	2.01754	4.58569	4.52495e-06	4.16093e-05	Bacteria	Bacteroidetes	Bacteroidia	Flavobacteriales	Weeksellaceae	unclassified	ASV321	42-91	3.52989e-05
0.241311	-14.9299	4.63698	-3.21975	0.00128304	0.00779293	Bacteria	Proteobacteria	Deltaproteobacteria	Myxococcales	Haliangiaceae	Haliangium	ASV2777	42-91	0.0066516
4.53659	-27.0654	4.6353	-5.83897	5.2526e-09	6.8077e-08	Bacteria	Bacteroidetes	Bacteroidia	Chitinophagales	Chitinophagaceae	Taibaiella	ASV984	42-91	6.03545e-08
5.669	14.8201	4.63432	3.1979	0.0013843	0.00834638	Bacteria	Proteobacteria	Alphaproteobacteria	Rhizobiales	Xanthobacteraceae	unclassified	ASV769	42-91	0.00714843
3.05642	-24.2223	4.6164	-5.24701	1.54585e-07	1.5515e-06	Bacteria	Bacteroidetes	Bacteroidia	Sphingobacteriales	Sphingobacteriaceae	Pedobacter	ASV979	42-91	1.39998e-06
12.0055	-40.4294	2.5723	-15.7172	1.1524e-55	4.74212e-53	Bacteria	Firmicutes	Bacilli	Bacillales	Paenibacillaceae	Paenibacillus	ASV685	42-91	9.48424e-53
0.97822	25.7605	4.61829	5.57794	2.43378e-08	2.6886e-07	Bacteria	Proteobacteria	Alphaproteobacteria	Caulobacterales	Caulobacteraceae	Asticcacaulis	ASV1953	42-91	2.42788e-07
4.90269	31.7467	4.61628	6.87711	6.10805e-12	1.52331e-10	Bacteria	Bacteroidetes	Bacteroidia	Cytophagales	Spirosomaceae	Leadbetterella	ASV1049	42-91	1.24506e-10
35.1206	-4.50371	1.46042	-3.08385	0.00204338	0.011927	Bacteria	Firmicutes	Bacilli	Bacillales	Paenibacillaceae	Paenibacillus	ASV375	42-91	0.0102153
537.112	-2.43323	0.746307	-3.26036	0.00111272	0.00683411	Bacteria	Proteobacteria	Gammaproteobacteria	Pseudomonadales	Pseudomonadaceae	Pseudomonas	ASV39	42-91	0.00580981
0.495777	-16.6366	4.63469	-3.58959	0.000331199	0.0022071	Bacteria	Verrucomicrobia	Verrucomicrobiae	Pedosphaerales	Pedosphaeraceae	unclassified	ASV2310	42-91	0.00190947
29.7933	8.57947	1.88883	4.54221	5.56679e-06	5.09052e-05	Bacteria	Bacteroidetes	Bacteroidia	Chitinophagales	Chitinophagaceae	Taibaiella	ASV430	42-91	4.30185e-05
11.2137	-45.2761	4.56357	-9.92122	3.36629e-23	3.95779e-21	Bacteria	Proteobacteria	Gammaproteobacteria	Xanthomonadales	Xanthomonadaceae	Xanthomonas	ASV735	42-91	3.03612e-21
21.4807	17.8825	2.38796	7.48861	6.9607e-14	2.60394e-12	Bacteria	Proteobacteria	Alphaproteobacteria	Caulobacterales	Caulobacteraceae	Brevundimonas	ASV354	42-91	1.95018e-12
73.3597	19.4216	2.5097	7.73861	1.00508e-14	4.24195e-13	Bacteria	Proteobacteria	Alphaproteobacteria	Acetobacterales	Acetobacteraceae	Acetobacter	ASV223	42-91	3.21235e-13
0.896627	26.7564	4.63648	5.77083	7.88815e-09	9.98761e-08	Bacteria	Bacteroidetes	Bacteroidia	Cytophagales	Spirosomaceae	Fibrisoma	ASV2160	42-91	8.71403e-08
0.885168	-19.4336	4.61802	-4.20821	2.57407e-05	0.000210792	Bacteria	Firmicutes	Clostridia	Clostridiales	Ruminococcaceae	unclassified	ASV1749	42-91	0.000179341
6.9422	37.2089	4.61705	8.05903	7.69007e-16	3.7229e-14	Bacteria	Proteobacteria	Gammaproteobacteria	Betaproteobacteriales	unclassified	unclassified	ASV823	42-91	2.90985e-14
6.98176	28.0326	4.61566	6.07336	1.25263e-09	1.97059e-08	Bacteria	Proteobacteria	Gammaproteobacteria	Betaproteobacteriales	Burkholderiaceae	Aquabacterium	ASV806	42-91	1.6797e-08
1.06744	-28.7546	4.61851	-6.22595	4.78647e-10	8.56361e-09	Bacteria	Actinobacteria	Actinobacteria	Micrococcales	Microbacteriaceae	Leifsonia	ASV1821	42-91	7.17861e-09
28.6893	-9.15719	2.32446	-3.93949	8.16548e-05	0.00059735	Bacteria	Proteobacteria	Gammaproteobacteria	unclassified	unclassified	unclassified	ASV388	42-91	0.000523991
277.944	1.17831	0.458121	2.57204	0.0101102	0.0518422	Bacteria	Proteobacteria	Gammaproteobacteria	Betaproteobacteriales	Burkholderiaceae	Herbaspirillum	ASV76	42-91	0.0451267
16.4271	7.752	2.99112	2.59167	0.00955101	0.0495929	Bacteria	Bacteroidetes	Bacteroidia	Sphingobacteriales	env.OPS_17	unclassified	ASV577	42-91	0.0428364
55.7377	4.71044	1.7131	2.74966	0.00596566	0.0327316	Bacteria	Bacteroidetes	Bacteroidia	Flavobacteriales	Weeksellaceae	Chryseobacterium	ASV293	42-91	0.0278567
264.103	-29.5401	3.17061	-9.31683	1.19863e-20	1.09608e-18	Bacteria	Proteobacteria	Gammaproteobacteria	Pseudomonadales	Moraxellaceae	Acinetobacter	ASV77	42-91	8.8672e-19
2.4176	-25.0646	4.58171	-5.47058	4.48557e-08	4.79432e-07	Bacteria	Proteobacteria	Alphaproteobacteria	Reyranellales	Reyranellaceae	Reyranella	ASV1306	42-91	4.29884e-07
184.842	4.53373	0.662789	6.84038	7.89834e-12	1.9404e-10	Bacteria	Bacteroidetes	Bacteroidia	Chitinophagales	Chitinophagaceae	unclassified	ASV102	42-91	1.58545e-10
30.9036	12.762	4.5436	2.80878	0.00497303	0.0277478	Bacteria	Proteobacteria	Gammaproteobacteria	Xanthomonadales	Rhodanobacteraceae	Dokdonella	ASV396	42-91	0.0235897
16.1617	-10.3812	3.1811	-3.26341	0.0011008	0.00681172	Bacteria	Bacteroidetes	Bacteroidia	Chitinophagales	Chitinophagaceae	unclassified	ASV561	42-91	0.00576585
33.4749	37.2888	4.60029	8.10575	5.2422e-16	2.78344e-14	Bacteria	Bacteroidetes	Bacteroidia	Flavobacteriales	Flavobacteriaceae	Flavobacterium	ASV384	42-91	2.0918e-14
255.643	16.1448	4.63409	3.48392	0.000494124	0.00321473	Bacteria	Proteobacteria	Alphaproteobacteria	Caulobacterales	Caulobacteraceae	Brevundimonas	ASV46	42-91	0.0027574
24.224	-44.822	4.1409	-10.8242	2.64335e-27	4.83438e-25	Bacteria	Proteobacteria	Gammaproteobacteria	Pseudomonadales	Pseudomonadaceae	Pseudomonas	ASV452	42-91	3.55179e-25
15.1511	-41.4904	2.99454	-13.8553	1.18113e-43	3.88827e-41	Bacteria	Firmicutes	Bacilli	Bacillales	Paenibacillaceae	Paenibacillus	ASV581	42-91	4.57444e-41
67.7365	6.95732	1.81915	3.82449	0.000131044	0.000913976	Bacteria	Proteobacteria	Alphaproteobacteria	Acetobacterales	Acetobacteraceae	Gluconacetobacter	ASV243	42-91	0.000805596
17.1349	-18.7232	4.62867	-4.04505	5.23121e-05	0.000411989	Bacteria	Proteobacteria	Gammaproteobacteria	Betaproteobacteriales	Burkholderiaceae	unclassified	ASV538	42-91	0.000349313
1227.76	1.48048	0.44825	3.3028	0.000957243	0.00599096	Bacteria	Proteobacteria	Alphaproteobacteria	Acetobacterales	Acetobacteraceae	Acetobacter	ASV12	42-91	0.00507855
3.25396	-26.2915	4.59837	-5.71756	1.08062e-08	1.31756e-07	Bacteria	Proteobacteria	Alphaproteobacteria	Rhizobiales	Xanthobacteraceae	unclassified	ASV1055	42-91	1.155e-07
1139.69	-3.68296	1.40776	-2.61618	0.00889184	0.0466114	Bacteria	Proteobacteria	Gammaproteobacteria	Enterobacteriales	Enterobacteriaceae	unclassified	ASV7	42-91	0.0401536
131.564	-16.1531	4.63481	-3.48518	0.000491813	0.0032124	Bacteria	Actinobacteria	Actinobacteria	Micrococcales	Promicromonosporaceae	Cellulosimicrobium	ASV63	42-91	0.00275114
5.47403	16.2701	4.63594	3.50955	0.000448865	0.00295533	Bacteria	Proteobacteria	Alphaproteobacteria	Rhizobiales	Devosiaceae	Paradevosia	ASV743	42-91	0.00253025
11.8888	30.5694	3.42711	8.91988	4.66773e-19	3.65862e-17	Bacteria	Bacteroidetes	Bacteroidia	Chitinophagales	Chitinophagaceae	unclassified	ASV731	42-91	2.84559e-17
9.86541	17.9281	4.56861	3.9242	8.70188e-05	0.000628215	Bacteria	Proteobacteria	Gammaproteobacteria	Xanthomonadales	Xanthomonadaceae	Stenotrophomonas	ASV553	42-91	0.000555167
2.19176	33.5864	4.59838	7.30396	2.79428e-13	8.84496e-12	Bacteria	Firmicutes	Erysipelotrichia	Erysipelotrichales	Erysipelotrichaceae	Erysipelothrix	ASV1348	42-91	6.78578e-12
2895.74	2.79088	0.772338	3.61355	0.000302036	0.00202094	Bacteria	Bacteroidetes	Bacteroidia	Flavobacteriales	Flavobacteriaceae	Flavobacterium	ASV3	42-91	0.00175207
234.576	5.73138	1.50768	3.80145	0.000143853	0.000990721	Bacteria	Bacteroidetes	Bacteroidia	Bacteroidales	Dysgonomonadaceae	Dysgonomonas	ASV88	42-91	0.00087616
693.407	3.35239	1.03968	3.22443	0.00126222	0.00769485	Bacteria	Bacteroidetes	Bacteroidia	Sphingobacteriales	Sphingobacteriaceae	unclassified	ASV30	42-91	0.00654881
2.21095	-34.2556	4.59914	-7.44825	9.45837e-14	3.31244e-12	Bacteria	Proteobacteria	Deltaproteobacteria	Myxococcales	Myxococcaceae	Corallococcus	ASV1366	42-91	2.54179e-12
29.4136	-8.99444	2.34791	-3.83082	0.000127717	0.000894563	Bacteria	Proteobacteria	Alphaproteobacteria	Sphingomonadales	Sphingomonadaceae	Sphingobium	ASV337	42-91	0.000788827
10.4293	37.7197	3.5877	10.5136	7.4765e-26	1.23063e-23	Bacteria	Bacteroidetes	Bacteroidia	Flavobacteriales	Crocinitomicaceae	Fluviicola	ASV738	42-91	8.63601e-24
80.7937	4.37862	1.2099	3.61899	0.000295759	0.00198702	Bacteria	FBP	unclassified	unclassified	unclassified	unclassified	ASV202	42-91	0.00171717
19.3339	11.811	4.54522	2.59854	0.00936205	0.0487656	Bacteria	Planctomycetes	Planctomycetacia	Planctomycetales	Rubinisphaeraceae	Planctomicrobium	ASV511	42-91	0.0420462
28.0042	-47.312	3.62555	-13.0496	6.3894e-39	1.75282e-36	Bacteria	Bacteroidetes	Bacteroidia	Flavobacteriales	Flavobacteriaceae	Flavobacterium	ASV435	42-91	2.00323e-36
1.99642	30.4565	4.59954	6.62165	3.55216e-11	7.69323e-10	Bacteria	Proteobacteria	Gammaproteobacteria	Xanthomonadales	Rhodanobacteraceae	Luteibacter	ASV1450	42-91	6.5328e-10
51.5113	4.89634	1.55333	3.15216	0.00162067	0.00966532	Bacteria	Bacteroidetes	Bacteroidia	Flavobacteriales	Flavobacteriaceae	Flavobacterium	ASV312	42-91	0.00829745
613.319	-13.8932	4.22721	-3.28662	0.00101398	0.00632202	Bacteria	Proteobacteria	Gammaproteobacteria	Pseudomonadales	Moraxellaceae	Acinetobacter	ASV32	42-91	0.0053494
130.476	5.20216	1.48184	3.51061	0.000447081	0.00295533	Bacteria	Proteobacteria	Alphaproteobacteria	Acetobacterales	Acetobacteraceae	Gluconobacter	ASV123	42-91	0.00252451
50.3275	-8.93529	1.52168	-5.87198	4.30614e-09	5.62532e-08	Bacteria	Proteobacteria	Gammaproteobacteria	Pseudomonadales	Pseudomonadaceae	Pseudomonas	ASV296	42-91	5.00912e-08
13.1821	18.6262	3.52759	5.28015	1.29077e-07	1.32788e-06	Bacteria	Actinobacteria	Actinobacteria	Micrococcales	Microbacteriaceae	unclassified	ASV643	42-91	1.18198e-06
9.75298	-13.1414	3.71472	-3.53766	0.000403692	0.00267934	Bacteria	Bacteroidetes	Bacteroidia	Cytophagales	Microscillaceae	Chryseolinea	ASV698	42-91	0.00229923
6.06138	31.4815	4.61574	6.82046	9.07504e-12	2.16486e-10	Bacteria	Proteobacteria	Gammaproteobacteria	Betaproteobacteriales	Burkholderiaceae	unclassified	ASV940	42-91	1.80514e-10
1.89711	27.9561	4.61705	6.05498	1.40438e-09	2.14038e-08	Bacteria	Proteobacteria	Alphaproteobacteria	Caulobacterales	Caulobacteraceae	Asticcacaulis	ASV1496	42-91	1.84929e-08
1.76679	-17.0989	4.63502	-3.68906	0.000225084	0.00153094	Bacteria	Chloroflexi	KD4-96	unclassified	unclassified	unclassified	ASV1343	42-91	0.00133509
0.3708	24.3489	4.62444	5.26527	1.39981e-07	1.42227e-06	Bacteria	Bacteroidetes	Bacteroidia	Chitinophagales	37-13	unclassified	ASV2908	42-91	1.27122e-06
1.24374	-26.5528	4.61759	-5.75036	8.90555e-09	1.1105e-07	Bacteria	Firmicutes	Clostridia	Clostridiales	Family_XIII	Anaerovorax	ASV1857	42-91	9.72374e-08
146.164	7.57414	1.24723	6.07279	1.25706e-09	1.97059e-08	Bacteria	Proteobacteria	Alphaproteobacteria	Caulobacterales	Caulobacteraceae	Brevundimonas	ASV132	42-91	1.68221e-08
59.1716	3.76871	1.10879	3.39894	0.000676485	0.00429921	Bacteria	Bacteroidetes	Bacteroidia	Cytophagales	Spirosomaceae	unclassified	ASV270	42-91	0.00367187
1.95806	-20.3723	4.61668	-4.41277	1.02058e-05	9.23011e-05	Bacteria	Acidobacteria	Acidobacteriia	Solibacterales	Solibacteraceae_(Subgroup_3)	unclassified	ASV1462	42-91	7.60127e-05
11.2613	7.01096	2.66891	2.6269	0.00861667	0.0455619	Bacteria	BRC1	unclassified	unclassified	unclassified	unclassified	ASV709	42-91	0.039018
37.5654	-12.9752	4.54381	-2.85557	0.00429591	0.024216	Bacteria	Proteobacteria	Alphaproteobacteria	Caulobacterales	Hyphomonadaceae	Hirschia	ASV341	42-91	0.0206304
59.5169	-13.7965	4.54492	-3.03559	0.00240068	0.0139138	Bacteria	Proteobacteria	Alphaproteobacteria	Sphingomonadales	Sphingomonadaceae	Sphingorhabdus	ASV241	42-91	0.0118932
1.03754	-19.6763	4.61757	-4.26117	2.03356e-05	0.000171654	Bacteria	Proteobacteria	Gammaproteobacteria	Gammaproteobacteria_Incertae_Sedis	Unknown_Family	Acidibacter	ASV1659	42-91	0.000144902
0.557405	27.2965	4.62352	5.90385	3.55116e-09	4.87101e-08	Bacteria	Firmicutes	Clostridia	Clostridiales	Ruminococcaceae	Ruminococcaceae_UCG-013	ASV2625	42-91	4.228e-08
5.49431	-42.9401	4.46414	-9.6189	6.65419e-22	6.44282e-20	Bacteria	Verrucomicrobia	Verrucomicrobiae	Chthoniobacterales	Terrimicrobiaceae	Terrimicrobium	ASV917	42-91	5.34283e-20
127.285	8.18655	1.27406	6.42557	1.31376e-10	2.63713e-09	Bacteria	Bacteroidetes	Bacteroidia	Flavobacteriales	Flavobacteriaceae	Flavobacterium	ASV143	42-91	2.18429e-09
4.60391	33.0127	4.61578	7.15214	8.54358e-13	2.5112e-11	Bacteria	Bacteroidetes	Bacteroidia	Cytophagales	Cytophagaceae	Cytophaga	ASV1160	42-91	1.93302e-11
1.20612	23.8903	4.61803	5.17326	2.3005e-07	2.2811e-06	Bacteria	Proteobacteria	Deltaproteobacteria	Bdellovibrionales	Bacteriovoracaceae	unclassified	ASV1709	42-91	2.06637e-06
3.12001	33.6914	4.58394	7.34987	1.98393e-13	6.66438e-12	Bacteria	Firmicutes	Bacilli	Bacillales	Paenibacillaceae	Paenibacillus	ASV1221	42-91	4.9478e-12
23.4399	32.1125	4.1523	7.73367	1.04491e-14	4.29855e-13	Bacteria	Bacteroidetes	Bacteroidia	Chitinophagales	Chitinophagaceae	Taibaiella	ASV497	42-91	3.30754e-13
237.376	1.63893	0.615722	2.6618	0.00777248	0.0414073	Bacteria	Proteobacteria	Deltaproteobacteria	Oligoflexales	Oligoflexaceae	Oligoflexus	ASV86	42-91	0.0355907
133.738	-4.06772	0.987714	-4.11832	3.81646e-05	0.000304946	Bacteria	Bacteroidetes	Bacteroidia	Chitinophagales	Chitinophagaceae	unclassified	ASV133	42-91	0.000259583
20.2293	-14.3656	4.62596	-3.10542	0.00190006	0.0111696	Bacteria	Proteobacteria	Alphaproteobacteria	Rhizobiales	Beijerinckiaceae	Bosea	ASV313	42-91	0.00957154
1.69049	-19.7592	4.61723	-4.27945	1.87354e-05	0.000159915	Bacteria	Proteobacteria	Alphaproteobacteria	Dongiales	Dongiaceae	Dongia	ASV1312	42-91	0.000134366
38.0323	7.35259	2.01262	3.65324	0.000258948	0.00175403	Bacteria	Bacteroidetes	Bacteroidia	Cytophagales	Cytophagaceae	Cytophaga	ASV355	42-91	0.00151011
1.10253	28.5018	4.61955	6.16983	6.83616e-10	1.17212e-08	Bacteria	Proteobacteria	Alphaproteobacteria	unclassified	unclassified	unclassified	ASV2163	42-91	9.89215e-09
6.13364	27.4071	4.6323	5.91651	3.28843e-09	4.62629e-08	Bacteria	Proteobacteria	Alphaproteobacteria	Rhizobiales	Beijerinckiaceae	Bosea	ASV919	42-91	3.96539e-08
13.3527	-9.42151	3.40113	-2.77012	0.00560363	0.0308481	Bacteria	Proteobacteria	Gammaproteobacteria	Xanthomonadales	Xanthomonadaceae	Pseudoxanthomonas	ASV602	42-91	0.026278
0.22888	-15.7897	4.6386	-3.40398	0.000664127	0.00423703	Bacteria	Actinobacteria	Actinobacteria	Corynebacteriales	Tsukamurellaceae	Tsukamurella	ASV3046	42-91	0.00361373
131.725	-7.77259	2.89166	-2.68793	0.00718961	0.038928	Bacteria	Proteobacteria	Gammaproteobacteria	Enterobacteriales	Enterobacteriaceae	unclassified	ASV160	42-91	0.0331487
21.2267	8.72549	2.6626	3.27705	0.00104896	0.00651544	Bacteria	Proteobacteria	Gammaproteobacteria	Xanthomonadales	Xanthomonadaceae	unclassified	ASV528	42-91	0.00550747
2.45877	11.5755	4.40782	2.62613	0.00863627	0.0455619	Bacteria	Bacteroidetes	Bacteroidia	Sphingobacteriales	Sphingobacteriaceae	Pedobacter	ASV1388	42-91	0.0390799
1.09481	18.6333	4.61958	4.03356	5.49374e-05	0.000428564	Bacteria	Bacteroidetes	Bacteroidia	Sphingobacteriales	Sphingobacteriaceae	unclassified	ASV1514	42-91	0.000364993
1.80261	29.1911	4.59969	6.34631	2.2054e-10	4.22104e-09	Bacteria	Actinobacteria	Actinobacteria	Frankiales	Nakamurellaceae	Nakamurella	ASV1437	42-91	3.4821e-09
3.17381	26.8289	4.63529	5.78797	7.12401e-09	9.09002e-08	Bacteria	Proteobacteria	Alphaproteobacteria	Rhizobiales	Rhizobiaceae	unclassified	ASV1218	42-91	7.96341e-08
5.08349	29.8246	4.28892	6.95387	3.55391e-12	9.43506e-11	Bacteria	Bacteroidetes	Bacteroidia	Sphingobacteriales	Sphingobacteriaceae	Pedobacter	ASV1061	42-91	7.54805e-11
21.7001	-11.5631	4.52651	-2.55453	0.0106333	0.0540197	Bacteria	Proteobacteria	Gammaproteobacteria	Betaproteobacteriales	Burkholderiaceae	unclassified	ASV484	42-91	0.0471762
51.4259	5.126	1.64217	3.12148	0.00179946	0.0106544	Bacteria	Bacteroidetes	Bacteroidia	Cytophagales	Spirosomaceae	Dyadobacter	ASV304	42-91	0.0091206
1.08848	26.2099	4.61862	5.67483	1.38829e-08	1.63223e-07	Bacteria	Proteobacteria	Alphaproteobacteria	Rhizobiales	Stappiaceae	Agaricicola	ASV1730	42-91	1.45782e-07
9.72028	-10.5719	3.95919	-2.67021	0.00758044	0.0407758	Bacteria	Verrucomicrobia	Verrucomicrobiae	Verrucomicrobiales	Verrucomicrobiaceae	Prosthecobacter	ASV728	42-91	0.0347802
8.73289	20.8391	4.61743	4.51313	6.38765e-06	5.80888e-05	Bacteria	Firmicutes	Clostridia	Clostridiales	Lachnospiraceae	Anaerocolumna	ASV774	42-91	4.88459e-05

## Sheet: PHYLA
Supplementary Table 2. Abundance changes expressed as log2fold at the phylum level. Only the phyla which exhibit significant differences over time are considered (p-values < 0.05).
baseMean	log2FoldChange	lfcSE	stat	pvalue	padj	Kingdom	Phylum	ASV	compar	padjBIEN
108.564	2.41642	0.664635	3.63572	0.000277209	0.000658371	Bacteria	Acidobacteria	ASV290	0-14	0.00105339
177.013	-6.11345	1.16496	-5.24779	1.53936e-07	7.31198e-07	Bacteria	FBP	ASV199	0-14	1.4624e-06
1.77366	-21.7011	4.92378	-4.40742	1.04611e-05	3.31267e-05	Bacteria	Fibrobacteres	ASV1694	0-14	6.62534e-05
26.6011	-22.6986	4.92316	-4.61057	4.01558e-06	1.52592e-05	Bacteria	Epsilonbacteraeota	ASV368	0-14	3.05184e-05
79.5023	-7.46668	1.10806	-6.73853	1.6e-11	1.01333e-10	Bacteria	Planctomycetes	ASV236	0-14	2.02666e-10
16.8989	-6.03213	1.49578	-4.03276	5.51253e-05	0.000149626	Bacteria	Chloroflexi	ASV960	0-14	0.000261845
3473.95	-3.75084	0.425532	-8.81446	1.20265e-18	2.28504e-17	Bacteria	Actinobacteria	ASV62	0-14	4.57007e-17
11.0337	-4.30645	1.80057	-2.39172	0.0167697	0.0354028	Bacteria	BRC1	ASV709	0-14	0.0455179
83.2243	9.72859	1.24378	7.82176	5.20897e-15	4.94852e-14	Bacteria	Patescibacteria	ASV364	0-14	7.91763e-14
1096.89	1.4949	0.520041	2.87458	0.00404566	0.0128112	Bacteria	Verrucomicrobia	ASV108	14-28	0.0133683
177.013	9.93292	1.11858	8.87994	6.6895e-19	1.271e-17	Bacteria	FBP	ASV199	14-28	4.57007e-17
40.8469	4.26317	0.905887	4.70607	2.52532e-06	2.39905e-05	Bacteria	unclassified	ASV501	14-28	2.13249e-05
1012.77	-6.35943	1.80923	-3.51499	0.000439777	0.00167115	Bacteria	Cyanobacteria	ASV15	14-28	0.00159158
22.2366	3.33509	1.37801	2.42023	0.0155108	0.0421008	Bacteria	Armatimonadetes	ASV402	14-28	0.0436601
11.0337	6.85239	1.67587	4.08887	4.33485e-05	0.00027454	Bacteria	BRC1	ASV709	14-28	0.000219632
83.2243	-2.65251	0.674834	-3.93061	8.47305e-05	0.00040247	Bacteria	Patescibacteria	ASV364	14-28	0.000378795
37557.5	-1.70333	0.383183	-4.44521	8.78077e-06	4.17087e-05	Bacteria	Bacteroidetes	ASV1	28-42	6.06672e-05
1.77366	12.9017	4.6411	2.77987	0.00543806	0.0129154	Bacteria	Fibrobacteres	ASV1694	28-42	0.0172205
26.6011	17.5803	4.60262	3.81962	0.000133655	0.000362779	Bacteria	Epsilonbacteraeota	ASV368	28-42	0.000534622
79.5023	6.86963	0.849543	8.08627	6.15209e-16	5.84448e-15	Bacteria	Planctomycetes	ASV236	28-42	1.1689e-14
61105	-2.17001	0.267865	-8.10113	5.44502e-16	5.84448e-15	Bacteria	Proteobacteria	ASV2	28-42	1.1689e-14
16.4158	5.51174	1.42634	3.86425	0.000111431	0.000352863	Bacteria	Dependentiae	ASV418	28-42	0.000470485
1503.25	-2.84822	0.432342	-6.58788	4.46144e-11	2.82558e-10	Bacteria	Firmicutes	ASV98	28-42	4.84385e-10
22.2366	4.51973	1.0347	4.36815	1.25301e-05	4.76144e-05	Bacteria	Armatimonadetes	ASV402	28-42	7.32529e-05
37557.5	1.02039	0.383202	2.66279	0.00774952	0.0368102	Bacteria	Bacteroidetes	ASV1	42-91	0.0226525
177.013	1.97786	0.647358	3.05529	0.00224846	0.0213604	Bacteria	FBP	ASV199	42-91	0.00776741
11.0337	7.14305	1.67648	4.26075	2.03746e-05	0.000387117	Bacteria	BRC1	ASV709	42-91	0.000110605
83.2243	-1.84305	0.671702	-2.74385	0.00607226	0.0368102	Bacteria	Patescibacteria	ASV364	42-91	0.0184597

## Sheet: CLASS
Supplementary Table 3. Abundance changes expressed as log2fold at the class level. Only the bacterial classes which exhibit significant differences over time are considered (p-values < 0.05).
baseMean	log2FoldChange	lfcSE	stat	pvalue	padj	Kingdom	Phylum	Class	ASV	compar	padjBIEN
1080.77	1.54226	0.569508	2.70806	0.00676784	0.0219955	Bacteria	Verrucomicrobia	Verrucomicrobiae	ASV108	0-14	0.0300793
38463.2	1.11624	0.446264	2.5013	0.012374	0.0344703	Bacteria	Bacteroidetes	Bacteroidia	ASV1	0-14	0.0494958
163.141	-5.67076	1.14288	-4.96183	6.98326e-07	3.89068e-06	Bacteria	FBP	unclassified	ASV199	0-14	7.98087e-06
2.67195	-21.67	4.92339	-4.40144	1.07537e-05	4.65994e-05	Bacteria	Bacteroidetes	Ignavibacteria	ASV1287	0-14	9.55885e-05
18.7669	-22.1573	4.92344	-4.50036	6.78386e-06	3.30713e-05	Bacteria	Epsilonbacteraeota	Campylobacteria	ASV368	0-14	6.78386e-05
72.2403	-7.05484	1.20024	-5.87785	4.15637e-09	2.70164e-08	Bacteria	Planctomycetes	Planctomycetacia	ASV236	0-14	5.54183e-08
70.1866	5.01112	0.759546	6.59752	4.18093e-11	3.26113e-10	Bacteria	Acidobacteria	Acidobacteriia	ASV450	0-14	6.08136e-10
980.225	2.83661	0.720305	3.93807	8.21407e-05	0.000320349	Bacteria	Proteobacteria	Deltaproteobacteria	ASV55	0-14	0.000525701
3148.22	-3.33129	0.382284	-8.71417	2.92892e-18	1.14228e-16	Bacteria	Actinobacteria	Actinobacteria	ASV62	0-14	2.34314e-16
172.498	-9.73049	1.21999	-7.97588	1.51301e-15	2.95036e-14	Bacteria	Actinobacteria	Thermoleophilia	ASV250	0-14	8.06936e-14
93.1989	-8.94089	1.17988	-7.57778	3.51523e-14	3.42735e-13	Bacteria	Actinobacteria	Acidimicrobiia	ASV249	0-14	1.12487e-12
1103.18	0.966399	0.375448	2.57399	0.0100535	0.0301604	Bacteria	Firmicutes	Bacilli	ASV98	0-14	0.0415272
343.179	3.3356	1.02209	3.26349	0.00110048	0.00390171	Bacteria	Firmicutes	Clostridia	ASV239	0-14	0.00517874
88.4136	10.072	1.29187	7.79641	6.36919e-15	8.27995e-14	Bacteria	Patescibacteria	Gracilibacteria	ASV364	0-14	2.54768e-13
163.141	9.58175	1.09737	8.73152	2.51269e-18	9.29697e-17	Bacteria	FBP	unclassified	ASV199	14-28	2.34314e-16
9.15928	6.76065	2.52222	2.68043	0.00735274	0.0302279	Bacteria	Firmicutes	Erysipelotrichia	ASV893	14-28	0.0317956
41.2833	3.9816	0.954837	4.16993	3.04697e-05	0.000281845	Bacteria	unclassified	unclassified	ASV501	14-28	0.000221598
46.2144	5.21868	1.22258	4.2686	1.96705e-05	0.000242603	Bacteria	Firmicutes	Negativicutes	ASV460	14-28	0.000157364
3.24739	-18.2291	4.0065	-4.54987	5.3679e-06	9.93062e-05	Bacteria	Chloroflexi	KD4-96	ASV1270	14-28	5.72576e-05
967.525	-6.66844	1.77541	-3.756	0.000172649	0.000912572	Bacteria	Cyanobacteria	Oxyphotobacteria	ASV15	14-28	0.000977738
1103.18	-1.22779	0.349287	-3.51513	0.000439534	0.00203284	Bacteria	Firmicutes	Bacilli	ASV98	14-28	0.00219767
10.3848	6.54186	1.71783	3.80821	0.000139974	0.000863173	Bacteria	BRC1	unclassified	ASV709	14-28	0.000829476
88.4136	-2.95755	0.748913	-3.94912	7.84385e-05	0.000580445	Bacteria	Patescibacteria	Gracilibacteria	ASV364	14-28	0.000522923
38463.2	-1.78786	0.415023	-4.30787	1.64837e-05	8.24184e-05	Bacteria	Bacteroidetes	Bacteroidia	ASV1	28-42	0.00013881
35.1475	4.73945	1.06072	4.46815	7.8898e-06	4.50846e-05	Bacteria	Acidobacteria	Blastocatellia_(Subgroup_4)	ASV290	28-42	7.42569e-05
2.67195	12.7072	4.64357	2.73651	0.00620947	0.0177414	Bacteria	Bacteroidetes	Ignavibacteria	ASV1287	28-42	0.0283862
18.7669	18.07	4.60204	3.92653	8.61816e-05	0.000344727	Bacteria	Epsilonbacteraeota	Campylobacteria	ASV368	28-42	0.000530349
72.2403	7.83753	1.09971	7.1269	1.02653e-12	1.3687e-11	Bacteria	Planctomycetes	Planctomycetacia	ASV236	28-42	2.05305e-11
38903.8	-2.68812	0.367504	-7.31453	2.58278e-13	5.16555e-12	Bacteria	Proteobacteria	Gammaproteobacteria	ASV2	28-42	5.90349e-12
22223.7	-1.76857	0.252813	-6.9956	2.6413e-12	2.6413e-11	Bacteria	Proteobacteria	Alphaproteobacteria	ASV8	28-42	4.69564e-11
15.0519	5.48785	1.46364	3.74946	0.000177215	0.000644418	Bacteria	Dependentiae	Babeliae	ASV418	28-42	0.000977738
3.24739	16.7145	4.0058	4.17256	3.01191e-05	0.000133863	Bacteria	Chloroflexi	KD4-96	ASV1270	28-42	0.000221598
172.498	4.85721	0.959622	5.06159	4.15779e-07	2.77186e-06	Bacteria	Actinobacteria	Thermoleophilia	ASV250	28-42	5.11728e-06
93.1989	7.41608	1.07257	6.91432	4.70108e-12	3.76086e-11	Bacteria	Actinobacteria	Acidimicrobiia	ASV249	28-42	7.52172e-11
1103.18	-2.57122	0.350875	-7.32802	2.33584e-13	5.16555e-12	Bacteria	Firmicutes	Bacilli	ASV98	28-42	5.90349e-12
16.5542	4.41778	1.23971	3.56356	0.000365865	0.00112574	Bacteria	Armatimonadetes	Fimbriimonadia	ASV402	28-42	0.00188833
343.179	-3.45663	0.940046	-3.67709	0.000235914	0.000786379	Bacteria	Firmicutes	Clostridia	ASV239	28-42	0.00125821
163.141	1.5684	0.609885	2.57162	0.0101223	0.131146	Bacteria	FBP	unclassified	ASV199	42-91	0.0415272
10.3848	6.79531	1.71794	3.9555	7.63763e-05	0.00305505	Bacteria	BRC1	unclassified	ASV709	42-91	0.000522923
88.4136	-2.55733	0.749924	-3.41012	0.000649339	0.0129868	Bacteria	Patescibacteria	Gracilibacteria	ASV364	42-91	0.00314831
